# Supplementary material for: Paired electrolysis enables weak Brønsted base-promoted amination of arenes with N , N -dialkyl formamides as the amine source
Source: Royal Society of Chemistry journal article supplement (doi:10.1039/d4qo01303d), 2024-01-01
Supplement: d4qo01303d1.pdf [file d4qo01303d1.pdf]

## Supporting Information

### Paired electrolysis enables weak Brønsted base-promoted amination of arenes with *N,N*-dialkyl formamides as the amine source

Xiao-Xia Ye,<sup>+[a]</sup> Min Liu,<sup>+[a]</sup> Shi-Yan Wang,<sup>[a]</sup> Jin-Ming Zheng,<sup>[a]</sup> Yi-Fei Li,<sup>[a]</sup> Meng-Xiao Yan,<sup>[c]</sup>  
Xiao-Dong Hu,<sup>[b]</sup> Yan-Shu Luo,<sup>\*[c]</sup> You-Yun Zeng,<sup>[b]</sup> Yun-Rui Cai,<sup>\*[a]</sup> Ren-Hao Li<sup>\*[a]</sup>

<sup>[a]</sup>State Key Laboratory of Macromolecular Drugs and Large-scale Manufacturing, School of  
Pharmaceutical Sciences, Wenzhou Medical University, Wenzhou, Zhejiang 325035, China.

E-mail: cai\_yr@wmu.edu.cn; lirh@wmu.edu.cn.

<sup>[b]</sup>School and Hospital of Stomatology, Wenzhou Medical University, Wenzhou, Zhejiang 325035,  
China.

<sup>[c]</sup>College of Chemistry & Materials Engineering, Wenzhou University, Wenzhou, Zhejiang 325035,  
China.

E-mail: ysluo@wzu.edu.cn.

## Table of Contents

|                                                                                                            |    |
|------------------------------------------------------------------------------------------------------------|----|
| <b>1. General Information</b> .....                                                                        | 3  |
| <b>2. Experimental Section</b> .....                                                                       | 4  |
| <b>2.1 Optimization of conditions for 2a</b> .....                                                         | 4  |
| <b>2.2 Optimization of conditions for 4a</b> .....                                                         | 6  |
| <b>2.3 General procedure for the synthesis of 2</b> .....                                                  | 8  |
| <b>2.4 General procedure for the synthesis of 4</b> .....                                                  | 8  |
| <b>2.5 Procedure for the synthesis of phenothiazinone 8</b> .....                                          | 10 |
| <b>2.6. Large-scale electrochemical reaction of 1a.</b> .....                                              | 10 |
| <b>2.7. Electrochemical reaction of 3a using cost-effective and easily accessible instrument.</b><br>..... | 11 |
| <b>3. Control experiments</b> .....                                                                        | 11 |
| <b>3.1 Kinetic isotope effect study</b> .....                                                              | 12 |
| <b>3.2 1a and 3a with DMF on hydrolysis condition</b> .....                                                | 13 |
| <b>3.3 Divided cell experiments</b> .....                                                                  | 14 |
| <b>3.4 Reaction intermediate investigation</b> .....                                                       | 15 |
| <b>3.5 Detect CO by GC-FID.</b> .....                                                                      | 17 |
| <b>3.6 Amination of naphthalen-1-ol with anhydrous DMF</b> .....                                           | 17 |
| <b>4. Cyclic voltammetry (CV) experiments.</b> .....                                                       | 18 |
| <b>5. Analytical data for products</b> .....                                                               | 21 |
| <b>6. NMR spectra for products</b> .....                                                                   | 39 |
| <b>7. DFT calculations</b> .....                                                                           | 72 |
| <b>7.1 Computational Details</b> .....                                                                     | 72 |
| <b>7.2 Additional Computational Results</b> .....                                                          | 72 |
| <b>7.3 Calculated Energy Values</b> .....                                                                  | 73 |
| <b>7.4 Cartesian Coordinates for All Species</b> .....                                                     | 74 |
| <b>8. References</b> .....                                                                                 | 84 |

## 1. General Information

Chemicals were received from commercial sources without further purification or prepared by literature methods. Melting points are uncorrected and recorded on Digital Melting Point Apparatus WRS-1B.  $^1\text{H}$  NMR and  $^{13}\text{C}$  NMR spectra were measured on a 400 MHz Bruker spectrometer, using  $\text{CDCl}_3$  as the solvent with tetramethylsilane (TMS) as the internal standard at room temperature. The following abbreviations were used to explain the multiplicities: s = singlet, d = doublet, dd = doublet of doublet, t = triplet, q = quartet, m = multiplet. Chemical shifts were reported in units (ppm) by assigning the residual protonated solvent of  $\text{CDCl}_3$  resonance in the  $^1\text{H}$  spectrum as 7.26 ppm and  $\text{CDCl}_3$  resonance in the  $^{13}\text{C}$  spectrum as 77.0 ppm. All coupling constants ( $J$  values) were reported in Hertz (Hz). Chemical shifts of common trace  $^1\text{H}$  NMR impurities (ppm):  $\text{H}_2\text{O}$ : 1.56,  $\text{CHCl}_3$ : 7.26. High-resolution mass spectrometry (HRMS) was performed with a TOF MS instrument with an ESI source. Column chromatography was performed using EM silica gel 60 (300–400 mesh). Reactions were monitored by thin layer chromatography (TLC). Visualization was achieved under a UV lamp (254 nm and 365 nm). Electrolysis experiments were performed using a MESTEK power supply (DP3005B). Cyclic voltammograms were obtained on a CHI 760E potentiostat.

## 2. Experimental Section

### 2.1 Optimization of conditions for 2a

**Table S1.** Optimization of the reaction conditions for **2a**<sup>a</sup>

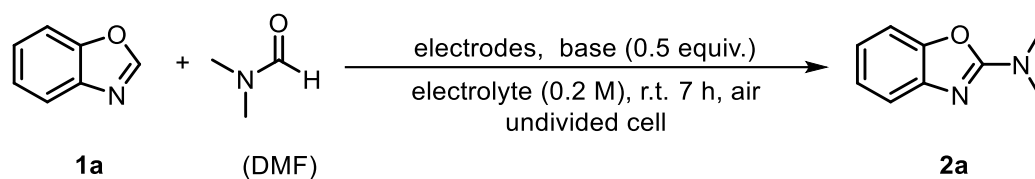

| entry | electrolyte                                    | electrodes   | base                               | Yield(%) <sup>b</sup> |
|-------|------------------------------------------------|--------------|------------------------------------|-----------------------|
| 1     | <sup>n</sup> Bu <sub>4</sub> NBF <sub>4</sub>  | C(+) Pt(-)   | Ca(OAc) <sub>2</sub>               | 86                    |
| 2     | <sup>n</sup> Bu <sub>4</sub> NBF <sub>4</sub>  | C(+) Pt(-)   | -                                  | n.d.                  |
| 3     | <sup>n</sup> Bu <sub>4</sub> NBF <sub>4</sub>  | C(+) Pt(-)   | NaOH                               | 47                    |
| 4     | <sup>n</sup> Bu <sub>4</sub> NBF <sub>4</sub>  | C(+) Pt(-)   | <sup>t</sup> BuOK                  | 32                    |
| 5     | <sup>n</sup> Bu <sub>4</sub> NBF <sub>4</sub>  | C(+) Pt(-)   | NaOEt                              | 36                    |
| 6     | <sup>n</sup> Bu <sub>4</sub> NBF <sub>4</sub>  | C(+) Pt(-)   | CF <sub>3</sub> CO <sub>2</sub> Na | 0                     |
| 7     | <sup>n</sup> Bu <sub>4</sub> NBF <sub>4</sub>  | C(+) Pt(-)   | K <sub>2</sub> CO <sub>3</sub>     | 41                    |
| 8     | <sup>n</sup> Bu <sub>4</sub> NBF <sub>4</sub>  | C(+) Pt(-)   | K <sub>2</sub> HPO <sub>4</sub>    | 0                     |
| 9     | <sup>n</sup> Bu <sub>4</sub> NBF <sub>4</sub>  | C(+) Pt(-)   | LiOAc <sup>c</sup>                 | 68                    |
| 10    | <sup>n</sup> Bu <sub>4</sub> NBF <sub>4</sub>  | C(+) Pt(-)   | NaOAc <sup>c</sup>                 | 53                    |
| 11    | <sup>n</sup> Bu <sub>4</sub> NBF <sub>4</sub>  | C(+) Pt(-)   | KOAc <sup>c</sup>                  | 64                    |
| 12    | <sup>n</sup> Bu <sub>4</sub> NBF <sub>4</sub>  | C(+) Pt(-)   | Mg(OAc) <sub>2</sub>               | 49                    |
| 13    | <sup>n</sup> Bu <sub>4</sub> NBF <sub>4</sub>  | C(+) Pt(-)   | Ca(OAc) <sup>d</sup>               | 32                    |
| 14    | <sup>n</sup> Bu <sub>4</sub> NBF <sub>4</sub>  | C(+) Pt(-)   | Ca(OAc) <sup>c</sup>               | 78                    |
| 15    | <sup>n</sup> Bu <sub>4</sub> NCIO <sub>4</sub> | C(+) Pt(-)   | Ca(OAc)                            | n.d.                  |
| 16    | <sup>n</sup> Bu <sub>4</sub> NPF <sub>4</sub>  | C(+) Pt(-)   | Ca(OAc)                            | n.d.                  |
| 17    | <sup>n</sup> Bu <sub>4</sub> NI                | C(+) Pt(-)   | Ca(OAc)                            | n.d.                  |
| 18    | <sup>n</sup> Bu <sub>4</sub> NHSO <sub>4</sub> | C(+) Pt(-)   | Ca(OAc)                            | n.d.                  |
| 19    | <sup>n</sup> Bu <sub>4</sub> NBF <sub>4</sub>  | Pt(+) Pt(-)  | Ca(OAc)                            | 73                    |
| 20    | <sup>n</sup> Bu <sub>4</sub> NBF <sub>4</sub>  | C(+) C(-)    | Ca(OAc)                            | n.d.                  |
| 21    | <sup>n</sup> Bu <sub>4</sub> NBF <sub>4</sub>  | Pt(+) C(-)   | Ca(OAc)                            | n.d.                  |
| 22    | <sup>n</sup> Bu <sub>4</sub> NBF <sub>4</sub>  | Cu(+) Pt(-)  | Ca(OAc)                            | n.d.                  |
| 23    | <sup>n</sup> Bu <sub>4</sub> NBF <sub>4</sub>  | RVC(+) Pt(-) | Ca(OAc)                            | n.d.                  |
| 24    | <sup>n</sup> Bu <sub>4</sub> NBF <sub>4</sub>  | Ni(+) Pt(-)  | Ca(OAc)                            | n.d.                  |
| 25    | <sup>n</sup> Bu <sub>4</sub> NBF <sub>4</sub>  | C(+) Pt(-)   | Ca(OAc)                            | 80 <sup>e</sup>       |
| 26    | <sup>n</sup> Bu <sub>4</sub> NBF <sub>4</sub>  | C(+) Pt(-)   | Ca(OAc)                            | n.d. <sup>f</sup>     |
| 27    | <sup>n</sup> Bu <sub>4</sub> NBF <sub>4</sub>  | C(+) Pt(-)   | Ca(OAc)                            | n.d. <sup>g</sup>     |

<sup>a</sup>Reaction conditions: **3a** (0.3 mmol), electrodes, 10 mA, base (1.0 equiv.), electrolyte (0.2 M), and DMF (5 mL), in an undivided cell, rt, 2 h, in air, n.d. = no detected. <sup>b</sup>Yield of the isolated product **4a**. <sup>c</sup>1.0 equiv. <sup>d</sup>0.25 equiv. <sup>e</sup>15 mA. <sup>f</sup>5 mA. <sup>g</sup>no electricity.

Table S2. Optimization of DMF in different solvents for **2a**<sup>a</sup>.

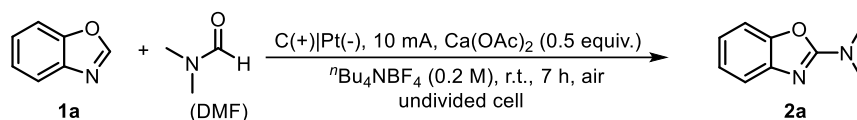

| entr | solvents               | yield <sup>b</sup> |
|------|------------------------|--------------------|
| 1    | $\text{CH}_3\text{CN}$ | trace              |
| 2    | MeOH                   | n.d.               |
| 3    | DMSO                   | trace              |
| 4    | DMA                    | trace              |

<sup>a</sup>Standard conditions: **1a** (0.30 mmol), DMF (3 mmol),  $\text{C}(+)/\text{Pt}(-)$ , 10 mA,  $\text{Ca}(\text{OAc})_2$  (0.5 equiv.),

<sup>t</sup> $\text{Bu}_4\text{NBF}_4$  (0.2 M), solvent (5 mL), in an undivided cell, r.t., 7 h, in air. <sup>b</sup>n.d. = no detected.

## 2.2 Optimization of conditions for 4a

Table S3. Optimization of the reaction conditions for 4a<sup>a</sup>

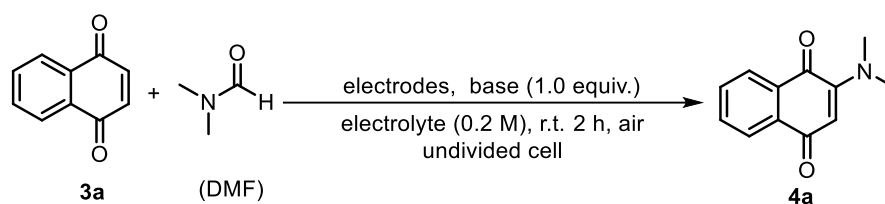

| entry | electrolyte                                    | electrodes   | base                               | Yield(%) <sup>b</sup> |
|-------|------------------------------------------------|--------------|------------------------------------|-----------------------|
| 1     | <sup>n</sup> Bu <sub>4</sub> NBF <sub>4</sub>  | Pt(+) Pt(-)  | NaOAc                              | 90                    |
| 2     | <sup>n</sup> Bu <sub>4</sub> NBF <sub>4</sub>  | Pt(+) Pt(-)  | -                                  | n.d.                  |
| 3     | <sup>n</sup> Bu <sub>4</sub> NBF <sub>4</sub>  | Pt(+) Pt(-)  | NaOH                               | 0                     |
| 4     | <sup>n</sup> Bu <sub>4</sub> NBF <sub>4</sub>  | Pt(+) Pt(-)  | <sup>t</sup> BuOK                  | 0                     |
| 5     | <sup>n</sup> Bu <sub>4</sub> NBF <sub>4</sub>  | Pt(+) Pt(-)  | NaOEt                              | 0                     |
| 6     | <sup>n</sup> Bu <sub>4</sub> NBF <sub>4</sub>  | Pt(+) Pt(-)  | CF <sub>3</sub> CO <sub>2</sub> Na | 61                    |
| 7     | <sup>n</sup> Bu <sub>4</sub> NBF <sub>4</sub>  | Pt(+) Pt(-)  | K <sub>2</sub> CO <sub>3</sub>     | 32                    |
| 8     | <sup>n</sup> Bu <sub>4</sub> NBF <sub>4</sub>  | Pt(+) Pt(-)  | K <sub>2</sub> HPO <sub>4</sub>    | 0                     |
| 9     | <sup>n</sup> Bu <sub>4</sub> NBF <sub>4</sub>  | Pt(+) Pt(-)  | LiOAc                              | 16                    |
| 10    | <sup>n</sup> Bu <sub>4</sub> NBF <sub>4</sub>  | Pt(+) Pt(-)  | KOAc                               | 63                    |
| 11    | <sup>n</sup> Bu <sub>4</sub> NBF <sub>4</sub>  | Pt(+) Pt(-)  | Ca(OAc) <sub>2</sub> <sup>c</sup>  | 38                    |
| 12    | <sup>n</sup> Bu <sub>4</sub> NBF <sub>4</sub>  | Pt(+) Pt(-)  | Mg(OAc) <sub>2</sub> <sup>c</sup>  | 44                    |
| 13    | <sup>n</sup> Bu <sub>4</sub> NBF <sub>4</sub>  | Pt(+) Pt(-)  | NaOAc <sup>c</sup>                 | 45                    |
| 14    | <sup>n</sup> Bu <sub>4</sub> NBF <sub>4</sub>  | Pt(+) Pt(-)  | NaOAc <sup>d</sup>                 | 74                    |
| 15    | <sup>n</sup> Bu <sub>4</sub> NCIO <sub>4</sub> | Pt(+) Pt(-)  | NaOAc                              | n.d.                  |
| 16    | <sup>n</sup> Bu <sub>4</sub> NPF <sub>4</sub>  | Pt(+) Pt(-)  | NaOAc                              | n.d.                  |
| 17    | <sup>n</sup> Bu <sub>4</sub> NI                | Pt(+) Pt(-)  | NaOAc                              | n.d.                  |
| 18    | <sup>n</sup> Bu <sub>4</sub> NHSO <sub>4</sub> | Pt(+) Pt(-)  | NaOAc                              | n.d.                  |
| 19    | <sup>n</sup> Bu <sub>4</sub> NBF <sub>4</sub>  | C(+) Pt(-)   | NaOAc                              | trace                 |
| 20    | <sup>n</sup> Bu <sub>4</sub> NBF <sub>4</sub>  | Ti(+) Pt(-)  | NaOAc                              | n.d.                  |
| 21    | <sup>n</sup> Bu <sub>4</sub> NBF <sub>4</sub>  | Ag(+) Pt(-)  | NaOAc                              | n.d.                  |
| 22    | <sup>n</sup> Bu <sub>4</sub> NBF <sub>4</sub>  | Cu(+) Pt(-)  | NaOAc                              | trace                 |
| 23    | <sup>n</sup> Bu <sub>4</sub> NBF <sub>4</sub>  | RVC(+) Pt(-) | NaOAc                              | trace                 |
| 24    | <sup>n</sup> Bu <sub>4</sub> NBF <sub>4</sub>  | Al(+) Al(-)  | NaOAc                              | 72                    |
| 25    | <sup>n</sup> Bu <sub>4</sub> NBF <sub>4</sub>  | Pt(+) Pt(-)  | NaOAc                              | 68 <sup>e</sup>       |
| 26    | <sup>n</sup> Bu <sub>4</sub> NBF <sub>4</sub>  | Pt(+) Pt(-)  | NaOAc                              | 61 <sup>f</sup>       |
| 27    | <sup>n</sup> Bu <sub>4</sub> NBF <sub>4</sub>  | Pt(+) Pt(-)  | NaOAc                              | n.d. <sup>g</sup>     |

<sup>a</sup>Reaction conditions: 3a (0.3 mmol), electrodes, 10 mA, base (1.0 equiv.), electrolyte (0.2 M), and DMF (5 mL), in an undivided cell, rt, 2 h, in air, n.d. = no detected. <sup>b</sup>Yield of the isolated product 4a. <sup>c</sup>0.5 equiv. <sup>d</sup>2.0 equiv. <sup>e</sup>15 mA. <sup>f</sup>5 mA. <sup>g</sup>no electricity.

Table S4. Optimization of DMF in different solvents for **4a**<sup>a</sup>.

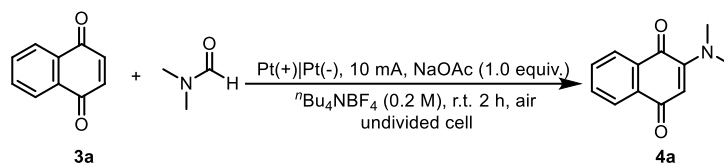

| entr | solvents           | yield <sup>b</sup> |
|------|--------------------|--------------------|
| 1    | CH <sub>3</sub> CN | n.d.               |
| 2    | MeOH               | n.d.               |
| 3    | DMSO               | trace              |
| 4    | DMA                | trace              |

<sup>a</sup>Standard conditions: **3a** (0.30 mmol), DMF (3 mmol), Pt(+)/Pt(-), 10 mA, NaOAc (1.0 equiv.), <sup>t</sup>Bu<sub>4</sub>NBF<sub>4</sub> (0.2 M), and solvent (5 mL), in an undivided cell, r.t., 2 h, in air. <sup>b</sup>n.d. = no detected.

### 2.3 General procedure for the synthesis of 2

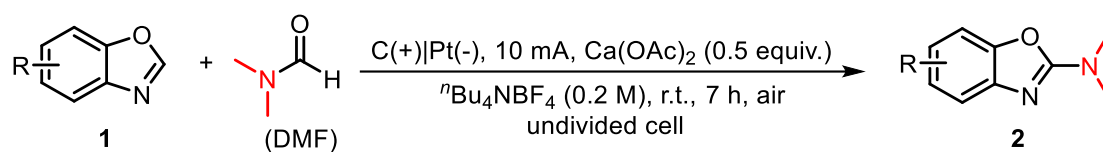

An oven-dried 25 mL three-necked round-bottomed flask with a magnetic stir bar was charged with substrate **1** (0.3 mmol), <sup>n</sup>Bu<sub>4</sub>NBF<sub>4</sub> (1.0 mmol, 0.2 M), Ca(OAc)<sub>2</sub> (0.15 mmol, 0.5 equiv.). The flask was equipped with graphite rod as the anode and platinum plate as the cathode (10 mm x 10 mm x 0.1 mm). The electrolysis was carried out at r.t. in DMF (5.0 mL) using a constant current of 10 mA for 7 hours. The reaction mixture was extracted with EtOAc (15 mL × 3). The collected organic layers were dried, evaporated and chromatographed through silica gel eluting with ethyl acetate/hexanes to give the desired products **2**.

### 2.4 General procedure for the synthesis of 4

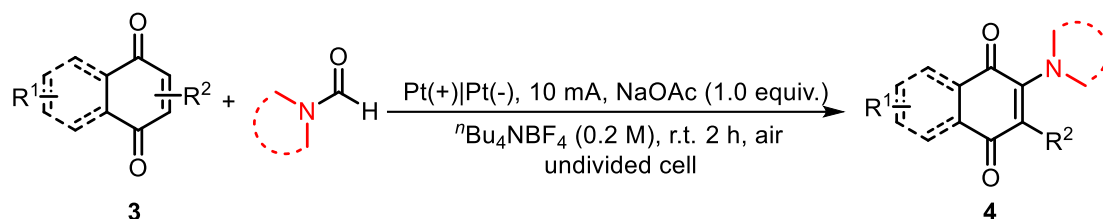

An oven-dried 25 mL three-necked round-bottomed flask with a magnetic stir bar was charged with substrate **3** (0.3 mmol), <sup>n</sup>Bu<sub>4</sub>NBF<sub>4</sub> (1.0 mmol, 0.2 M), NaOAc (0.3 mmol, 1.0 equiv.). The flask was equipped with platinum plate as the anode (10 mm x 10 mm x 0.1 mm) and platinum plate as the cathode (10 mm x 10 mm x 0.1 mm). The electrolysis was carried out at r.t. in DMF (5.0 mL) using a constant current of 10 mA for 2 hours. The reaction mixture was extracted with EtOAc (15 mL × 3). The collected organic layers were dried, evaporated and chromatographed through silica gel eluting with ethyl acetate/hexanes to give the desired products **4**.



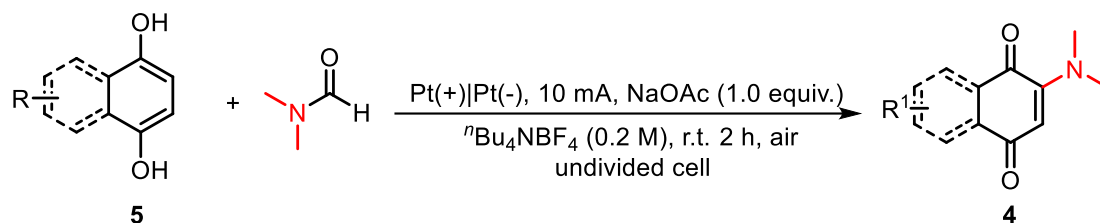

An oven-dried 25 mL three-necked round-bottomed flask with a magnetic stir bar was charged with substrate **5** (0.3 mmol),  $^n\text{Bu}_4\text{NBF}_4$  (1.0 mmol, 0.2 M), NaOAc (0.3 mmol, 1.0 equiv.). The flask was equipped with platinum plate as the anode (10 mm x 10 mm x 0.1 mm) and platinum plate as the cathode (10 mm x 10 mm x 0.1 mm). The electrolysis was carried out at r.t. in DMF (5.0 mL) using a constant current of 10 mA for 2 hours. The reaction mixture was extracted with EtOAc (15 mL  $\times$  3). The collected organic layers were dried, evaporated and chromatographed through silica gel eluting with ethyl acetate/hexanes to give the desired products **4**.

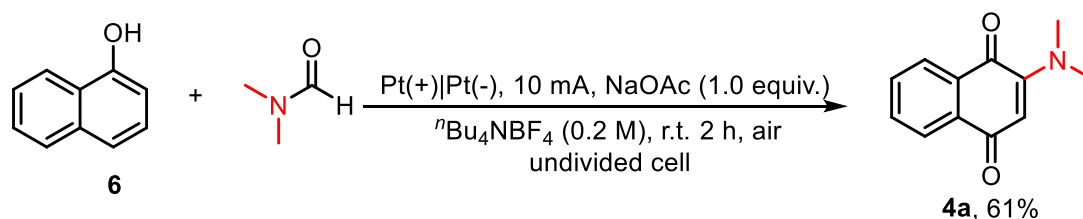

An oven-dried 25 mL three-necked round-bottomed flask with a magnetic stir bar was charged with substrate **6** (0.3 mmol),  $^n\text{Bu}_4\text{NBF}_4$  (1.0 mmol, 0.2 M), NaOAc (0.3 mmol, 1.0 equiv.). The flask was equipped with platinum plate as the anode (10 mm x 10 mm x 0.1 mm) and platinum plate as the cathode (10 mm x 10 mm x 0.1 mm). The electrolysis was carried out at r.t. in DMF (5.0 mL) using a constant current of 10 mA for 2 hours. The reaction mixture was extracted with EtOAc (15 mL  $\times$  3). The collected organic layers were dried, evaporated and chromatographed through silica gel eluting with ethyl acetate/hexanes to give the desired products **4a**.

## 2.5 Procedure for the synthesis of phenothiazinone 8

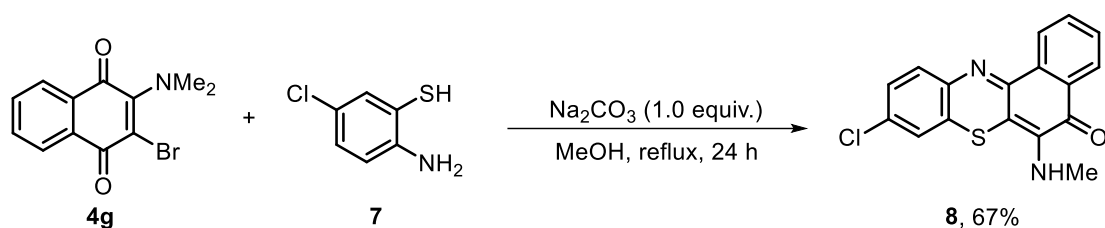

The product **4g** (0.3 mmol), 2-amino-5-chlorobenzenethiol (0.3 mmol) and  $\text{Na}_2\text{CO}_3$  (0.3 mmol, 1.0 equiv.) were dissolved in 5 mL of MeOH. The reaction was carried out at 65 °C for 24 hours. The organic layers were evaporated and chromatographed through silica gel eluting with ethyl acetate/hexanes to afford product **8**.

## 2.6. Large-scale electrochemical reaction of 1a.

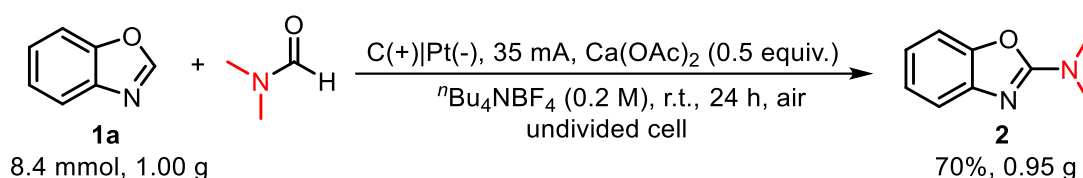

An oven-dried 100 mL flask with a magnetic stir bar was charged with benzo[*d*]oxazole (1.00 g, 8.4 mmol),  $^n\text{Bu}_4\text{NBF}_4$  (10.0 mmol, 0.2 M),  $\text{Ca(OAc)}_2$  (4.2 mmol, 0.5 equiv.). The flask was equipped with graphite rod as the anode and platinum plate as the cathode (10 mm x 10 mm x 0.1 mm). The electrolysis was carried out at r.t. in DMF (50.0 mL) using a constant current of 35 mA for 24 hours. The reaction mixture was extracted with EtOAc (50 mL  $\times$  3). The collected organic layers were dried, evaporated and chromatographed through silica gel eluting with ethyl acetate/hexanes to give the desired products **2** (0.95 g, 70%).

## 2.7. Electrochemical reaction of 3a using cost-effective and easily accessible instrument.

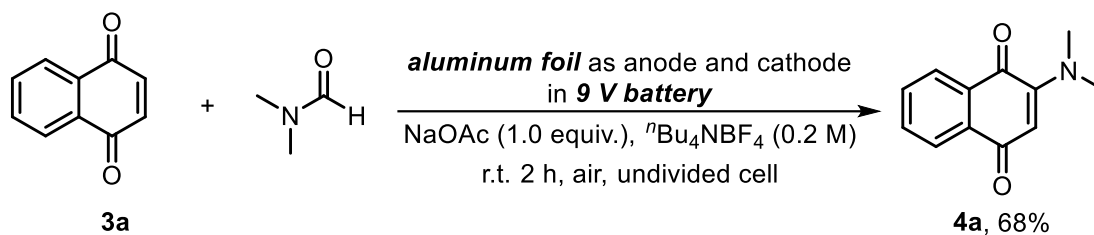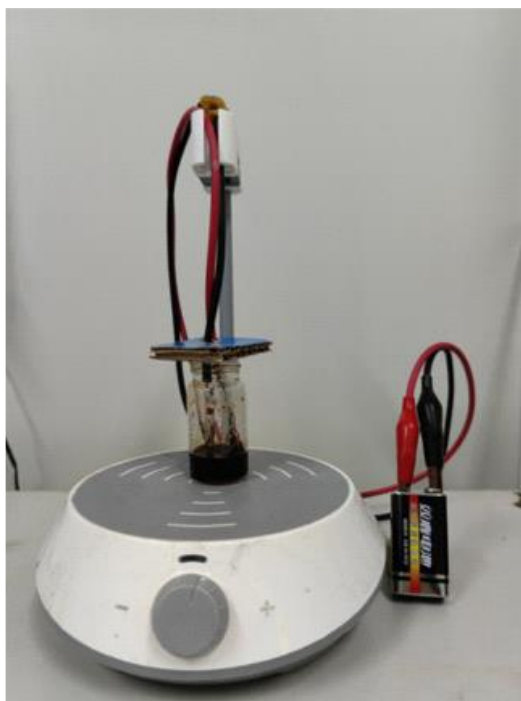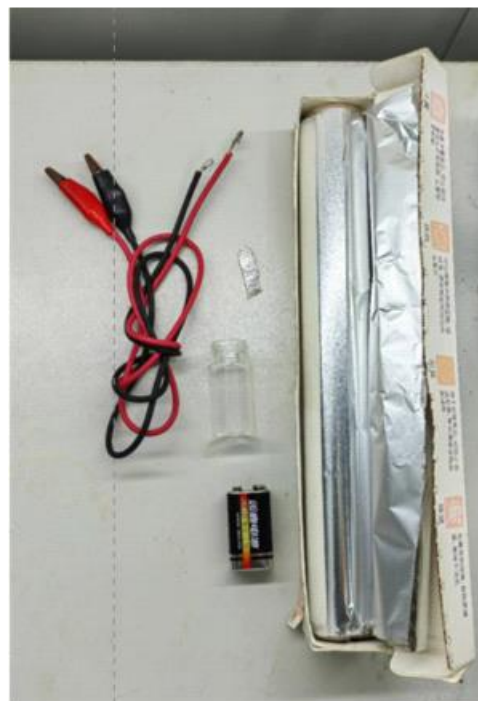

A 25 mL flask with a magnetic stir bar was charged with substrate **3a** (0.3 mmol),  $t\text{Bu}_4\text{NBF}_4$  (1.0 mmol, 0.2 M), NaOAc (0.3 mmol, 1.0 equiv.). The flask was equipped with aluminum foil as the anode and aluminum foil as the cathode. The electrolysis was carried out at r.t. in DMF (5.0 mL) using 9V battery as power supply for 2 hours. The reaction mixture was extracted with EtOAc (15 mL  $\times$  3). The collected organic layers were dried, evaporated and chromatographed through silica gel eluting with ethyl acetate/hexanes to give the desired products **4a**.

## 3. Control experiments

### 3.1 Kinetic isotope effect study

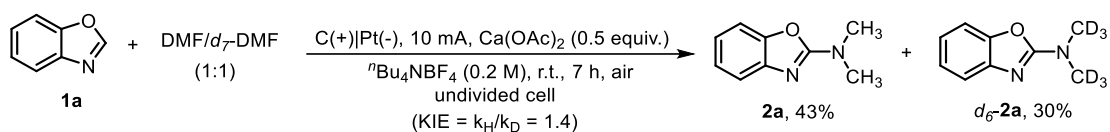

An oven-dried 25 mL three-necked round-bottomed flask with a magnetic stir bar was charged with substrate **1a** (0.3 mmol),  $n\text{Bu}_4\text{NBF}_4$  (1.0 mmol, 0.2 M),  $\text{Ca}(\text{OAc})_2$  (0.15 mmol, 0.5 equiv.). The flask was equipped with graphite rod as the anode and platinum plate as the cathode (10 mm x 10 mm x 0.1 mm). The electrolysis was carried out at r.t. in DMF (2.5 mL) and  $d_6$ -DMF (2.5 mL) using a constant current of 10 mA for 7 hours. The reaction mixture was extracted with EtOAc (15 mL  $\times$  3). The collected organic layers were dried, evaporated and chromatographed through silica gel eluting with ethyl acetate/hexanes to give the desired products **2a** and  $d_6$ -**2a**.

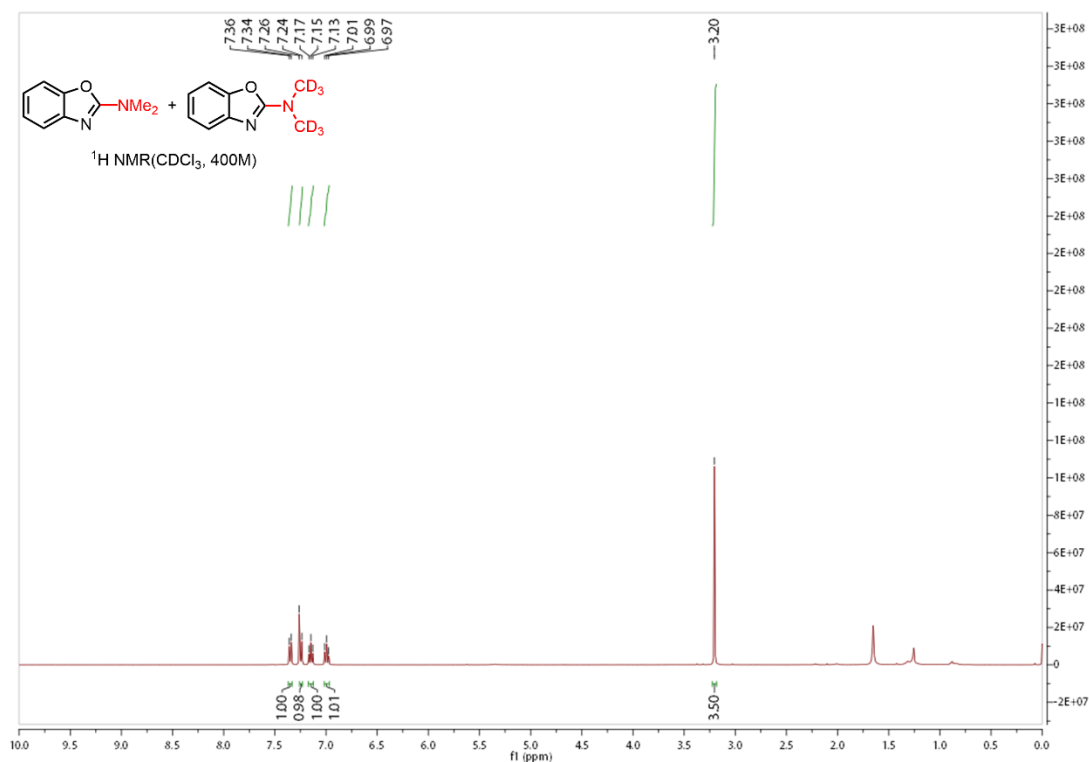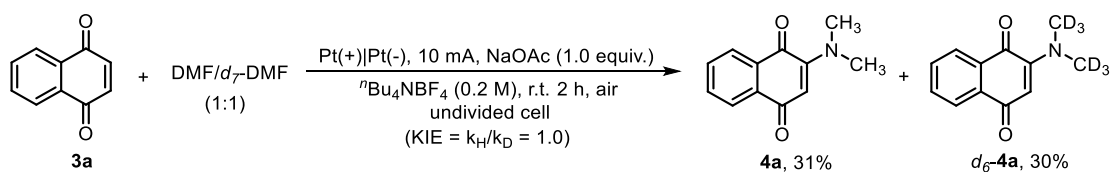

An oven-dried 25 mL three-necked round-bottomed flask with a magnetic stir bar was charged with substrate **3a** (0.3 mmol),  ${}^n\text{Bu}_4\text{NBF}_4$  (1.0 mmol, 0.2 M), NaOAc (0.3 mmol, 1.0 equiv.). The flask was equipped with platinum plate as the anode (10 mm x 10 mm x 0.1 mm) and platinum plate as the cathode (10 mm x 10 mm x 0.1 mm). The electrolysis was carried out at r.t. in DMF (2.5 mL) and  $d_6$ -DMF (2.5 mL) using a constant current of 10 mA for 2 hours. The reaction mixture was extracted with EtOAc (15 mL  $\times$  3). The collected organic layers were dried, evaporated and chromatographed through silica gel eluting with ethyl acetate/hexanes to give the desired products **4a** and  $d_6$ -**4a**.

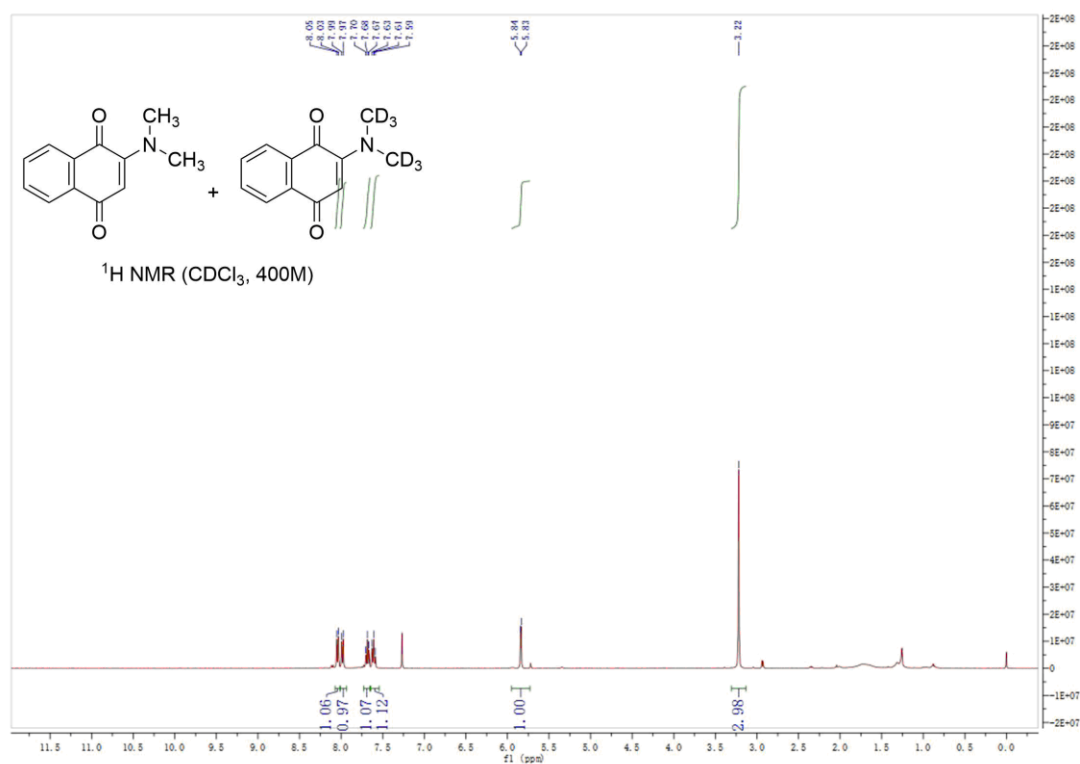

### 3.2 1a and 3a with DMF on hydrolysis condition

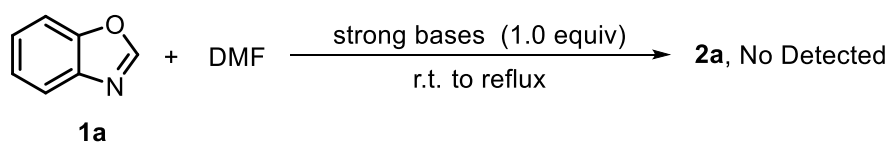

The starting material, benzo[*d*]oxazole (35.7 mg, 0.3 mmol) and strong base (0.3 mmol, 1.0 equiv.), such as KOH, NaOH and <sup>t</sup>BuOK, were dissolved in 5 mL of DMF. The reaction mixture was stirred gently in an oil bath at room temperature or 153 °C for 12 hours. Monitoring reaction progress via thin-layer chromatography (TLC).

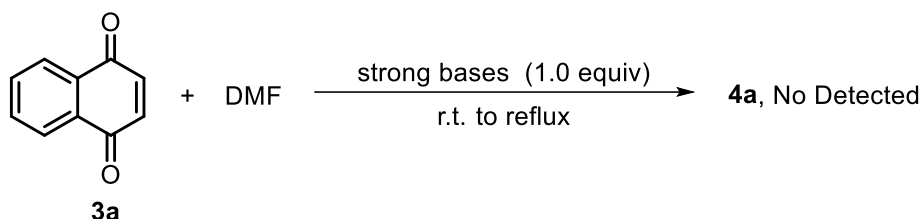

The starting material, naphthalene-1,4-dione (47.5 mg, 0.3 mmol) and strong base (0.3 mmol, 1.0 equiv.), such as KOH, NaOH and <sup>t</sup>BuOK, were dissolved in 5 mL of DMF. The reaction mixture was stirred gently in an oil bath at room temperature or 153 °C for 12 hours. Monitoring reaction progress via thin-layer chromatography (TLC).

### 3.3 Divided cell experiments

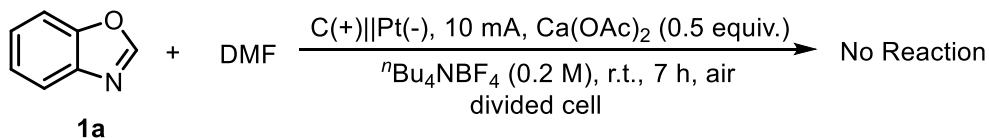

The electrolyses were carried out in a concentric cell with two compartments separated by an anionic membrane and equipped with amagnetic stirrer. The starting material, benzo[*d*]oxazole **1a** (0.3 mmol), <sup>n</sup>Bu<sub>4</sub>NBF<sub>4</sub> (2.0 mmol, 0.2 M), Ca(OAc)<sub>2</sub> (0.15 mmol, 0.5 equiv.) were dissolved in 10 mL of DMF using a constant current of 10 mA for 7 hours. The flask was equipped with graphite rod as the anode and platinum plate as the cathode (10 mm x 10 mm x 0.1 mm). Monitoring reaction progress via thin-layer chromatography (TLC).

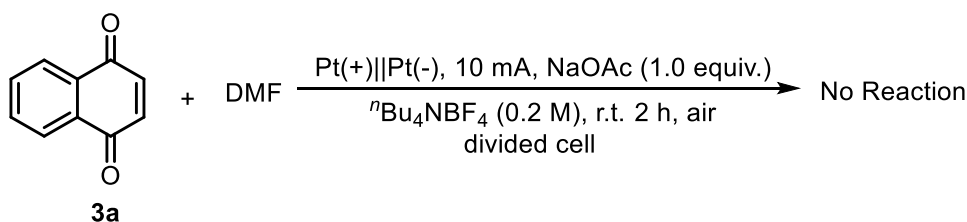

The electrolyses were carried out in a concentric cell with two compartments separated by an anionic membrane and equipped with amagnetic stirrer. The starting material, naphthalene-1,4-dione **3a** (0.3 mmol),  ${}^n\text{Bu}_4\text{NBF}_4$  (2.0 mmol, 0.2 M), NaOAc (0.3 mmol, 1.0 equiv.) were dissolved in 10 mL of DMF using a constant current of 10 mA for 2 hours. The flask was equipped with platinum plate as the anode (10 mm x 10 mm x 0.1 mm) and platinum plate as the cathode (10 mm x 10 mm x 0.1 mm). Monitoring reaction progress via thin-layer chromatography (TLC).

### 3.4 Reaction intermediate investigation

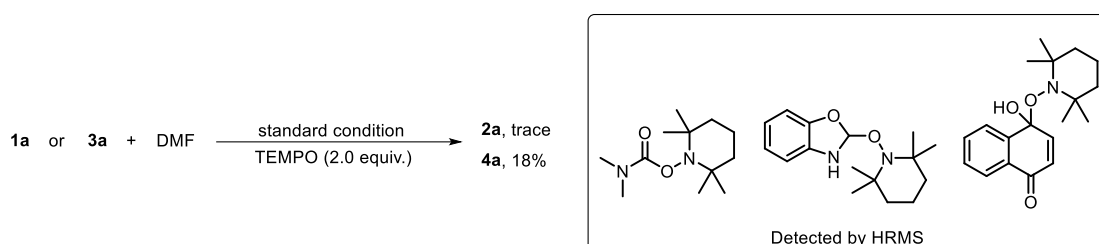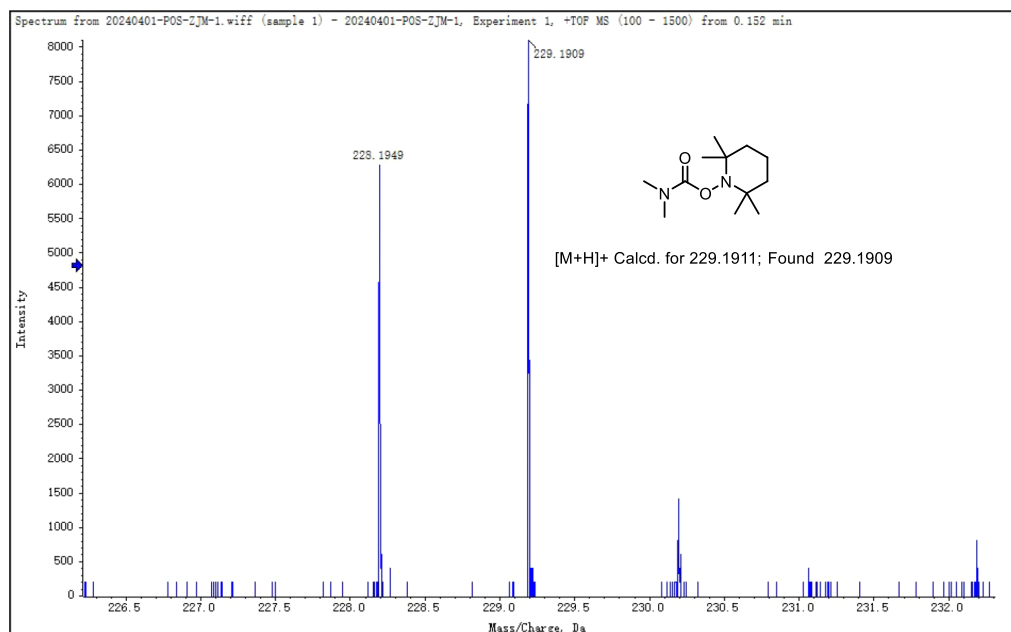

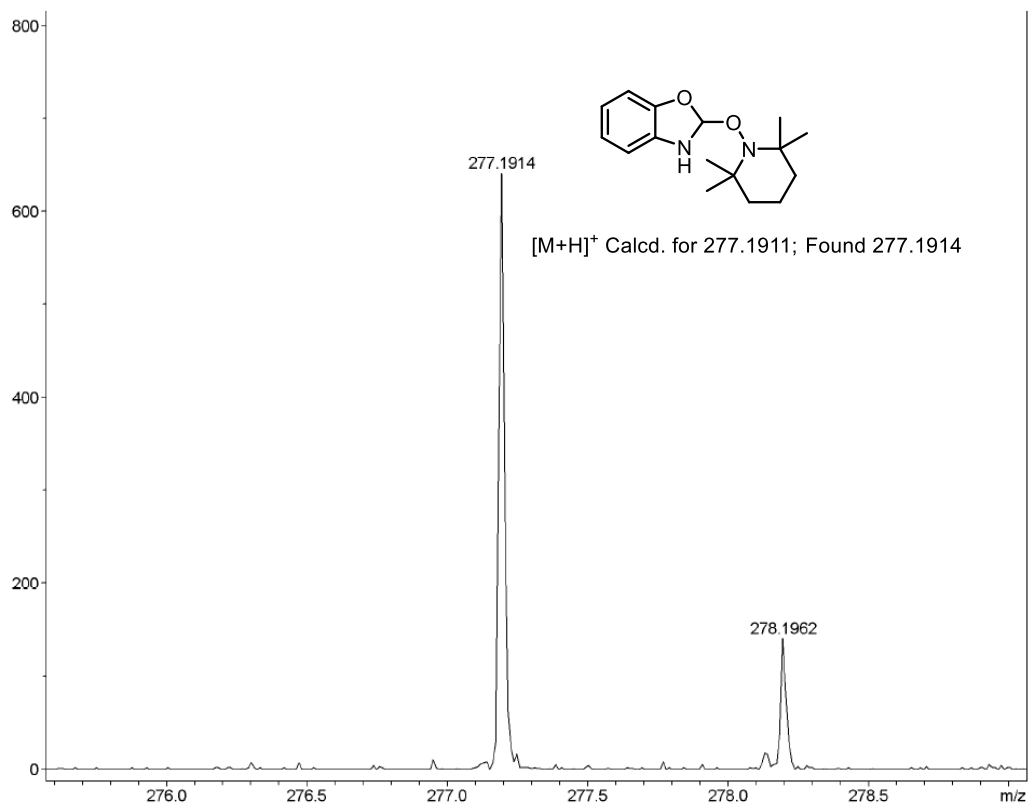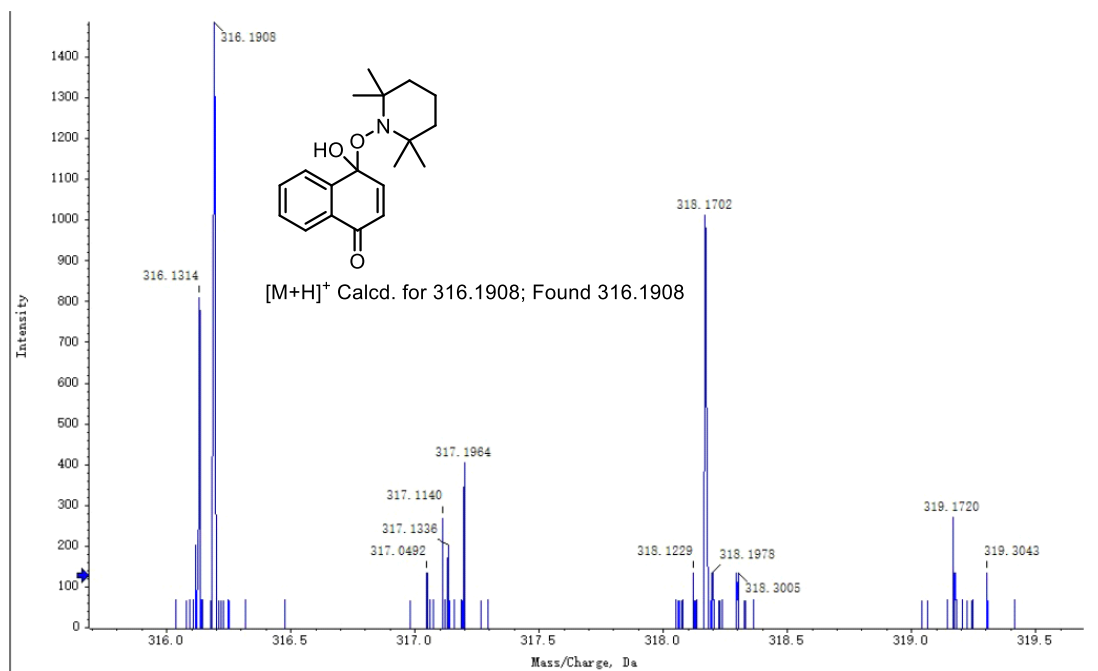



### 3.5 Detect CO by GC-FID.

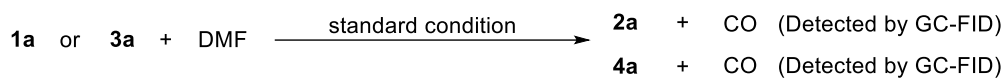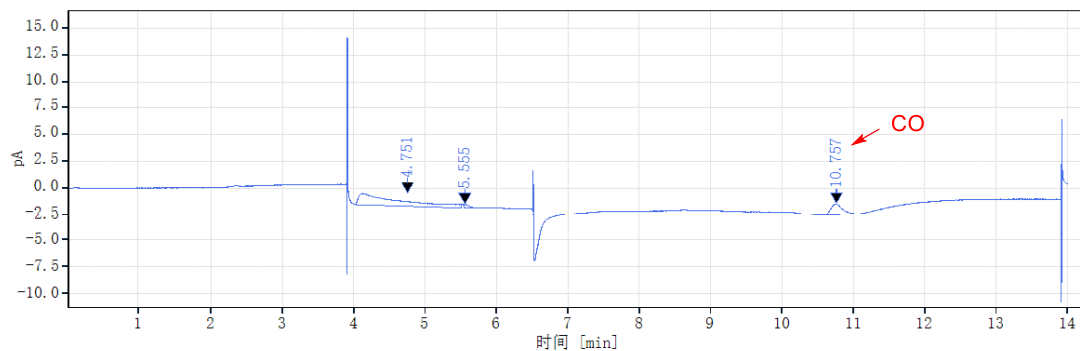

### 3.6 Amination of naphthalen-1-ol with anhydrous DMF

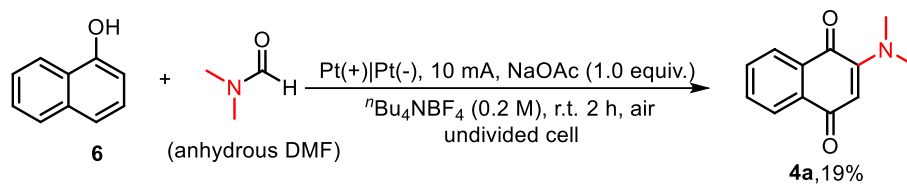

The anhydrous DMF as solvent led to poor reaction performance, delivering product **4a** in 19% yield.

#### 4. Cyclic voltammetry (CV) experiments.

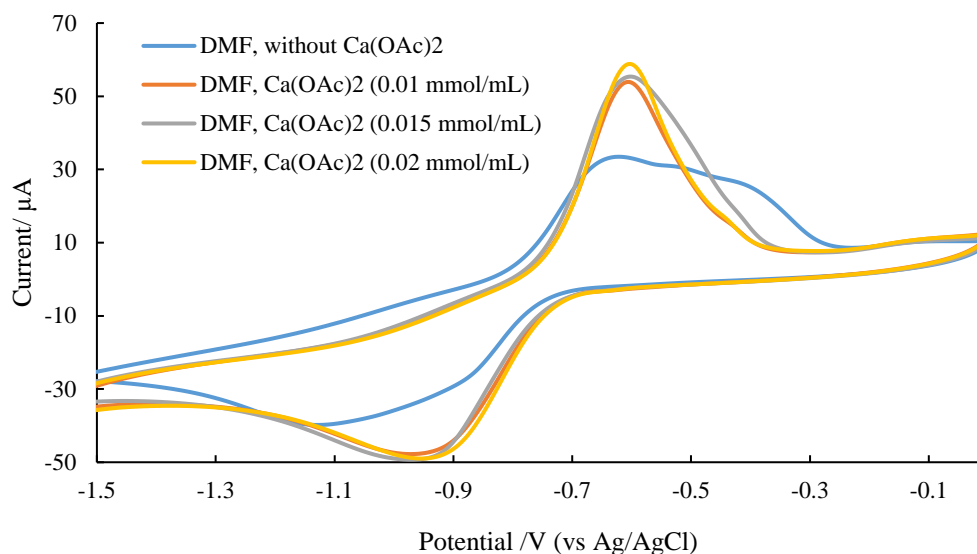

**Figure S1.** CV tests of DMF with different amount of Ca(OAc)<sub>2</sub>.

The cyclic voltammograms were recorded in an electrolyte of <sup>n</sup>Bu<sub>4</sub>NBF<sub>4</sub> (0.2 M) in DMF using a glassy carbon disk working electrode (diameter, 3 mm), a Pt wire auxiliary electrode and a SCE reference electrode. The scan rate is 100 mV/s. (blue line) DMF, <sup>n</sup>Bu<sub>4</sub>NBF<sub>4</sub> (0.2 M); (orange line) DMF, <sup>n</sup>Bu<sub>4</sub>NBF<sub>4</sub> (0.2 M), Ca(OAc)<sub>2</sub> (0.01 M); (gray line) DMF, <sup>n</sup>Bu<sub>4</sub>NBF<sub>4</sub> (0.2 M), Ca(OAc)<sub>2</sub> (0.015 M); (yellow line) DMF, <sup>n</sup>Bu<sub>4</sub>NBF<sub>4</sub> (0.2 M), Ca(OAc)<sub>2</sub> (0.02 M).

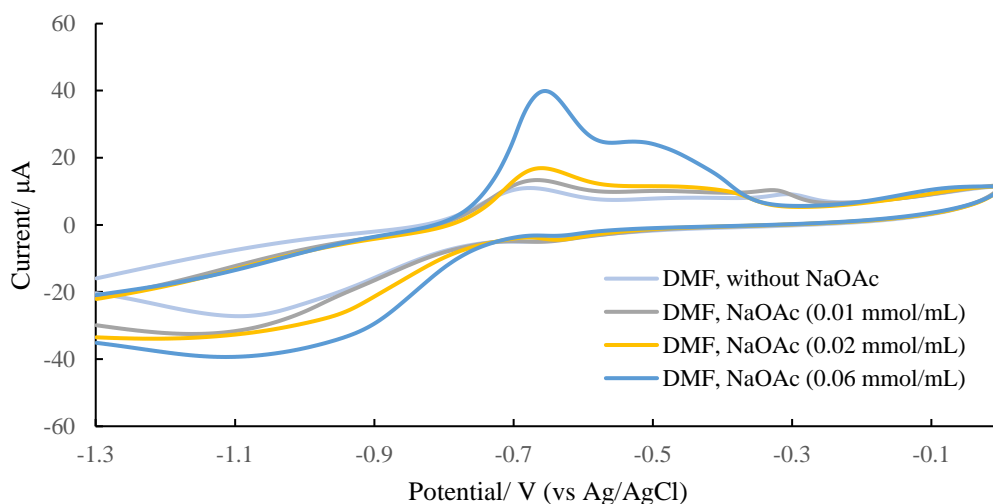

**Figure S2.** CV tests of DMF with different amount of NaOAc.

The cyclic voltammograms were recorded in an electrolyte of <sup>n</sup>Bu<sub>4</sub>NBF<sub>4</sub> (0.2 M) in DMF using a glassy carbon disk working electrode (diameter, 3 mm), a Pt wire auxiliary

electrode and a SCE reference electrode. The scan rate is 100 mV/s. (bluish line) DMF,  $n\text{Bu}_4\text{NBF}_4$  (0.2 M); (gray line) DMF,  $n\text{Bu}_4\text{NBF}_4$  (0.2 M), NaOAc (0.01 M); (yellow line) DMF,  $n\text{Bu}_4\text{NBF}_4$  (0.2 M), NaOAc (0.02 M); (blue line) DMF,  $n\text{Bu}_4\text{NBF}_4$  (0.2 M), NaOAc (0.06 M).

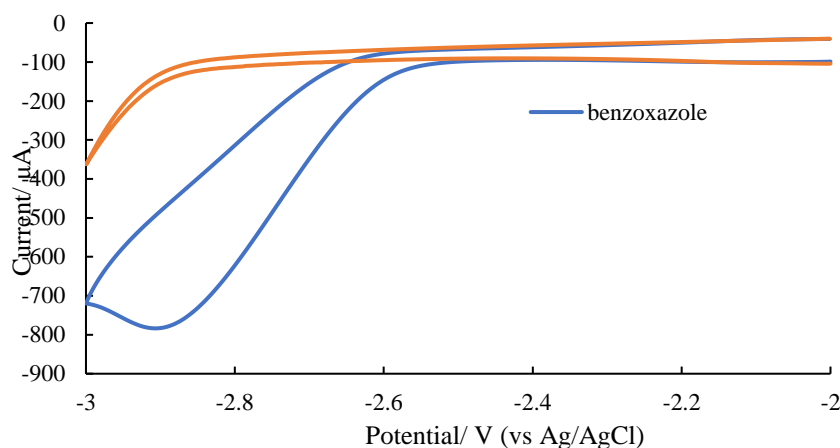

Figure S3. Reduction potential of benzoxazole.

The cyclic voltammograms were recorded in an electrolyte of  $n\text{Bu}_4\text{NBF}_4$  (0.2 M) in acetonitrile using a glassy carbon disk working electrode (diameter, 3 mm), a Pt wire auxiliary electrode and a SCE reference electrode. The scan rate is 100 mV/s. (organe line) acetonitrile,  $n\text{Bu}_4\text{NBF}_4$  (0.2 M); (blue line) acetonitrile,  $n\text{Bu}_4\text{NBF}_4$  (0.2 M), benzoxazole (0.006 M).

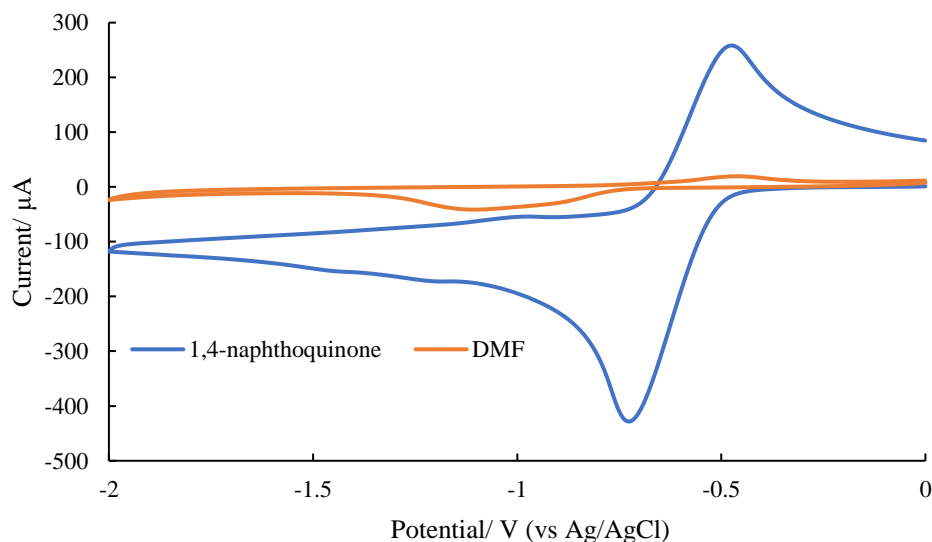

Figure S4. Reduction potential of 1,4-naphthoquinone.

The cyclic voltammograms were recorded in an electrolyte of  $n\text{Bu}_4\text{NBF}_4$  (0.2 M) in DMF using a glassy carbon disk working electrode (diameter, 3 mm), a Pt wire auxiliary electrode and a SCE reference electrode. The scan rate is 100 mV/s. (organe line) DMF,

<sup>n</sup>Bu<sub>4</sub>NBF<sub>4</sub> (0.2 M); (blue line) DMF, <sup>n</sup>Bu<sub>4</sub>NBF<sub>4</sub> (0.2 M), 1,4-naphthoquinone (0.006 M).

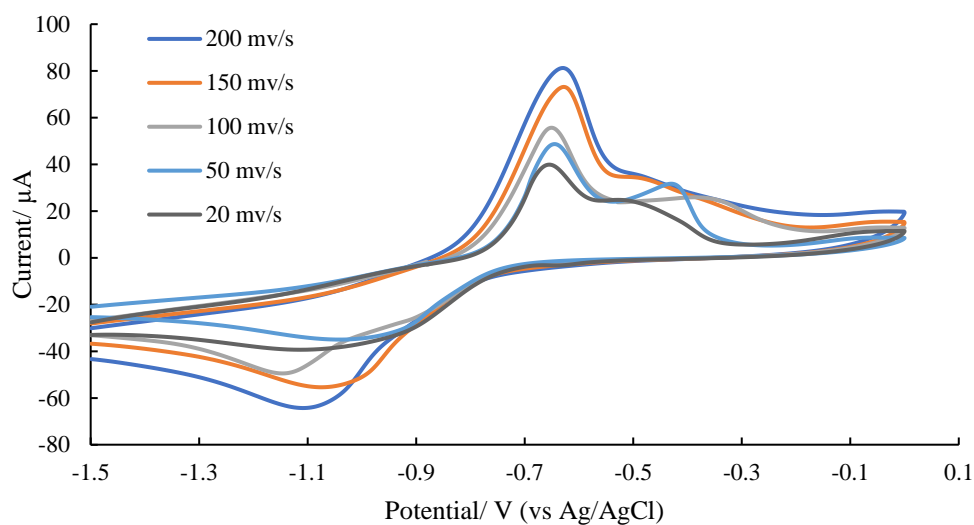

Figure S5. CV tests with different scan rates of DMF.

The cyclic voltammograms were recorded in an electrolyte of <sup>n</sup>Bu<sub>4</sub>NBF<sub>4</sub> (0.2 M) in DMF using a glassy carbon disk working electrode (diameter, 3 mm), a Pt wire auxiliary electrode and a SCE reference electrode. (purple line) 20 mV/s; (bluish line) 50 mV/s; (gray line) 100 mV/s; (orange line) 150 mV/s; (blue line) 200 mV/s.

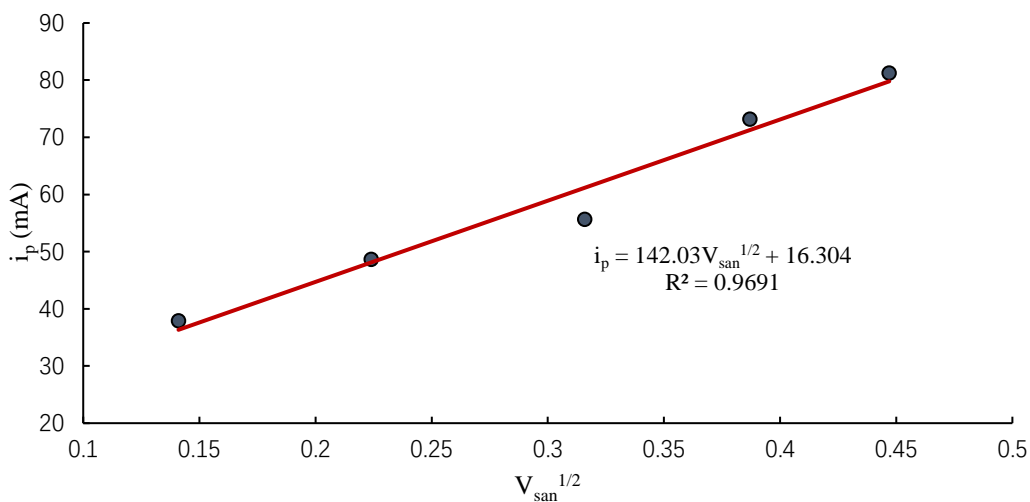

Figure S6. linear fit analysis.

## 5. Analytical data for products

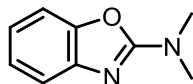

### *N,N*-dimethylbenzo[*d*]oxazol-2-amine (**2a**)

The starting material, benzo[*d*]oxazole (35.7 mg, 0.3 mmol),  $n\text{Bu}_4\text{NBF}_4$  (322.4 mg, 1.0 mmol),  $\text{Ca}(\text{OAc})_2$  (23.7 mg, 0.15 mmol, 0.5 equiv.) were dissolved in 5 mL of DMF. The flask was equipped with graphite rod as the anode and platinum plate as the cathode. The electrolysis was carried out at r.t. using a constant current of 10 mA for 7 hours. The reaction mixture was extracted with EtOAc (15 mL  $\times$  3). The collected organic layers were dried, evaporated and chromatographed through silica gel eluting with ethyl acetate/hexanes (10:1) to afford 41.8 mg yellow solid product **2a** in 86% yield.

m.p. 73.3-81.8 °C.  $^1\text{H}$  NMR (400MHz,  $\text{CDCl}_3$ )  $\delta$  7.35 (d,  $J=7.8$  Hz, 1H), 7.24 (d,  $J=9.6$  Hz, 1H), 7.13-7.17 (m, 1H), 6.98-7.02 (m, 1H), 3.20 (s, 6H).  $^{13}\text{C}$  NMR (100MHz,  $\text{CDCl}_3$ )  $\delta$  163.1, 149.1, 143.6, 123.9, 120.2, 116.0, 108.6, 37.7. The  $^1\text{H}$  and  $^{13}\text{C}$  NMR data match the reported values<sup>[1]</sup>.

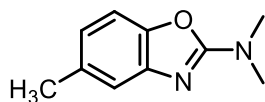

### *N,N,5*-trimethylbenzo[*d*]oxazol-2-amine (**2b**)

The starting material, 5-methylbenzo[*d*]oxazole (39.9 mg, 0.3 mmol),  $n\text{Bu}_4\text{NBF}_4$  (322.4 mg, 1.0 mmol),  $\text{Ca}(\text{OAc})_2$  (23.7 mg, 0.15 mmol, 0.5 equiv.) were dissolved in 5 mL of DMF. The flask was equipped with graphite rod as the anode and platinum plate as the cathode. The electrolysis was carried out at r.t. using a constant current of 10 mA for 7 hours. The reaction mixture was extracted with EtOAc (15 mL  $\times$  3). The collected organic layers were dried, evaporated and chromatographed through silica gel eluting with ethyl acetate/hexanes (10:1) to afford 39.1 mg yellow liquid product **2b** in 74% yield.

$^1\text{H}$  NMR (400MHz,  $\text{CDCl}_3$ )  $\delta$  7.15 (s, 1H), 7.11 (d,  $J=8.1$  Hz, 1H), 6.79 (d,  $J=8.0$  Hz, 1H), 3.19 (s, 6H), 2.38 (s, 3H).  $^{13}\text{C}$  NMR (100MHz,  $\text{CDCl}_3$ )  $\delta$  163.3, 147.2, 143.7, 133.5, 120.8, 116.4, 107.9, 37.7, 21.5. The  $^1\text{H}$  and  $^{13}\text{C}$  NMR data match the reported values<sup>[2]</sup>.

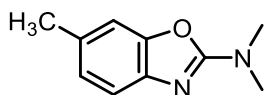

### ***N,N,6*-trimethylbenzo[*d*]oxazol-2-amine (**2c**)**

The starting material, 6-methylbenzo[*d*]oxazole (39.9 mg, 0.3 mmol), <sup>n</sup>Bu<sub>4</sub>NBF<sub>4</sub> (322.4 mg, 1.0 mmol), Ca(OAc)<sub>2</sub> (23.7 mg, 0.15 mmol, 0.5 equiv.) were dissolved in 5 mL of DMF. The flask was equipped with graphite rod as the anode and platinum plate as the cathode. The electrolysis was carried out at r.t. using a constant current of 10 mA for 7 hours. The reaction mixture was extracted with EtOAc (15 mL × 3). The collected organic layers were dried, evaporated and chromatographed through silica gel eluting with ethyl acetate/hexanes (10:1) to afford 38.1 mg brown solid product **2c** in 72% yield. m.p. 45.9-54.5 °C. <sup>1</sup>H NMR (400MHz, CDCl<sub>3</sub>) δ 7.22 (d, *J*=7.9 Hz, 1H), 7.07 (s, 1H), 6.96 (d, *J*=7.9 Hz, 1H), 3.18 (s, 6H), 2.39 (s, 3H). <sup>13</sup>C NMR (100MHz, CDCl<sub>3</sub>) δ 162.9, 149.3, 141.2, 130.2, 124.6, 115.4, 109.2, 37.7, 21.4. The <sup>1</sup>H and <sup>13</sup>C NMR data match the reported values<sup>[3]</sup>.

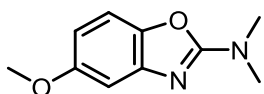

### **5-methoxy-*N,N*-dimethylbenzo[*d*]oxazol-2-amine (**2d**)**

The starting material, 5-methoxybenzo[*d*]oxazole (44.7 mg, 0.3 mmol), <sup>n</sup>Bu<sub>4</sub>NBF<sub>4</sub> (322.4 mg, 1.0 mmol), Ca(OAc)<sub>2</sub> (23.7 mg, 0.15 mmol, 0.5 equiv.) were dissolved in 5 mL of DMF. The flask was equipped with graphite rod as the anode and platinum plate as the cathode. The electrolysis was carried out at r.t. using a constant current of 10 mA for 7 hours. The reaction mixture was extracted with EtOAc (15 mL × 3). The collected organic layers were dried, evaporated and chromatographed through silica gel eluting with ethyl acetate/hexanes (10:1) to afford 36.9 mg yellow liquid product **2d** in 64% yield.

<sup>1</sup>H NMR (400MHz, CDCl<sub>3</sub>) δ 7.11 (d, *J*=8.6 Hz, 1H), 6.92 (d, *J*=2.5 Hz, 1H), 6.56 (dd, *J*<sub>1</sub>=8.7 Hz, *J*<sub>2</sub>=2.6 Hz, 1H), 3.80 (s, 3H), 3.19 (s, 6H). <sup>13</sup>C NMR (100MHz, CDCl<sub>3</sub>) δ 163.8, 157.0, 144.5, 143.6, 108.4, 106.6, 101.2, 55.9, 37.7. The <sup>1</sup>H and <sup>13</sup>C NMR data match the reported values<sup>[1]</sup>.

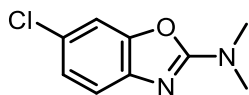

### 6-chloro-*N,N*-dimethylbenzo[*d*]oxazol-2-amine (2e)

The starting material, 6-chlorobenzo[*d*]oxazole (46.1 mg, 0.3 mmol),  $n\text{Bu}_4\text{NBF}_4$  (322.4 mg, 1.0 mmol),  $\text{Ca}(\text{OAc})_2$  (23.7 mg, 0.15 mmol, 0.5 equiv.) were dissolved in 5 mL of DMF. The flask was equipped with graphite rod as the anode and platinum plate as the cathode. The electrolysis was carried out at r.t. using a constant current of 10 mA for 7 hours. The reaction mixture was extracted with EtOAc (15 mL  $\times$  3). The collected organic layers were dried, evaporated and chromatographed through silica gel eluting with ethyl acetate/hexanes (10:1) to afford 43.6 mg yellow solid product **2e** in 74% yield.

m.p. 71.3-78.9 °C.  $^1\text{H}$  NMR (400MHz,  $\text{CDCl}_3$ )  $\delta$  7.29(d,  $J=2.0$  Hz, 1H), 7.13 (d,  $J=8.4$  Hz, 1H), 6.95 (dd,  $J_1=8.4$  Hz,  $J_2=2.0$  Hz, 1H), 3.20 (s, 6H).  $^{13}\text{C}$  NMR (100MHz,  $\text{CDCl}_3$ )  $\delta$  163.8, 147.7, 144.9, 129.2, 120.0, 116.1, 109.1, 37.7. The  $^1\text{H}$  and  $^{13}\text{C}$  NMR data match the reported values<sup>[4]</sup>.

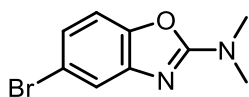

### 5-bromo-*N,N*-dimethylbenzo[*d*]oxazol-2-amine (2f)

The starting material, 5-bromobenzo[*d*]oxazole (59.4 mg, 0.3 mmol),  $n\text{Bu}_4\text{NBF}_4$  (322.4 mg, 1.0 mmol),  $\text{Ca}(\text{OAc})_2$  (23.7 mg, 0.15 mmol, 0.5 equiv.) were dissolved in 5 mL of DMF. The flask was equipped with graphite rod as the anode and platinum plate as the cathode. The electrolysis was carried out at r.t. using a constant current of 10 mA for 7 hours. The reaction mixture was extracted with EtOAc (15 mL  $\times$  3). The collected organic layers were dried, evaporated and chromatographed through silica gel eluting with ethyl acetate/hexanes (10:1) to afford 39.8 mg red liquid product **2f** in 55% yield.  $^1\text{H}$  NMR (400MHz,  $\text{CDCl}_3$ )  $\delta$  7.44 (s, 1H), 7.09 (s, 2H), 3.19 (s, 6H).  $^{13}\text{C}$  NMR (100MHz,  $\text{CDCl}_3$ )  $\delta$  163.5, 148.1, 145.4, 122.7, 118.9, 116.5, 109.6, 37.6. The  $^1\text{H}$  and  $^{13}\text{C}$  NMR data match the reported values<sup>[5]</sup>.

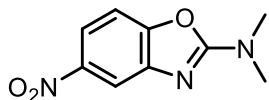

### ***N,N*-dimethyl-5-nitrobenzo[*d*]oxazol-2-amine (2g)**

The starting material, 5-nitrobenzo[*d*]oxazole (49.2 mg, 0.3 mmol), <sup>n</sup>Bu<sub>4</sub>NBF<sub>4</sub> (322.4 mg, 1.0 mmol), Ca(OAc)<sub>2</sub> (23.7 mg, 0.15 mmol, 0.5 equiv.) were dissolved in 5 mL of DMF. The flask was equipped with graphite rod as the anode and platinum plate as the cathode. The electrolysis was carried out at r.t. using a constant current of 10 mA for 7 hours. The reaction mixture was extracted with EtOAc (15 mL × 3). The collected organic layers were dried, evaporated and chromatographed through silica gel eluting with ethyl acetate/hexanes (10:1) to afford 46.6 mg yellow solid product **2g** in 75% yield.

m.p. 160.1-166.3 °C. <sup>1</sup>H NMR (400MHz, CDCl<sub>3</sub>) δ 8.15 (d, *J* = 2.2 Hz, 1H), 7.98 (d, *J*<sub>1</sub> = 8.7 Hz, *J*<sub>2</sub> = 2.2 Hz 1H), 7.30 (d, *J*=8.7 Hz, 1H), 3.25 (s, 6H). <sup>13</sup>C NMR (100MHz, CDCl<sub>3</sub>) δ 164.5, 153.0, 145.2, 144.6, 116.8, 111.5, 108.2, 37.7. The <sup>1</sup>H and <sup>13</sup>C NMR data match the reported values<sup>[1]</sup>.

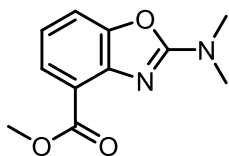

### **methyl 2-(dimethylamino)benzo[*d*]oxazole-4-carboxylate (2h)**

The starting material, methyl benzo[*d*]oxazole-4-carboxylate (53.2 mg, 0.3 mmol), <sup>n</sup>Bu<sub>4</sub>NBF<sub>4</sub> (322.4 mg, 1.0 mmol), Ca(OAc)<sub>2</sub> (23.7 mg, 0.15 mmol, 0.5 equiv.) were dissolved in 5 mL of DMF. The flask was equipped with graphite rod as the anode and platinum plate as the cathode. The electrolysis was carried out at r.t. using a constant current of 10 mA for 7 hours. The reaction mixture was extracted with EtOAc (15 mL × 3). The collected organic layers were dried, evaporated and chromatographed through silica gel eluting with ethyl acetate/hexanes (10:1) to afford 42.9 mg brown solid product **2h** in 65% yield.

m.p. 85.7-94.1 °C. <sup>1</sup>H NMR (400MHz, CDCl<sub>3</sub>) δ 7.81 (d, *J*=8.0 Hz, 1H), 7.38 (d, *J*=7.8 Hz, 1H), 7.01 (dd, *J*<sub>1</sub>=8.0 Hz, *J*<sub>2</sub>=7.9 Hz, 1H), 3.98 (s, 3H), 3.27 (s, 6H). <sup>13</sup>C NMR (100MHz, CDCl<sub>3</sub>) δ 166.3, 164.3, 150.0, 144.6, 126.0, 119.2, 117.5, 112.3, 52.1, 37.8. HRMS (ESI) *m/z*: [M+H]<sup>+</sup> Calcd. for C<sub>11</sub>H<sub>12</sub>N<sub>2</sub>O<sub>3</sub> 221.0921; Found 221.0918.



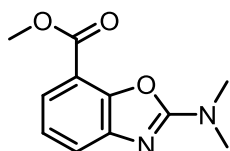

### **methyl 2-(dimethylamino)benzo[d]oxazole-7-carboxylate (2i)**

The starting material, methyl benzo[d]oxazole-7-carboxylate (53.2 mg, 0.3 mmol),  ${}^n\text{Bu}_4\text{NBF}_4$  (322.4 mg, 1.0 mmol),  $\text{Ca}(\text{OAc})_2$  (23.7 mg, 0.15 mmol, 0.5 equiv.) were dissolved in 5 mL of DMF. The flask was equipped with graphite rod as the anode and platinum plate as the cathode. The electrolysis was carried out at r.t. using a constant current of 10 mA for 7 hours. The reaction mixture was extracted with EtOAc (15 mL  $\times$  3). The collected organic layers were dried, evaporated and chromatographed through silica gel eluting with ethyl acetate/hexanes (10:1) to afford 47.6 mg brown solid product **2i** in 72% yield.

m.p. 102.8-108.1 °C.  ${}^1\text{H}$  NMR (400MHz,  $\text{CDCl}_3$ )  $\delta$  7.59 (d,  $J=7.9$ , 1H), 7.51 (d,  $J=7.8$ , 1H), 7.20 (dd,  $J_1=7.9$  Hz,  $J_2=7.8$  Hz, 1H), 3.97 (s, 3H), 3.26 (s, 6H).  ${}^{13}\text{C}$  NMR (100MHz,  $\text{CDCl}_3$ )  $\delta$  165.1, 163.6, 148.3, 145.0, 123.6, 121.8, 120.3, 113.0, 52.1, 37.7. HRMS (ESI)  $m/z$ :  $[\text{M}+\text{H}]^+$  Calcd. for  $\text{C}_{11}\text{H}_{12}\text{N}_2\text{O}_3$  221.0921; Found 221.0918.

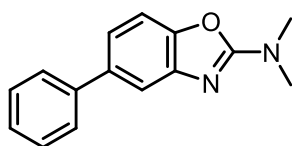

### ***N,N*-dimethyl-5-phenylbenzo[d]oxazol-2-amine (2j)**

The starting material, 5-phenylbenzo[d]oxazole (58.6 mg, 0.3 mmol),  ${}^n\text{Bu}_4\text{NBF}_4$  (322.4 mg, 1.0 mmol),  $\text{Ca}(\text{OAc})_2$  (23.7 mg, 0.15 mmol, 0.5 equiv.) were dissolved in 5 mL of DMF. The flask was equipped with graphite rod as the anode and platinum plate as the cathode. The electrolysis was carried out at r.t. using a constant current of 10 mA for 7 hours. The reaction mixture was extracted with EtOAc (15 mL  $\times$  3). The collected organic layers were dried, evaporated and chromatographed through silica gel eluting with ethyl acetate/hexanes (10:1) to afford 20.7 mg yellow solid product **2j** in 29% yield.

m.p. 113.6-118.9 °C.  ${}^1\text{H}$  NMR (400 MHz,  $\text{CDCl}_3$ )  $\delta$  7.60-7.57 (m, 3H), 7.45-7.41 (m, 2H), 7.34-7.28 (m, 2H), 7.22 (dd,  $J_1=8.2$  Hz,  $J_2=1.6$  Hz, 1H), 3.23 (s, 6H).  ${}^{13}\text{C}$  NMR (100 MHz,  $\text{CDCl}_3$ )  $\delta$  163.5, 148.7, 144.2, 141.7, 137.7, 128.7, 127.3, 126.8, 119.6, 114.7, 108.5, 37.7. The  ${}^1\text{H}$  and  ${}^{13}\text{C}$  NMR data match the reported values<sup>[2]</sup>.

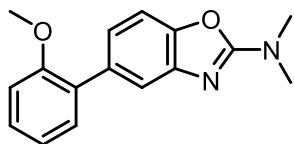

### 5-(2-methoxyphenyl)-*N,N*-dimethylbenzo[*d*]oxazol-2-amine (**2k**)

The starting material, 5-(3-methoxyphenyl)benzo[*d*]oxazole (67.6 mg, 0.3 mmol),  ${}^n\text{Bu}_4\text{NBF}_4$  (322.4 mg, 1.0 mmol),  $\text{Ca}(\text{OAc})_2$  (23.7 mg, 0.15 mmol, 0.5 equiv.) were dissolved in 5 mL of DMF. The flask was equipped with graphite rod as the anode and platinum plate as the cathode. The electrolysis was carried out at r.t. using a constant current of 10 mA for 7 hours. The reaction mixture was extracted with EtOAc (15 mL  $\times$  3). The collected organic layers were dried, evaporated and chromatographed through silica gel eluting with ethyl acetate/hexanes (10:1) to afford 20.1 mg brown solid product **2k** in 25% yield.

m.p. 120.7-128.3 °C.  ${}^1\text{H}$  NMR (400MHz,  $\text{CDCl}_3$ )  $\delta$  7.54 (s, 1H), 7.34-7.27 (m, 3H), 7.15 (d,  $J = 6.5$  Hz, 1H), 7.04-6.97 (m, 2H), 3.80 (s, 3H), 3.21 (s, 6H).  ${}^{13}\text{C}$  NMR (100MHz,  $\text{CDCl}_3$ )  $\delta$  163.3, 156.4, 148.3, 143.3, 134.4, 131.1, 131.1, 128.3, 121.9, 120.8, 117.4, 111.2, 108.0, 55.5, 37.7. HRMS (ESI)  $m/z$ :  $[\text{M}+\text{H}]^+$  Calcd. for  $\text{C}_{16}\text{H}_{16}\text{N}_2\text{O}_2$  269.1285; Found 269.1288.

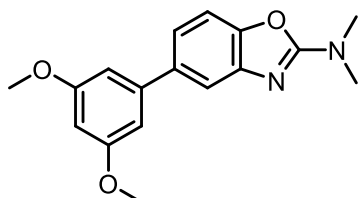

### 5-(3,5-dimethoxyphenyl)-*N,N*-dimethylbenzo[*d*]oxazol-2-amine (**2l**)

The starting material, 5-(3,5-dimethoxyphenyl)benzo[*d*]oxazole (76.6 mg, 0.3 mmol),  ${}^n\text{Bu}_4\text{NBF}_4$  (322.4 mg, 1.0 mmol),  $\text{Ca}(\text{OAc})_2$  (23.7 mg, 0.15 mmol, 0.5 equiv.) were dissolved in 5 mL of DMF. The flask was equipped with graphite rod as the anode and platinum plate as the cathode. The electrolysis was carried out at r.t. using a constant current of 10 mA for 7 hours. The reaction mixture was extracted with EtOAc (15 mL  $\times$  3). The collected organic layers were dried, evaporated and chromatographed through silica gel eluting with ethyl acetate/hexanes (10:1) to afford 22.4 mg brown liquid product **2l** in 25% yield.

${}^1\text{H}$  NMR (400MHz,  $\text{CDCl}_3$ )  $\delta$  7.56 (s, 1H), 7.27 (d,  $J = 9.7$  Hz, 1H), 7.21 (d,  $J = 8.2$  Hz, 1H), 6.74 (s, 1H), 6.45 (s, 1H), 3.84 (s, 6H), 3.22 (s, 6H).  ${}^{13}\text{C}$  NMR (100 MHz,  $\text{CDCl}_3$ )  $\delta$  163.5, 160.9, 148.9, 144.1, 143.9, 137.6, 119.6, 114.7, 108.5, 105.5, 99.0,

55.4, 37.7. HRMS (ESI)  $m/z$ :  $[M+H]^+$  Calcd. for  $C_{17}H_{18}N_2O_3$  299.1391; Found 299.1390.

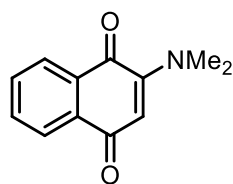

### 2-(dimethylamino)naphthalene-1,4-dione (**4a**)

The starting material, naphthalene-1,4-dione (47.5 mg, 0.3 mmol),  ${}^n\text{Bu}_4\text{NBF}_4$  (322.4 mg, 1.0 mmol), NaOAc (24.6 mg, 0.3 mmol, 1.0 equiv.) were dissolved in 5 mL of DMF. The flask was equipped with platinum plates as the anode and cathode. The electrolysis was carried out at r.t. using a constant current of 10 mA for 2 hours. The reaction mixture was extracted with EtOAc (15 mL  $\times$  3). The collected organic layers were dried, evaporated and chromatographed through silica gel eluting with ethyl acetate/hexanes (2:1) to afford 54.3 mg red solid product **4a** in 90% yield.

The starting material, naphthalene-1,4-diol (48.1 mg, 0.3 mmol),  ${}^n\text{Bu}_4\text{NBF}_4$  (322.4 mg, 1.0 mmol), NaOAc (24.6 mg, 0.3 mmol, 1.0 equiv.) were dissolved in 5 mL of DMF. The flask was equipped with platinum plates as the anode and cathode. The electrolysis was carried out at r.t. using a constant current of 10 mA for 2 hours. The reaction mixture was extracted with EtOAc (15 mL  $\times$  3). The collected organic layers were dried, evaporated and chromatographed through silica gel eluting with ethyl acetate/hexanes (2:1) to afford 45.9 mg red solid product **4a** in 76% yield.

The starting material, naphthalen-1-ol (43.2 mg, 0.3 mmol),  ${}^n\text{Bu}_4\text{NBF}_4$  (322.4 mg, 1.0 mmol), NaOAc (24.6 mg, 0.3 mmol, 1.0 equiv.) were dissolved in 5 mL of DMF. The flask was equipped with platinum plates as the anode and cathode. The electrolysis was carried out at r.t. using a constant current of 10 mA for 2 hours. The reaction mixture was extracted with EtOAc (15 mL  $\times$  3). The collected organic layers were dried, evaporated and chromatographed through silica gel eluting with ethyl acetate/hexanes (2:1) to afford 36.8 mg red solid product **4a** in 61% yield.

m.p. 102-108 °C.  ${}^1\text{H}$  NMR (400 MHz,  $\text{CDCl}_3$ )  $\delta$  8.05 (d,  $J = 7.5$  Hz, 1H), 7.99 (d,  $J = 7.5$  Hz, 1H), 7.69 (dd,  $J_1 = 11.6$  Hz,  $J_2 = 4.2$  Hz, 1H), 7.62 (dd,  $J_1 = 10.8$  Hz,  $J_2 = 4.2$  Hz, 1H), 5.85 (s, 1H), 3.22 (s, 6H).  ${}^{13}\text{C}$  NMR (100 MHz,  $\text{CDCl}_3$ )  $\delta$  183.4, 182.7, 152.4, 133.8, 132.7, 132.4, 131.9, 126.4, 125.3, 106.8, 42.5. The  ${}^1\text{H}$  and  ${}^{13}\text{C}$  NMR data match the reported values<sup>[6]</sup>.

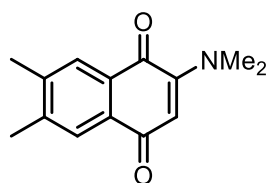

### 2-(dimethylamino)-6,7-dimethylnaphthalene-1,4-dione (**4b**)

The starting material, 6,7-dimethylnaphthalene-1,4-dione (55.8 mg, 0.3 mmol),  $n\text{Bu}_4\text{NBF}_4$  (322.4 mg, 1.0 mmol), NaOAc (24.6 mg, 0.3 mmol, 1.0 equiv.) were dissolved in 5 mL of DMF. The flask was equipped with platinum plates as the anode and cathode. The electrolysis was carried out at r.t. using a constant current of 10 mA for 2 hours. The reaction mixture was extracted with EtOAc (15 mL  $\times$  3). The collected organic layers were dried, evaporated and chromatographed through silica gel eluting with ethyl acetate/hexanes (2:1) to afford 44.7 mg red solid product **4b** in 65% yield.

The starting material, 6,7-dimethylnaphthalene-1,4-diol (56.4 mg, 0.3 mmol),  $n\text{Bu}_4\text{NBF}_4$  (322.4 mg, 1.0 mmol), NaOAc (24.6 mg, 0.3 mmol, 1.0 equiv.) were dissolved in 5 mL of DMF. The flask was equipped with platinum plates as the anode and cathode. The electrolysis was carried out at r.t. using a constant current of 10 mA for 2 hours. The reaction mixture was extracted with EtOAc (15 mL  $\times$  3). The collected organic layers were dried, evaporated and chromatographed through silica gel eluting with ethyl acetate/hexanes (2:1) to afford 31.0 mg red solid product **4b** in 45% yield.

m.p. 153-156 °C.  $^1\text{H}$  NMR (400 MHz,  $\text{CDCl}_3$ )  $\delta$  7.77 (s, 1H), 7.71 (s, 1H), 5.76 (s, 1H), 3.19 (s, 6H), 2.36 (s, 3H), 2.35 (s, 3H).  $^{13}\text{C}$  NMR (100 MHz,  $\text{CDCl}_3$ )  $\delta$  183.6, 183.3, 152.6, 143.6, 141.3, 130.7, 130.4, 127.5, 126.4, 106.9, 42.5, 20.1, 19.9. HRMS (ESI) m/z:  $[\text{M}+\text{H}]^+$  Calcd. for  $\text{C}_{14}\text{H}_{15}\text{NO}_2$  230.1176; Found 230.1173.

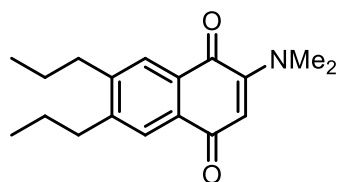

### 2-(dimethylamino)-6,7-dipropylnaphthalene-1,4-dione (**4c**)

The starting material, 6,7-dipropylnaphthalene-1,4-dione (72.6 mg, 0.3 mmol),  $n\text{Bu}_4\text{NBF}_4$  (322.4 mg, 1.0 mmol), NaOAc (24.6 mg, 0.3 mmol, 1.0 equiv.) were dissolved in 5 mL of DMF. The flask was equipped with platinum plates as the anode and cathode. The electrolysis was carried out at r.t. using a constant current of 10 mA for 2 hours. The reaction mixture was extracted with EtOAc (15 mL  $\times$  3). The collected

organic layers were dried, evaporated and chromatographed through silica gel eluting with ethyl acetate/hexanes (2:1) to afford 29.9 mg red solid product **4c** in 35% yield. m.p. 78-80 °C. <sup>1</sup>H NMR (400 MHz, CDCl<sub>3</sub>) δ 7.81 (s, 1H), 7.76 (s, 1H), 5.79 (s, 1H), 3.21 (s, 6H), 2.72-2.66 (m, 4H), 1.72-1.62 (m, 4H), 1.04-0.99 (m, 6H). <sup>13</sup>C NMR (100 MHz, CDCl<sub>3</sub>) δ 183.6, 183.3, 152.7, 147.5, 145.1, 130.5, 130.3, 127.2, 126.1, 106.9, 42.5, 34.9, 34.6, 23.8, 14.1, 14.1. HRMS (ESI) m/z: [M+H]<sup>+</sup> Calcd. for C<sub>18</sub>H<sub>23</sub>NO<sub>2</sub> 286.1802; Found 286.1805.

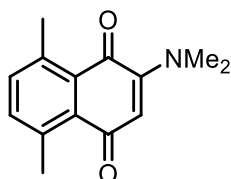

#### 2-(dimethylamino)-5,8-dimethylnaphthalene-1,4-dione (**4d**)

The starting material, 5,8-dimethylnaphthalene-1,4-dione (55.8 mg, 0.3 mmol), <sup>n</sup>Bu<sub>4</sub>NBF<sub>4</sub> (322.4 mg, 1.0 mmol), NaOAc (24.6 mg, 0.3 mmol, 1.0 equiv.) were dissolved in 5 mL of DMF. The flask was equipped with platinum plates as the anode and cathode. The electrolysis was carried out at r.t. using a constant current of 10 mA for 2 hours. The reaction mixture was extracted with EtOAc (15 mL × 3). The collected organic layers were dried, evaporated and chromatographed through silica gel eluting with ethyl acetate/hexanes (2:1) to afford 26.1 mg red solid product **4d** in 38% yield. m.p. 86-91 °C. <sup>1</sup>H NMR (400 MHz, CDCl<sub>3</sub>) δ 7.30-7.23 (m, 2H), 5.66 (s, 1H), 3.10 (s, 6H), 2.70 (s, 3H), 2.58 (s, 3H). <sup>13</sup>C NMR (100 MHz, CDCl<sub>3</sub>) δ 186.5, 185.9, 154.4, 137.8, 137.6, 136.9, 134.8, 132.7, 131.4, 106.4, 41.4, 22.8, 22.1. HRMS (ESI) m/z: [M+H]<sup>+</sup> Calcd. for C<sub>14</sub>H<sub>15</sub>NO<sub>2</sub> 230.1176; Found 230.1175.

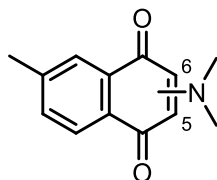

#### 2-(dimethylamino)-7-methylnaphthalene-1,4-dione and 2-(dimethylamino)-6-methylnaphthalene-1,4-dione (**4e**)

The starting material, 6-methylnaphthalene-1,4-dione (51.6 mg, 0.3 mmol), <sup>n</sup>Bu<sub>4</sub>NBF<sub>4</sub> (322.4 mg, 1.0 mmol), NaOAc (24.6 mg, 0.3 mmol, 1.0 equiv.) were dissolved in 5 mL of DMF. The flask was equipped with platinum plates as the anode and cathode. The electrolysis was carried out at r.t. using a constant current of 10 mA for 2 hours. The

reaction mixture was extracted with EtOAc (15 mL  $\times$  3). The collected organic layers were dried, evaporated and chromatographed through silica gel eluting with ethyl acetate/hexanes (2:1) to afford 43.9 mg orange solid product **4e** in 68% yield (isomeric mixture of C6/C5 = 1:1).

m.p. 85-91 °C.  $^1\text{H}$  NMR (400 MHz,  $\text{CDCl}_3$ )  $\delta$  7.93-7.86 (m, 1H), 7.83-7.76 (m, 1H), 7.48-7.38 (m, 1H), 5.79 (s, 1H), 3.20 (s, 6H), 2.45 (s, 3H).  $^{13}\text{C}$  NMR (100 MHz,  $\text{CDCl}_3$ )  $\delta$  183.8, 183.3, 183.0, 182.9, 152.5, 145.0, 142.6, 134.5, 132.7, 132.6, 132.4, 130.5, 130.2, 126.8, 126.7, 125.8, 125.5, 107.0, 106.8, 42.5, 42.4, 21.8, 21.5. HRMS (ESI)  $m/z$ :  $[\text{M}+\text{H}]^+$  Calcd. for  $\text{C}_{13}\text{H}_{13}\text{NO}_2$  216.1020; Found 216.1018.

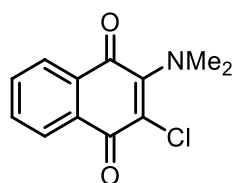

#### 2-chloro-3-(dimethylamino)naphthalene-1,4-dione (**4f**)

The starting material, 2,3-dichloronaphthalene-1,4-dione (68.1 mg, 0.3 mmol),  $^n\text{Bu}_4\text{NBF}_4$  (322.4 mg, 1.0 mmol), NaOAc (24.6 mg, 0.3 mmol, 1.0 equiv.) were dissolved in 5 mL of DMF. The flask was equipped with platinum plates as the anode and cathode. The electrolysis was carried out at r.t. using a constant current of 10 mA for 2 hours. The reaction mixture was extracted with EtOAc (15 mL  $\times$  3). The collected organic layers were dried, evaporated and chromatographed through silica gel eluting with ethyl acetate/hexanes (10:1) to afford 27.6 mg red solid product **4f** in 39% yield.

m.p. 73-75 °C.  $^1\text{H}$  NMR (400 MHz,  $\text{CDCl}_3$ )  $\delta$  8.11 (d,  $J = 7.7$  Hz, 1H), 8.00 (d,  $J = 7.5$  Hz, 1H), 7.71-7.63 (m, 2H), 3.25 (s, 6H).  $^{13}\text{C}$  NMR (100 MHz,  $\text{CDCl}_3$ )  $\delta$  182.2, 177.9, 151.0, 134.0, 132.8, 131.7, 131.4, 126.8, 126.4, 120.2, 44.4. The  $^1\text{H}$  and  $^{13}\text{C}$  NMR data match the reported values<sup>[7]</sup>.

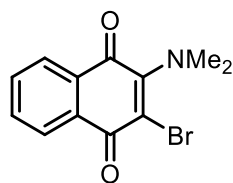

#### 2-bromo-3-(dimethylamino)naphthalene-1,4-dione (**4g**)

The starting material, 2,3-dibromonaphthalene-1,4-dione (94.8 mg, 0.3 mmol),  $^n\text{Bu}_4\text{NBF}_4$  (322.4 mg, 1.0 mmol), NaOAc (24.6 mg, 0.3 mmol, 1.0 equiv.) were dissolved in 5 mL of DMF. The flask was equipped with platinum plates as the anode

and cathode. The electrolysis was carried out at r.t. using a constant current of 10 mA for 2 hours. The reaction mixture was extracted with EtOAc (15 mL  $\times$  3). The collected organic layers were dried, evaporated and chromatographed through silica gel eluting with ethyl acetate/hexanes (10:1) to afford 39.5 mg red solid product **4g** in 47% yield. m.p. 59-63 °C.  $^1\text{H}$  NMR (400 MHz,  $\text{CDCl}_3$ )  $\delta$  8.09 (dd,  $J_1 = 7.6$  Hz,  $J_2 = 1.2$  Hz, 1H), 7.97 (dd,  $J_1 = 7.6$  Hz,  $J_2 = 1.2$  Hz, 1H), 7.69-7.61 (m, 2H), 3.25 (s, 6H).  $^{13}\text{C}$  NMR (100 MHz,  $\text{CDCl}_3$ )  $\delta$  181.8, 177.9, 153.5, 133.9, 132.7, 131.3, 131.2, 126.7, 126.6, 112.9, 44.7. The  $^1\text{H}$  and  $^{13}\text{C}$  NMR data match the reported values<sup>[8]</sup>.

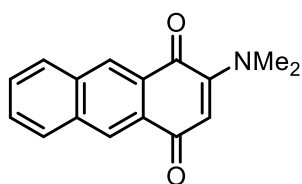

#### 2-(dimethylamino)anthracene-1,4-dione (**4h**)

The starting material, anthracene-1,4-dione (62.5 mg, 0.3 mmol),  $^t\text{Bu}_4\text{NBF}_4$  (322.4 mg, 1.0 mmol), NaOAc (24.6 mg, 0.3 mmol, 1.0 equiv.) were dissolved in 5 mL of DMF. The flask was equipped with platinum plates as the anode and cathode. The electrolysis was carried out at r.t. using a constant current of 10 mA for 2 hours. The reaction mixture was extracted with EtOAc (15 mL  $\times$  3). The collected organic layers were dried, evaporated and chromatographed through silica gel eluting with ethyl acetate/hexanes (2:1) to afford 55.8 mg red solid product **4h** in 74% yield.

The starting material, anthracene-1,4-diol (63.1 mg, 0.3 mmol),  $^t\text{Bu}_4\text{NBF}_4$  (322.4 mg, 1.0 mmol), NaOAc (24.6 mg, 0.3 mmol, 1.0 equiv.) were dissolved in 5 mL of DMF. The flask was equipped with platinum plates as the anode and cathode. The electrolysis was carried out at r.t. using a constant current of 10 mA for 2 hours. The reaction mixture was extracted with EtOAc (15 mL  $\times$  3). The collected organic layers were dried, evaporated and chromatographed through silica gel eluting with ethyl acetate/hexanes (2:1) to afford 35.4 mg red solid product **4h** in 47% yield.

m.p. 81-90 °C.  $^1\text{H}$  NMR (400 MHz,  $\text{CDCl}_3$ )  $\delta$  8.49 (d,  $J = 11.2$  Hz, 2H), 7.99 (d,  $J = 1.9$  Hz, 2H), 7.61 (s, 2H), 5.95 (s, 1H), 3.24 (s, 6H).  $^{13}\text{C}$  NMR (100 MHz,  $\text{CDCl}_3$ )  $\delta$  183.0, 182.4, 153.4, 135.1, 134.1, 129.8, 129.7, 129.6, 129.2, 129.1, 128.9, 128.4, 126.6, 108.7, 42.5. The  $^1\text{H}$  and  $^{13}\text{C}$  NMR data match the reported values<sup>[9]</sup>.

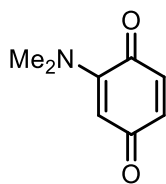

### 2-(dimethylamino)cyclohexa-2,5-diene-1,4-dione (**4i**)

The starting material, benzoquinone (32.4 mg, 0.3 mmol),  ${}^n\text{Bu}_4\text{NBF}_4$  (322.4 mg, 1.0 mmol), NaOAc (24.6 mg, 0.3 mmol, 1.0 equiv.) were dissolved in 5 mL of DMF. The flask was equipped with platinum plates as the anode and cathode. The electrolysis was carried out at r.t. using a constant current of 10 mA for 2 hours. The reaction mixture was extracted with EtOAc (15 mL  $\times$  3). The collected organic layers were dried, evaporated and chromatographed through silica gel eluting with ethyl acetate/hexanes (4:1) to afford 24.9 mg red solid product **4i** in 55% yield.

The starting material, hydroquinone (33.0 mg, 0.3 mmol),  ${}^n\text{Bu}_4\text{NBF}_4$  (322.4 mg, 1.0 mmol), NaOAc (24.6 mg, 0.3 mmol, 1.0 equiv.) were dissolved in 5 mL of DMF. The flask was equipped with platinum plates as the anode and cathode. The electrolysis was carried out at r.t. using a constant current of 10 mA for 2 hours. The reaction mixture was extracted with EtOAc (15 mL  $\times$  3). The collected organic layers were dried, evaporated and chromatographed through silica gel eluting with ethyl acetate/hexanes (4:1) to afford 40.8 mg red solid product **4i** in 90% yield.

m.p. 124-128 °C.  ${}^1\text{H}$  NMR (400 MHz,  $\text{CDCl}_3$ )  $\delta$  6.63 (d,  $J = 9.9$  Hz, 1H), 6.53 (d,  $J = 9.9$  Hz, 1H), 5.61 (s, 1H), 3.17 (s, 6H).  ${}^{13}\text{C}$  NMR (100 MHz,  $\text{CDCl}_3$ )  $\delta$  185.3, 185.2, 150.4, 137.9, 134.2, 104.4, 42.3. The  ${}^1\text{H}$  and  ${}^{13}\text{C}$  NMR data match the reported values<sup>[10]</sup>.

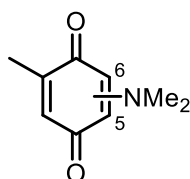

The starting material, 2-methylcyclohexa-2,5-diene-1,4-dione (36.6 mg, 0.3 mmol),  ${}^n\text{Bu}_4\text{NBF}_4$  (322.4 mg, 1.0 mmol), NaOAc (24.6 mg, 0.3 mmol, 1.0 equiv.) were dissolved in 5 mL of DMF. The flask was equipped with platinum plates as the anode and cathode. The electrolysis was carried out at r.t. using a constant current of 10 mA for 2 hours. The reaction mixture was extracted with EtOAc (15 mL  $\times$  3). The collected organic layers were dried, evaporated and chromatographed through silica gel eluting with ethyl acetate/hexanes (4:1) to afford 49.5 mg red solid product **4j** in 99% yield



(C6/C5 = 1:1).

The starting material, 2-methylbenzene-1,4-diol (37.2 mg, 0.3 mmol),  $n\text{Bu}_4\text{NBF}_4$  (322.4 mg, 1.0 mmol), NaOAc (24.6 mg, 0.3 mmol, 1.0 equiv.) were dissolved in 5 mL of DMF. The flask was equipped with platinum plates as the anode and cathode. The electrolysis was carried out at r.t. using a constant current of 10 mA for 2 hours. The reaction mixture was extracted with EtOAc (15 mL  $\times$  3). The collected organic layers were dried, evaporated and chromatographed through silica gel eluting with ethyl acetate/hexanes (4:1) to afford 29.7 mg red solid product **4j** in 60% yield (C6/C5 = 1:1).

**2-(dimethylamino)-5-methylcyclohexa-2,5-diene-1,4-dione (4j, 6-NMe<sub>2</sub>)**

m.p. 126-129 °C.  $^1\text{H}$  NMR (400 MHz,  $\text{CDCl}_3$ )  $\delta$  6.44 (d,  $J$  = 1.6 Hz, 1H), 5.53 (d,  $J$  = 2.2 Hz, 1H), 3.11 (s, 6H), 2.00 (s, 3H).  $^{13}\text{C}$  NMR (100 MHz,  $\text{CDCl}_3$ )  $\delta$  185.9, 185.6, 151.2, 142.7, 134.5, 104.5, 42.3, 15.8.

**2-(dimethylamino)-6-methylcyclohexa-2,5-diene-1,4-dione (4j, 5-NMe<sub>2</sub>)**

m.p. 130-132 °C.  $^1\text{H}$  NMR (400 MHz,  $\text{CDCl}_3$ )  $\delta$  6.35 (s, 1H), 5.56 (s, 1H), 3.12 (s, 6H), 2.02 (s, 3H).  $^{13}\text{C}$  NMR (100 MHz,  $\text{CDCl}_3$ )  $\delta$  185.4, 185.4, 150.7, 147.4, 131.1, 104.33, 42.33, 15.7. The  $^1\text{H}$  and  $^{13}\text{C}$  NMR data match the reported values<sup>[11]</sup>.

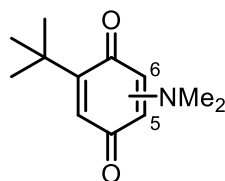

The starting material, 2-(tert-butyl)cyclohexa-2,5-diene-1,4-dione (49.3 mg, 0.3 mmol),  $n\text{Bu}_4\text{NBF}_4$  (322.4 mg, 1.0 mmol), NaOAc (24.6 mg, 0.3 mmol, 1.0 equiv.) were dissolved in 5 mL of DMF. The flask was equipped with platinum plates as the anode and cathode. The electrolysis was carried out at r.t. using a constant current of 10 mA for 2 hours. The reaction mixture was extracted with EtOAc (15 mL  $\times$  3). The collected organic layers were dried, evaporated and chromatographed through silica gel eluting with ethyl acetate/hexanes (4:1) to afford 37.3 mg orange solid product **4k** in 60% yield (C6/C5 = 7:1).

The starting material, 2-(tert-butyl)benzene-1,4-diol (49.9 mg, 0.3 mmol),  $n\text{Bu}_4\text{NBF}_4$  (322.4 mg, 1.0 mmol), NaOAc (24.6 mg, 0.3 mmol, 1.0 equiv.) were dissolved in 5 mL of DMF. The flask was equipped with platinum plates as the anode and cathode. The electrolysis was carried out at r.t. using a constant current of 10 mA for 2 hours. The reaction mixture was extracted with EtOAc (15 mL  $\times$  3). The collected organic layers

were dried, evaporated and chromatographed through silica gel eluting with ethyl acetate/hexanes (10:1) to afford 53.5 mg orange solid product **4k** in 86% yield (C6/C5 = 7:1).

**2-(tert-butyl)-5-(dimethylamino)cyclohexa-2,5-diene-1,4-dione (4k, 6-NMe<sub>2</sub>)**

m.p. 99-102 °C. <sup>1</sup>H NMR (400 MHz, CDCl<sub>3</sub>) δ 6.43 (d, *J* = 2.4 Hz, 1H), 5.50 (d, *J* = 1.9 Hz, 1H), 3.07 (s, 6H), 1.27 (s, 9H). <sup>13</sup>C NMR (100 MHz, CDCl<sub>3</sub>) δ 186.0, 185.7, 153.6, 153.5, 132.8, 103.1, 42.1, 35.0, 29.2. The <sup>1</sup>H and <sup>13</sup>C NMR data match the reported values<sup>[12]</sup>.

**2-(tert-butyl)-6-(dimethylamino)cyclohexa-2,5-diene-1,4-dione (4k, 5-NMe<sub>2</sub>)**

m.p. 100-102 °C. <sup>1</sup>H NMR (400 MHz, CDCl<sub>3</sub>) δ 6.33 (s, 1H), 5.50 (s, 1H), 3.09 (s, 6H), 1.29 (s, 9H). <sup>13</sup>C NMR (100 MHz, CDCl<sub>3</sub>) δ 186.4, 185.6, 157.0, 149.5, 129.6, 106.7, 41.9, 35.1, 29.5. The <sup>1</sup>H and <sup>13</sup>C NMR data match the reported values<sup>[7]</sup>.

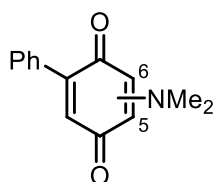

The starting material, [1,1'-biphenyl]-2,5-dione (55.3 mg, 0.3 mmol), <sup>n</sup>Bu<sub>4</sub>NBF<sub>4</sub> (322.4 mg, 1.0 mmol), NaOAc (24.6 mg, 0.3 mmol, 1.0 equiv.) were dissolved in 5 mL of DMF. The flask was equipped with platinum plates as the anode and cathode. The electrolysis was carried out at r.t. using a constant current of 10 mA for 2 hours. The reaction mixture was extracted with EtOAc (15 mL × 3). The collected organic layers were dried, evaporated and chromatographed through silica gel eluting with ethyl acetate/hexanes (4:1) to afford 50.5 mg red solid product **4l** in 74% yield (C6/C5 = 3:1). The starting material, [1,1'-biphenyl]-2,5-diol (55.9 mg, 0.3 mmol), <sup>n</sup>Bu<sub>4</sub>NBF<sub>4</sub> (322.4 mg, 1.0 mmol), NaOAc (24.6 mg, 0.3 mmol, 1.0 equiv.) were dissolved in 5 mL of DMF. The flask was equipped with platinum plates as the anode and cathode. The electrolysis was carried out at r.t. using a constant current of 10 mA for 2 hours. The reaction mixture was extracted with EtOAc (15 mL × 3). The collected organic layers were dried, evaporated and chromatographed through silica gel eluting with ethyl acetate/hexanes (4:1) to afford 28.6 mg red solid product **4l** in 42% yield (C6/C5 = 3:1).

**2-(dimethylamino)-5-methylcyclohexa-2,5-diene-1,4-dione (4l, 6-NMe<sub>2</sub>)**

m.p. 98-100 °C. <sup>1</sup>H NMR (400 MHz, CDCl<sub>3</sub>) δ 7.42 (s, 5H), 6.71 (d, *J* = 2.6 Hz, 1H), 5.65 (d, *J* = 2.4 Hz, 1H), 3.15 (s, 6H). <sup>13</sup>C NMR (100 MHz, CDCl<sub>3</sub>) δ 185.1, 151.8,

144.1, 134.1, 133.5, 129.4, 128.9, 128.4, 104.2, 42.4. HRMS (ESI)  $m/z$ :  $[M+H]^+$  Calcd. for  $C_{14}H_{13}NO_2$  228.1020; Found 228.1022.

#### 2-(dimethylamino)-6-methylcyclohexa-2,5-diene-1,4-dione (**4l**, 5-NMe<sub>2</sub>)

m.p. 103-105 °C. <sup>1</sup>H NMR (400 MHz, CDCl<sub>3</sub>)  $\delta$  7.51 (dd,  $J_1 = 6.7$  Hz,  $J_2 = 3.0$  Hz, 2H), 7.42-7.41 (m, 3H), 6.61 (s, 1H), 5.69 (s, 1H), 3.18 (s, 6H). <sup>13</sup>C NMR (100 MHz, CDCl<sub>3</sub>)  $\delta$  185.5, 184.2, 150.3, 146.6, 133.5, 130.9, 129.7, 129.6, 129.5, 128.2, 104.8, 42.3. HRMS (ESI)  $m/z$ :  $[M+H]^+$  Calcd. for  $C_{14}H_{13}NO_2$  228.1020; Found 228.1022.

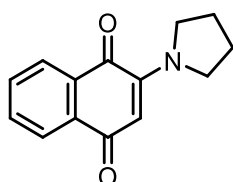

#### 2-(pyrrolidin-1-yl)naphthalene-1,4-dione (**4m**)

The starting material, naphthalene-1,4-dione (47.5 mg, 0.3 mmol), <sup>n</sup>Bu<sub>4</sub>NBF<sub>4</sub> (322.4 mg, 1.0 mmol), NaOAc (24.6 mg, 0.3 mmol, 1.0 equiv.) were dissolved in 5 mL of pyrrolidine-1-carbaldehyde. The flask was equipped with platinum plates as the anode and cathode. The electrolysis was carried out at r.t. using a constant current of 10 mA for 2 hours. The reaction mixture was extracted with EtOAc (15 mL  $\times$  3). The collected organic layers were dried, evaporated and chromatographed through silica gel eluting with ethyl acetate/hexanes (2:1) to afford 27.3 mg orange solid product **4m** in 40% yield.

m.p. 143-146 °C. <sup>1</sup>H NMR (400 MHz, CDCl<sub>3</sub>)  $\delta$  8.07 (d,  $J = 7.6$  Hz, 1H), 8.01 (d,  $J = 7.7$  Hz, 1H), 7.69 (dd,  $J_1 = 7.6$  Hz,  $J_2 = 7.2$  Hz, 1H), 7.60 (dd,  $J_1 = 7.6$  Hz,  $J_2 = 7.2$  Hz, 1H), 5.75 (s, 1H), 3.90-3.47 (m, 4H), 2.02-1.98 (m, 4H). <sup>13</sup>C NMR (100 MHz, CDCl<sub>3</sub>)  $\delta$  183.3, 182.4, 149.0, 134.0, 133.2, 131.8, 131.6, 126.3, 125.4, 104.7, 51.0, 29.7. The <sup>1</sup>H and <sup>13</sup>C NMR data match the reported values<sup>[13]</sup>.

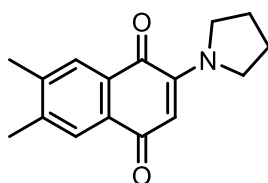

#### 6,7-dimethyl-2-(pyrrolidin-1-yl)naphthalene-1,4-dione (**4n**)

The starting material, 6,7-dimethylnaphthalene-1,4-dione (55.8 mg, 0.3 mmol), <sup>n</sup>Bu<sub>4</sub>NBF<sub>4</sub> (322.4 mg, 1.0 mmol), NaOAc (24.6 mg, 0.3 mmol, 1.0 equiv.) were dissolved in 5 mL of pyrrolidine-1-carbaldehyde. The flask was equipped with platinum

plates as the anode and cathode. The electrolysis was carried out at r.t. using a constant current of 10 mA for 2 hours. The reaction mixture was extracted with EtOAc (15 mL  $\times$  3). The collected organic layers were dried, evaporated and chromatographed through silica gel eluting with ethyl acetate/hexanes (2:1) to afford 25.3 mg red solid product **4n** in 33% yield.

m.p. 70-77 °C.  $^1\text{H}$  NMR (400 MHz,  $\text{CDCl}_3$ )  $\delta$  7.80 (s, 1H), 7.74 (s, 1H), 5.67 (s, 1H), 3.92-3.43 (m, 4H), 2.37 (s, 3H), 2.35 (s, 3H), 2.00-1.97 (m, 4H).  $^{13}\text{C}$  NMR (100 MHz,  $\text{CDCl}_3$ )  $\delta$  183.4, 182.9, 149.1, 143.8, 140.9, 131.1, 129.7, 127.4, 126.5, 104.5, 50.8, 29.7, 20.1, 19.9. HRMS (ESI) m/z:  $[\text{M}+\text{H}]^+$  Calcd. for  $\text{C}_{16}\text{H}_{17}\text{NO}_2$  256.1333; Found 256.1329.

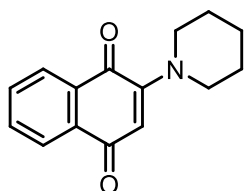

#### 2-(piperidin-1-yl)naphthalene-1,4-dione (**4o**)

The starting material, naphthalene-1,4-dione (47.5 mg, 0.3 mmol),  $^n\text{Bu}_4\text{NBF}_4$  (322.4 mg, 1.0 mmol), NaOAc (24.6 mg, 0.3 mmol, 1.0 equiv.) were dissolved in 5 mL of piperidine-1-carbaldehyde. The flask was equipped with platinum plates as the anode and cathode. The electrolysis was carried out at r.t. using a constant current of 10 mA for 2 hours. The reaction mixture was extracted with EtOAc (15 mL  $\times$  3). The collected organic layers were dried, evaporated and chromatographed through silica gel eluting with ethyl acetate/hexanes (2:1) to afford 15.2 mg red solid product **4o** in 21% yield.

m.p. 98-105 °C.  $^1\text{H}$  NMR (400 MHz,  $\text{CDCl}_3$ )  $\delta$  8.04 (d,  $J = 7.3$  Hz, 1H), 7.98 (d,  $J = 7.1$  Hz, 1H), 7.68 (dd,  $J_1 = 8.0$  Hz,  $J_2 = 6.9$  Hz, 1H), 7.62 (dd,  $J = 8.0, 7.0$  Hz, 1H), 6.02 (s, 1H), 3.50-3.48 (m, 4H), 1.74-1.72 (m, 6H).  $^{13}\text{C}$  NMR (100 MHz,  $\text{CDCl}_3$ )  $\delta$  183.5, 183.4, 154.1, 133.7, 133.0, 132.6, 132.2, 126.6, 125.4, 110.4, 50.4, 25.7, 24.3. The  $^1\text{H}$  and  $^{13}\text{C}$  NMR data match the reported values<sup>[13]</sup>.

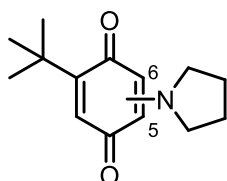

The starting material, 2-(tert-butyl)cyclohexa-2,5-diene-1,4-dione (49.3 mg, 0.3 mmol),  $^n\text{Bu}_4\text{NBF}_4$  (322.4 mg, 1.0 mmol), NaOAc (24.6 mg, 0.3 mmol, 1.0 equiv.) were

dissolved in 5 mL of pyrrolidine-1-carbaldehyde. The flask was equipped with platinum plates as the anode and cathode. The electrolysis was carried out at r.t. using a constant current of 10 mA for 2 hours. The reaction mixture was extracted with EtOAc (15 mL  $\times$  3). The collected organic layers were dried, evaporated and chromatographed through silica gel eluting with ethyl acetate/hexanes (2:1) to afford 50.4 mg red liquid product **4p** in 72% yield (C6/C5 = 3:1).

The starting material, 2-(tert-butyl)benzene-1,4-diol (49.9 mg, 0.3 mmol),  $t\text{Bu}_4\text{NBF}_4$  (322.4 mg, 1.0 mmol), NaOAc (24.6 mg, 0.3 mmol, 1.0 equiv.) were dissolved in 5 mL of DMF. The flask was equipped with platinum plates as the anode and cathode. The electrolysis was carried out at r.t. using a constant current of 10 mA for 2 hours. The reaction mixture was extracted with EtOAc (15 mL  $\times$  3). The collected organic layers were dried, evaporated and chromatographed through silica gel eluting with ethyl acetate/hexanes (2:1) to afford 39.9 mg red liquid product **4p** in 57% yield (C6/C5 = 3:1).

**2-(tert-butyl)-6-(pyrrolidin-1-yl)cyclohexa-2,5-diene-1,4-dione (4p, 6-NMe<sub>2</sub>)**

<sup>1</sup>H NMR (400 MHz, CDCl<sub>3</sub>)  $\delta$  6.47 (d,  $J$  = 1.6 Hz, 1H), 5.42 (d,  $J$  = 1.8 Hz, 1H), 3.67-3.39 (m, 4H), 1.98-1.94 (m, 4H), 1.27 (s, 9H). <sup>13</sup>C NMR (100 MHz, CDCl<sub>3</sub>)  $\delta$ . 185.4, 151.8, 149.3, 133.7, 100.9, 50.8, 34.9, 29.4, 29.22. HRMS (ESI)  $m/z$ : [M+H]<sup>+</sup> Calcd. for C<sub>14</sub>H<sub>19</sub>NO<sub>2</sub> 234.1489; Found 234.1486.

**2-(tert-butyl)-5-(pyrrolidin-1-yl)cyclohexa-2,5-diene-1,4-dione (4p, 5-NMe<sub>2</sub>)**

<sup>1</sup>H NMR (400 MHz, CDCl<sub>3</sub>)  $\delta$  6.33 (s, 1H), 5.40 (s, 1H), 3.48-3.43 (m, 4H), 1.96-1.93 (m, 4H), 1.30 (s, 9H). <sup>13</sup>C NMR (100 MHz, CDCl<sub>3</sub>)  $\delta$  186.3, 185.1, 157.8, 146.3, 128.5, 104.3, 50.3, 35.3, 29.6, 29.1. HRMS (ESI)  $m/z$ : [M+H]<sup>+</sup> Calcd. for C<sub>14</sub>H<sub>19</sub>NO<sub>2</sub> 234.1489; Found 234.1490.

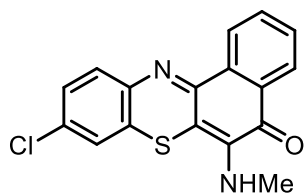

**9-chloro-6-(methylamino)-5H-benzo[a]phenothiazin-5-one(8)**

The starting material, 2-bromo-3-(dimethylamino)naphthalene-1,4-dione (84.0 mg, 0.3 mmol), 2-amino-5-chlorobenzenethiol (47.9 mg, 0.3 mmol), Na<sub>2</sub>CO<sub>3</sub> (24.6 mg, 0.3 mmol, 1.0 equiv.) were dissolved in 5 mL of MeOH. The reaction was carried out at 65 °C. for 24 hours. The organic layers were evaporated and chromatographed through

silica gel eluting with ethyl acetate/hexanes (10:1) to afford 65.7 mg red solid product **8** in 67% yield.

m.p. 185-189°C. <sup>1</sup>H NMR (400MHz, CDCl<sub>3</sub>) δ 8.80-8.78 (m, 1H), 8.30-8.27 (m, 1H), 7.78-7.70 (m, 3H), 7.40 (d, *J* = 8.4 Hz, 1H), 7.36 (dd, *J*<sub>1</sub> = 8.8 Hz, *J*<sub>2</sub> = 2.0 Hz, 1H), 4.20 (s, 3H). <sup>13</sup>C NMR (100MHz, CDCl<sub>3</sub>) δ 175.4, 145.6, 145.5, 137.5, 135.2, 133.9, 133.5, 132.3, 131.6, 131.4, 128.0, 125.9, 125.4, 125.0, 124.9, 123.0, 60.2. HRMS (ESI) *m/z*: [M+H]<sup>+</sup> Calcd. for C<sub>17</sub>H<sub>11</sub>ClN<sub>2</sub>OS 327.0354, 329.0324; Found 327.0355, 329.0326.

## 6. NMR spectra for products

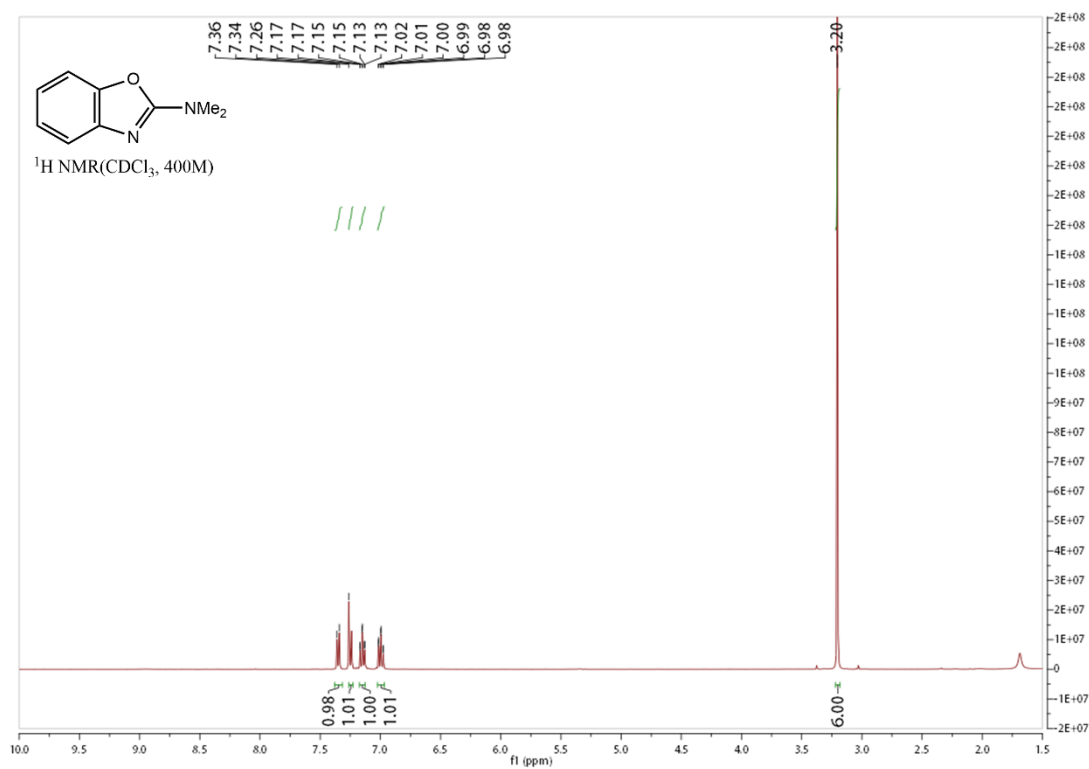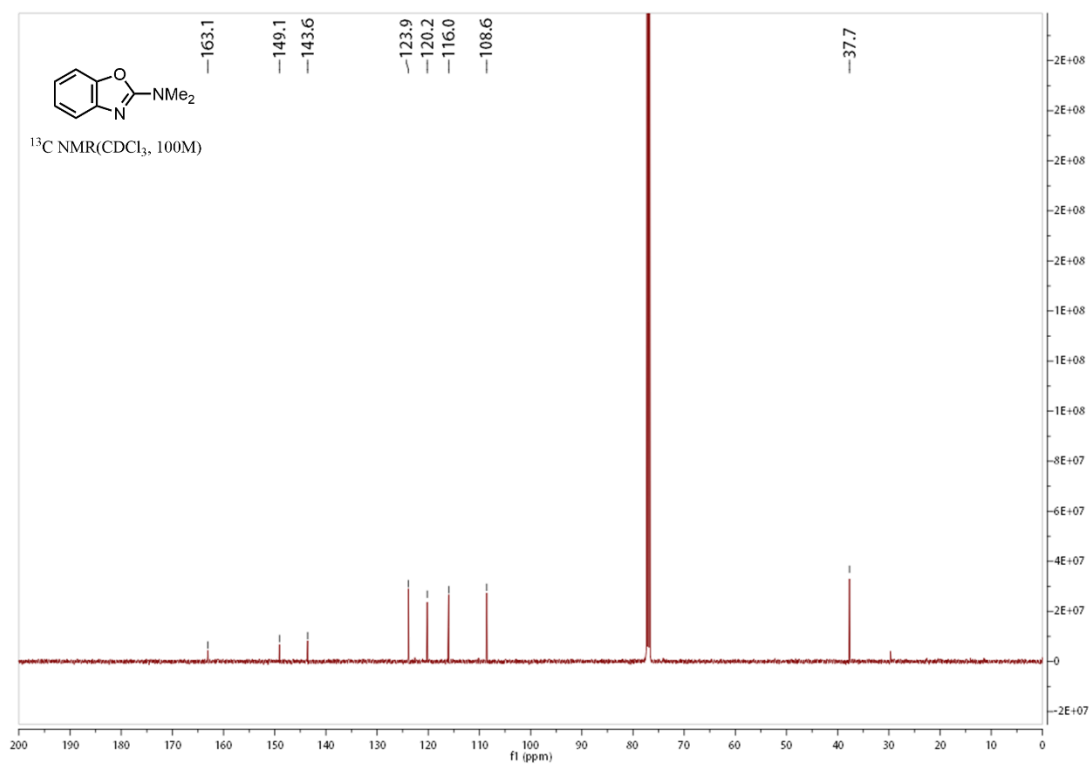

<sup>1</sup>H NMR of **2a** (400 MHz, CDCl<sub>3</sub>) and <sup>13</sup>C NMR of **2a** (100 MHz, CDCl<sub>3</sub>)

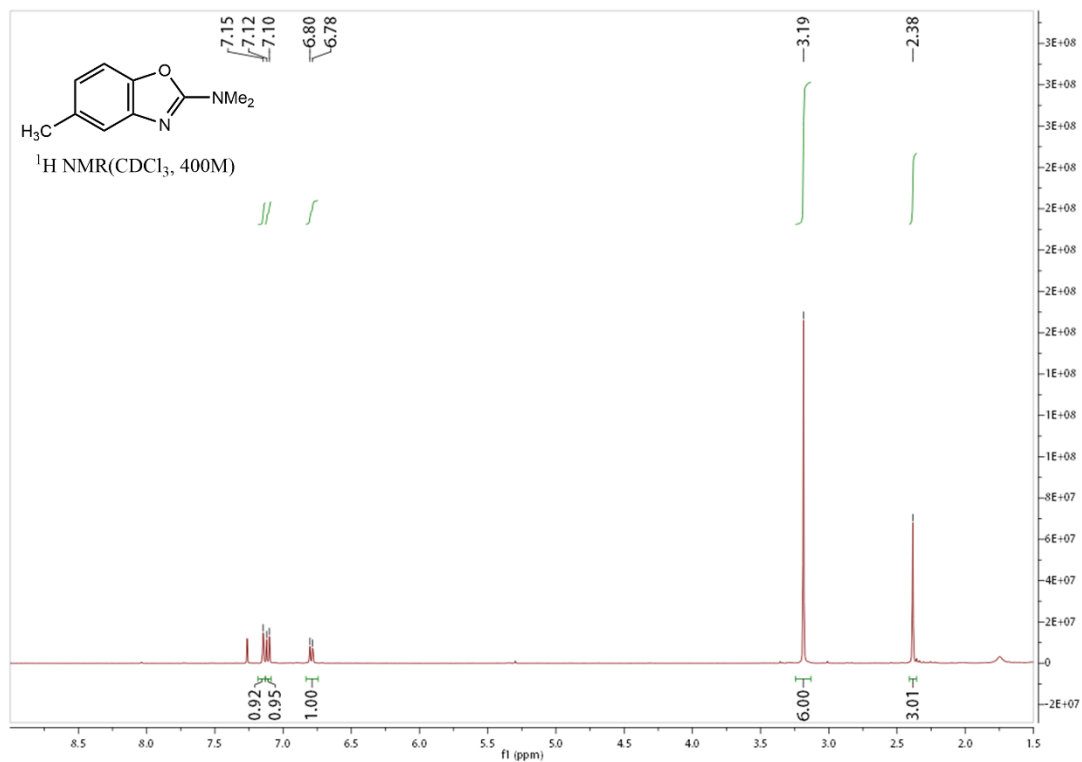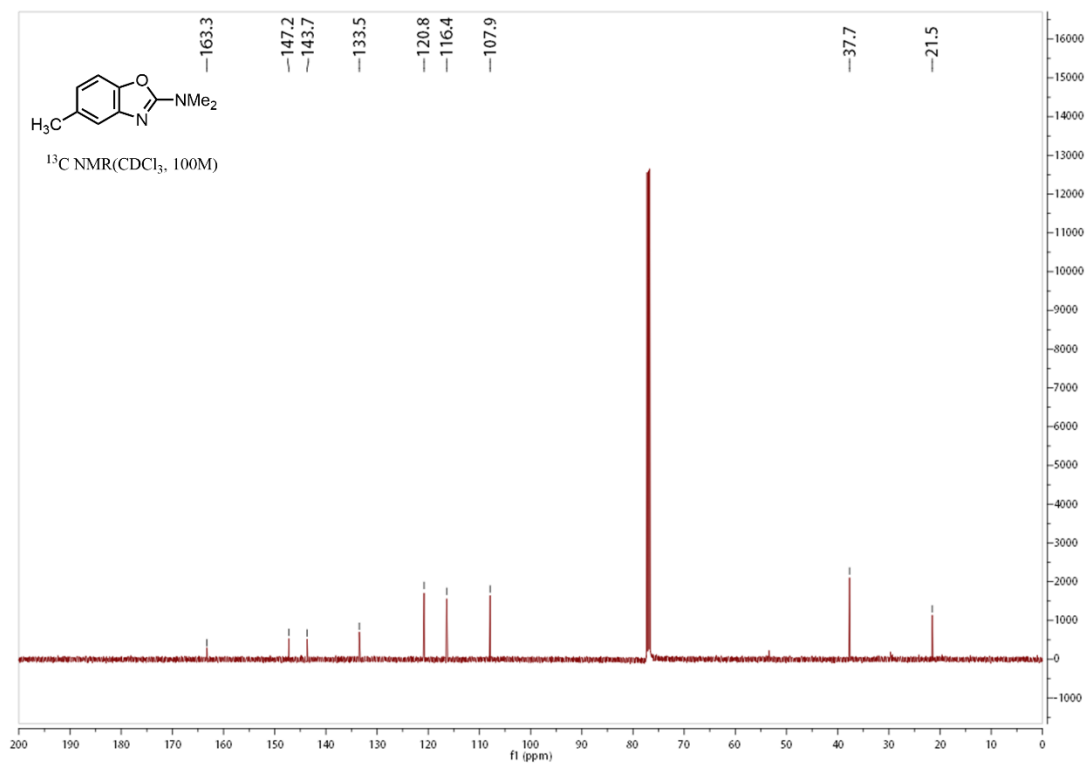

<sup>1</sup>H NMR of **2b** (400 MHz, CDCl<sub>3</sub>) and <sup>13</sup>C NMR of **2b** (100 MHz, CDCl<sub>3</sub>)



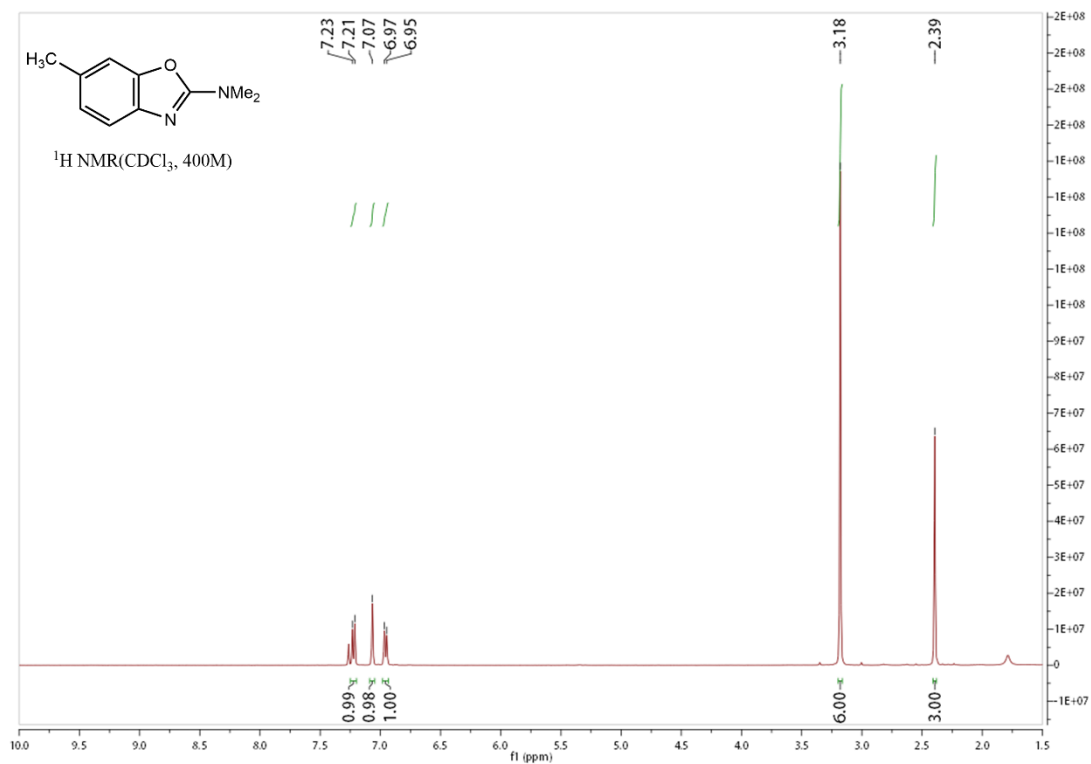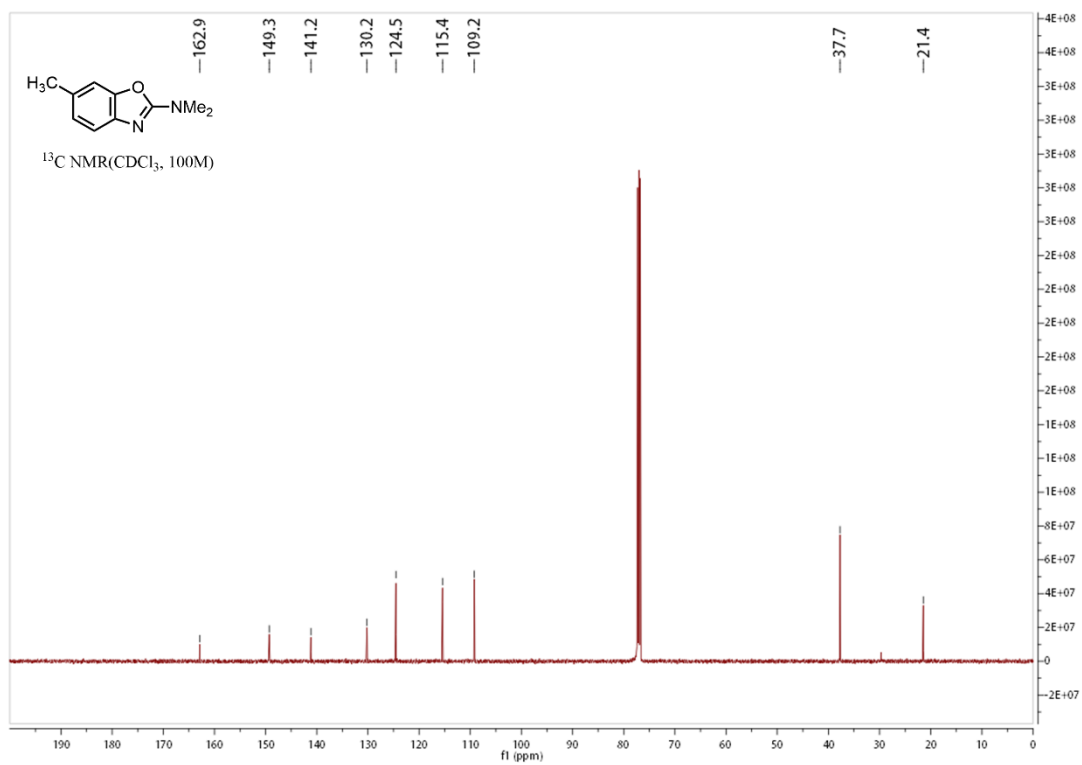

<sup>1</sup>H NMR of **2c** (400 MHz, CDCl<sub>3</sub>) and <sup>13</sup>C NMR of **2c** (100 MHz, CDCl<sub>3</sub>)

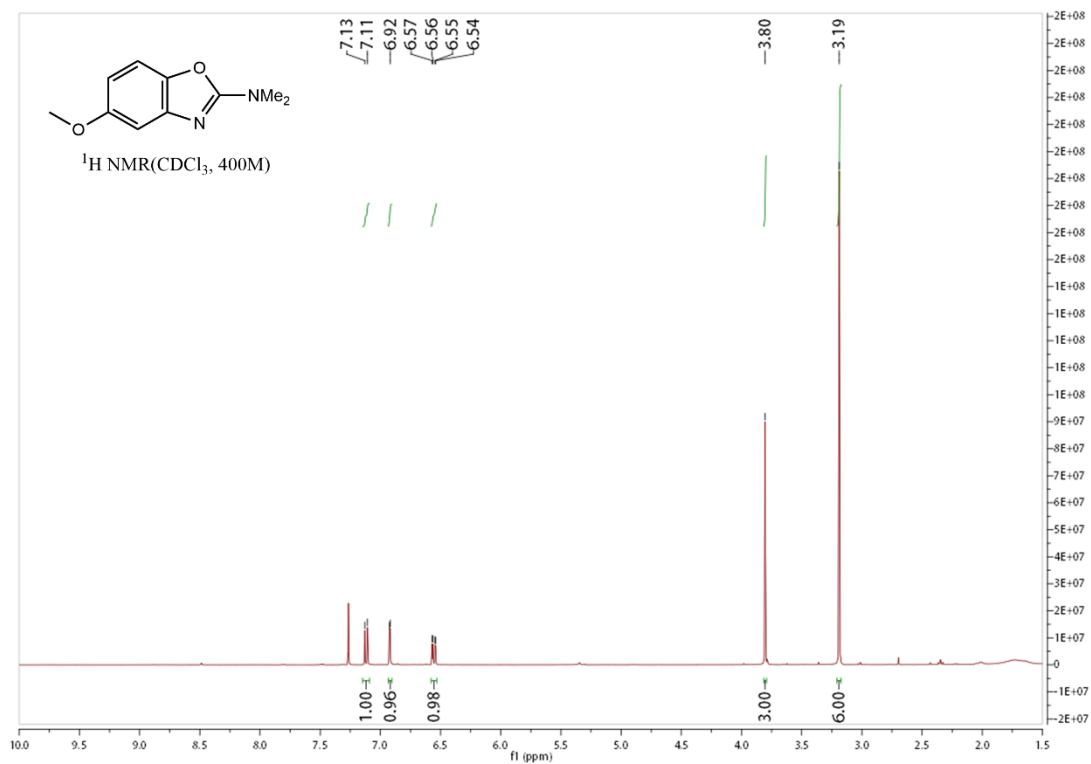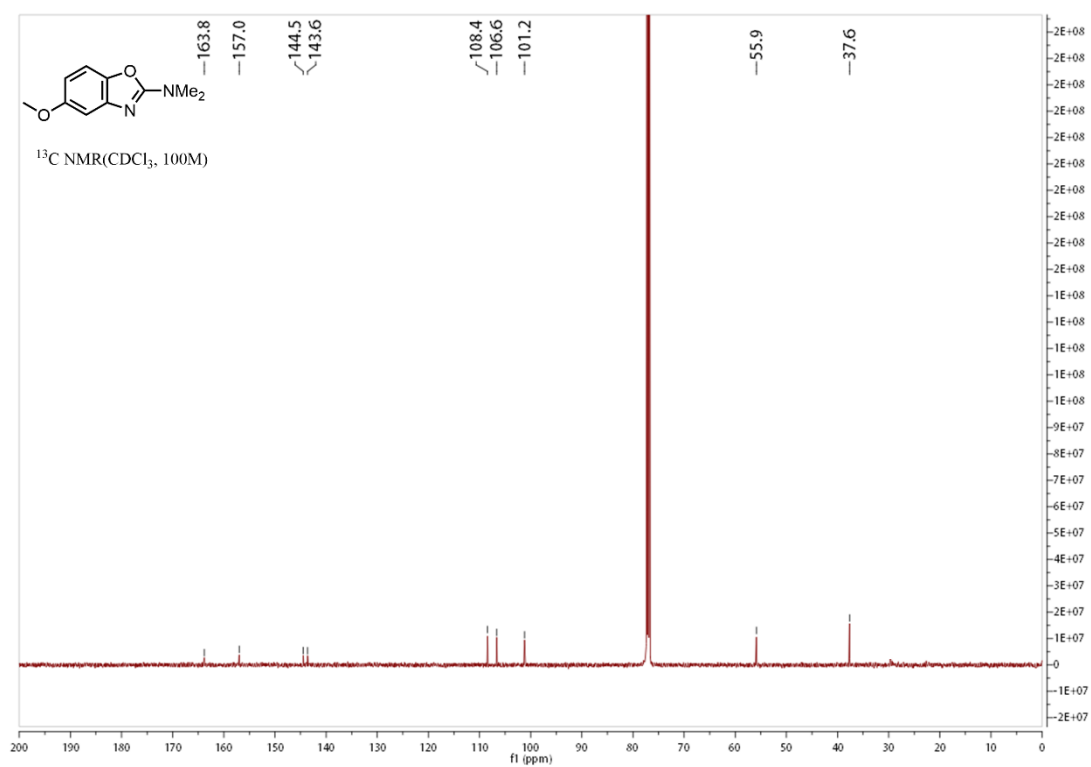

<sup>1</sup>H NMR of **2d** (400 MHz, CDCl<sub>3</sub>) and <sup>13</sup>C NMR of **2d** (100 MHz, CDCl<sub>3</sub>)

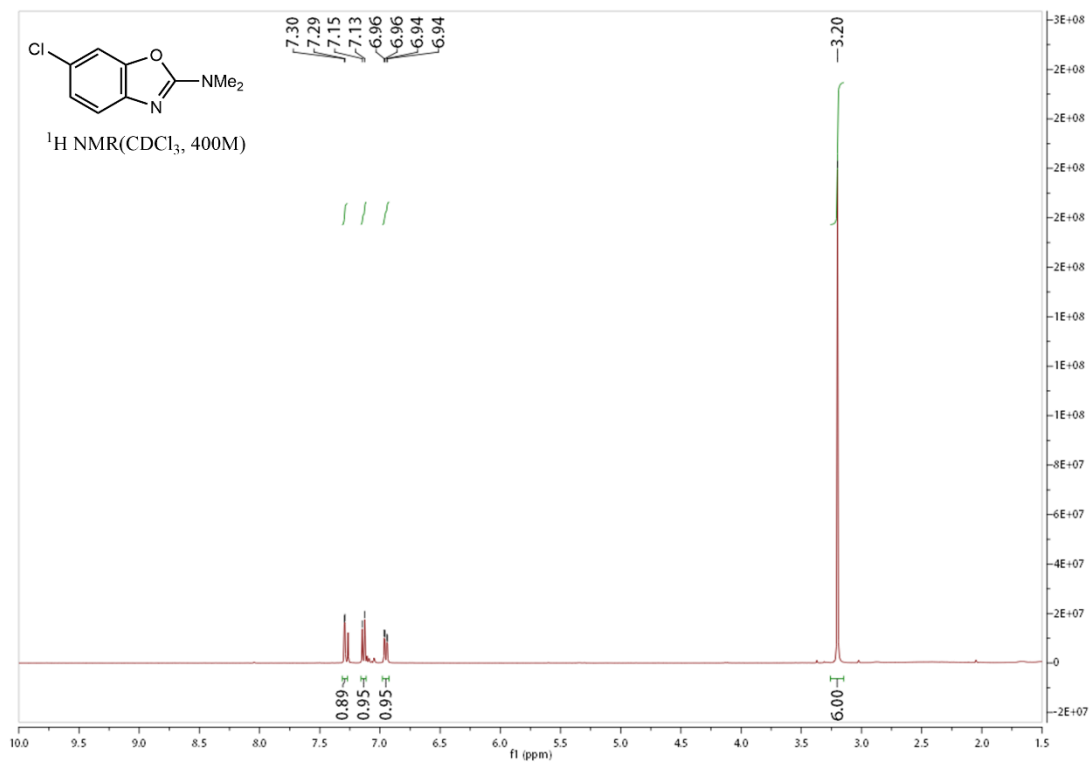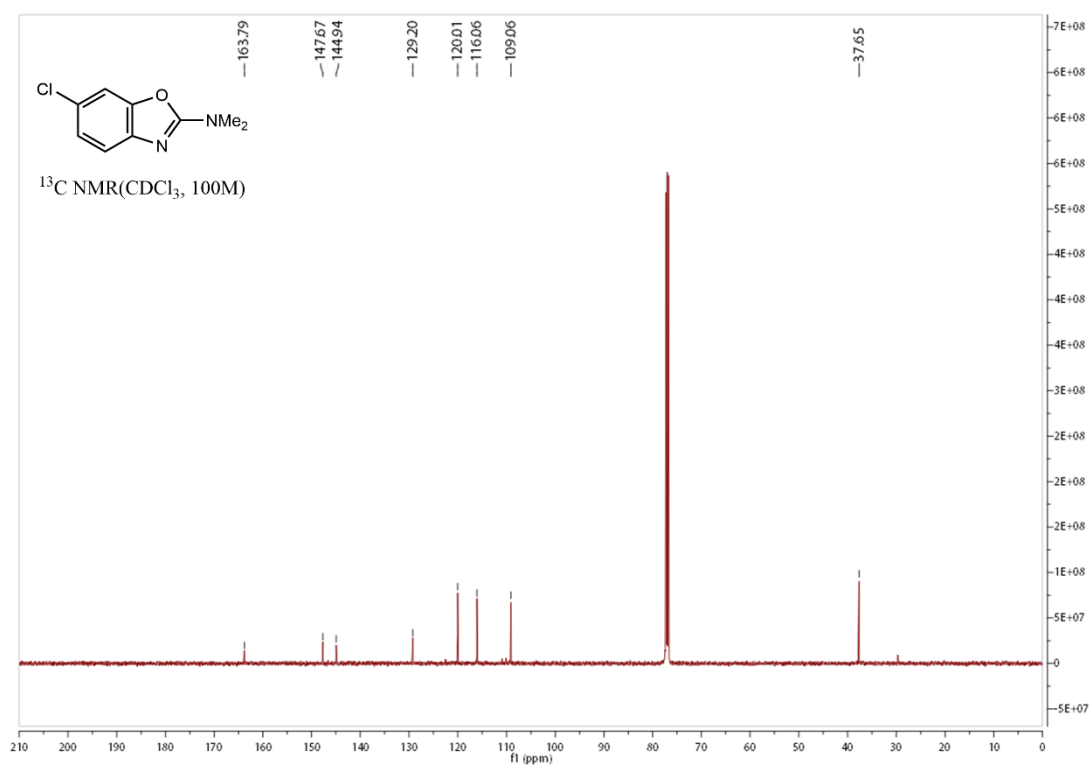

<sup>1</sup>H NMR of **2e** (400 MHz, CDCl<sub>3</sub>) and <sup>13</sup>C NMR of **2e** (100 MHz, CDCl<sub>3</sub>)

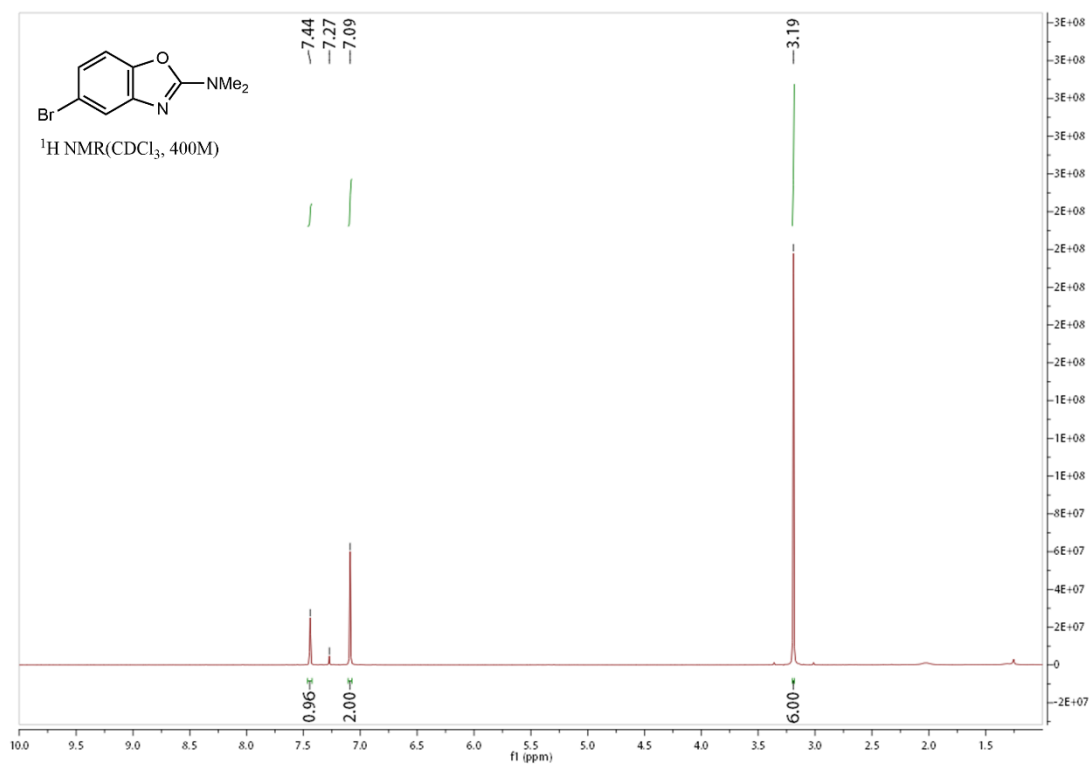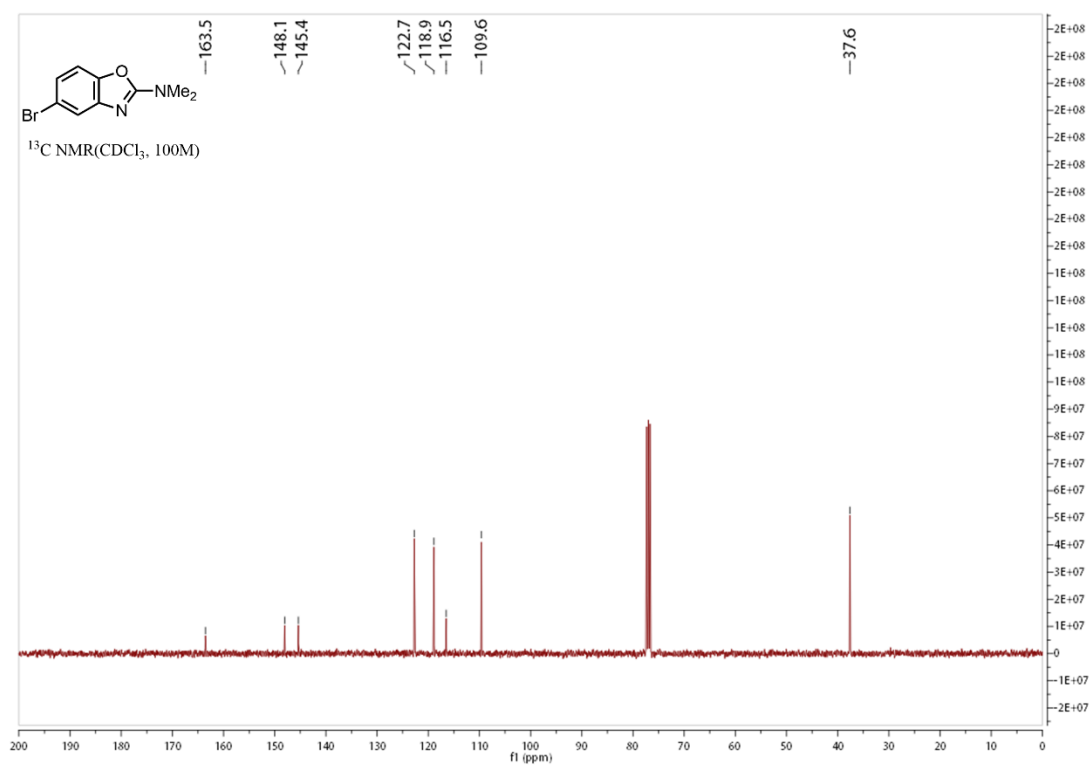

<sup>1</sup>H NMR of **2f** (400 MHz, CDCl<sub>3</sub>) and <sup>13</sup>C NMR of **2f** (100 MHz, CDCl<sub>3</sub>)

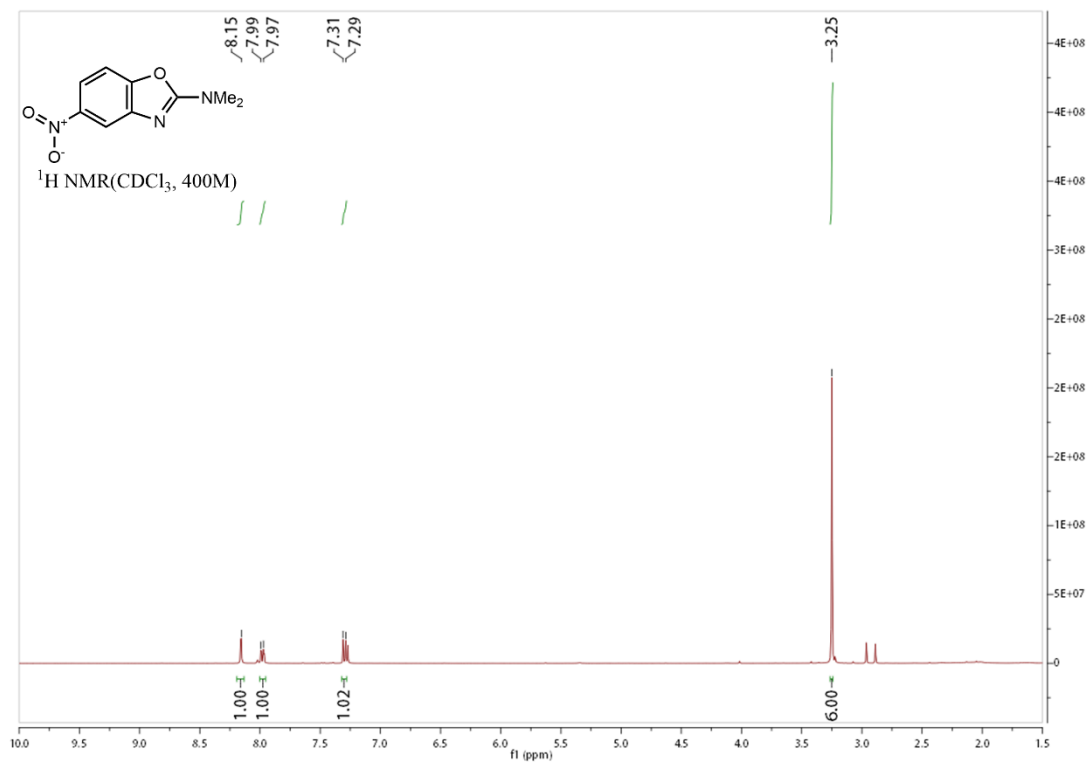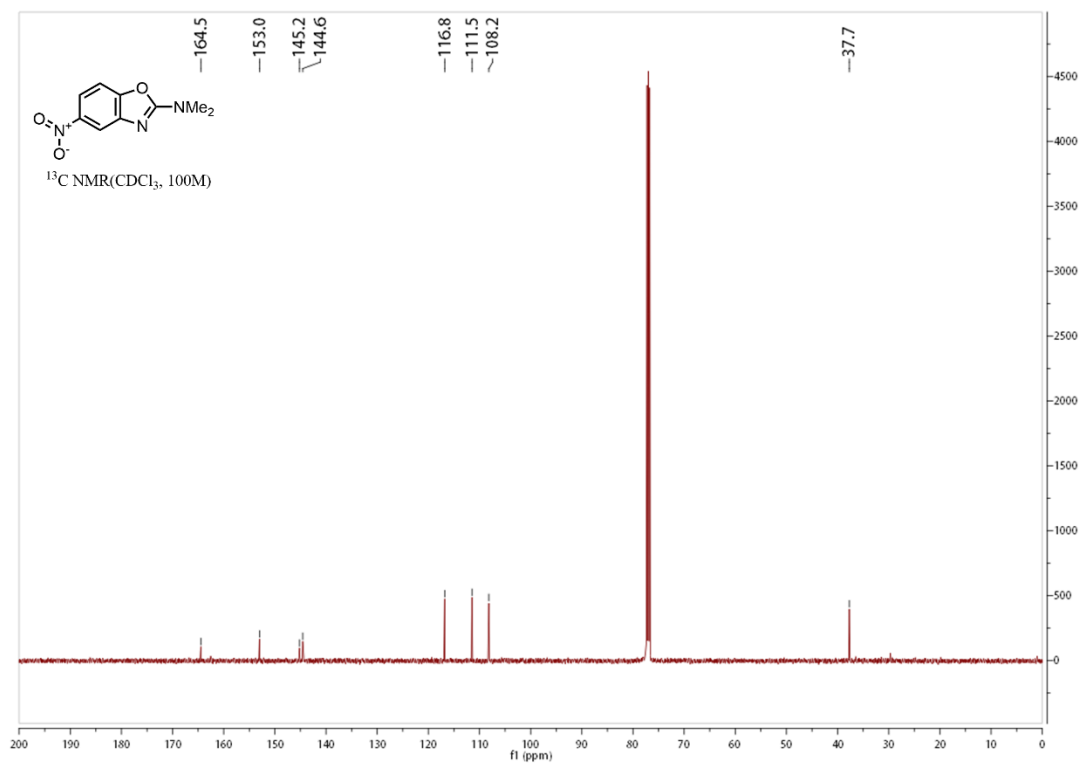

$^1\text{H NMR}$  of **2g** (400 MHz,  $\text{CDCl}_3$ ) and  $^{13}\text{C NMR}$  of **2g** (100 MHz,  $\text{CDCl}_3$ )

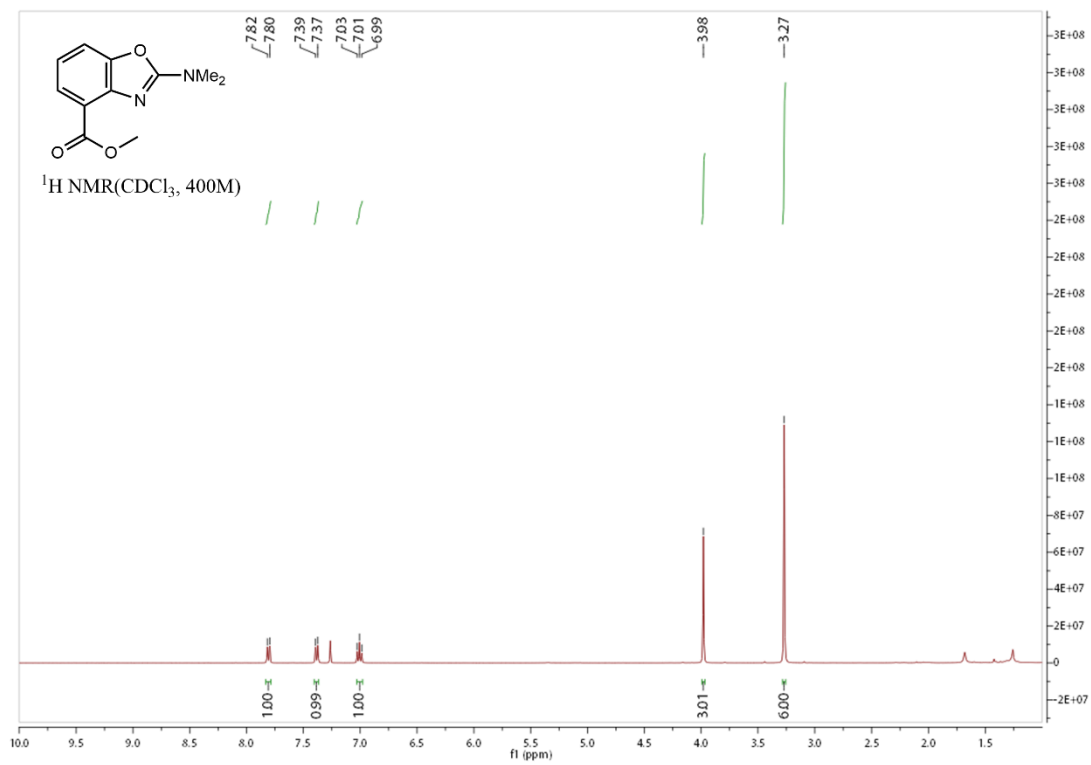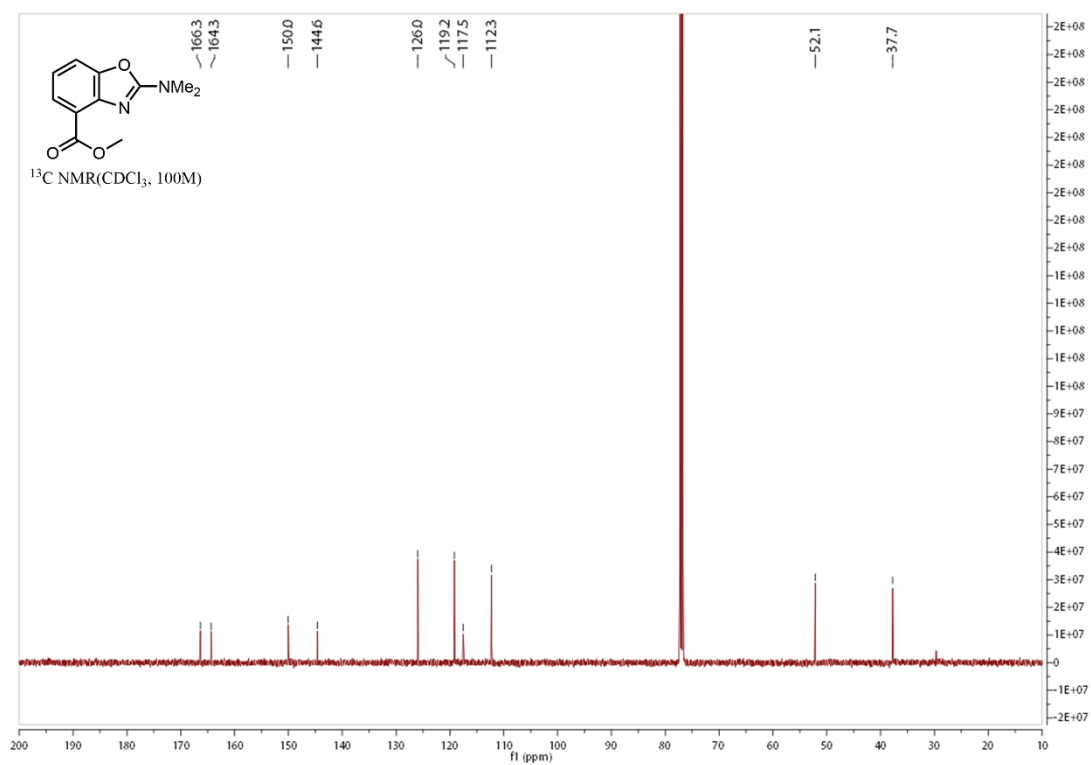

<sup>1</sup>H NMR of **2h** (400 MHz, CDCl<sub>3</sub>) and <sup>13</sup>C NMR of **2h** (100 MHz, CDCl<sub>3</sub>)

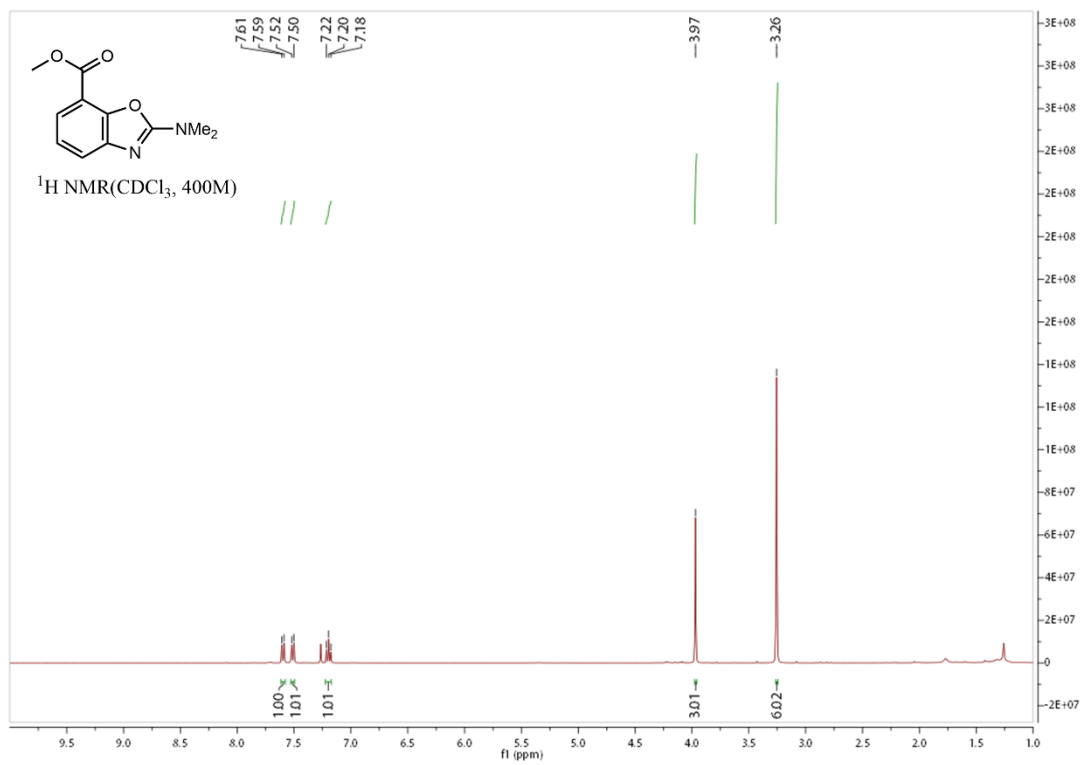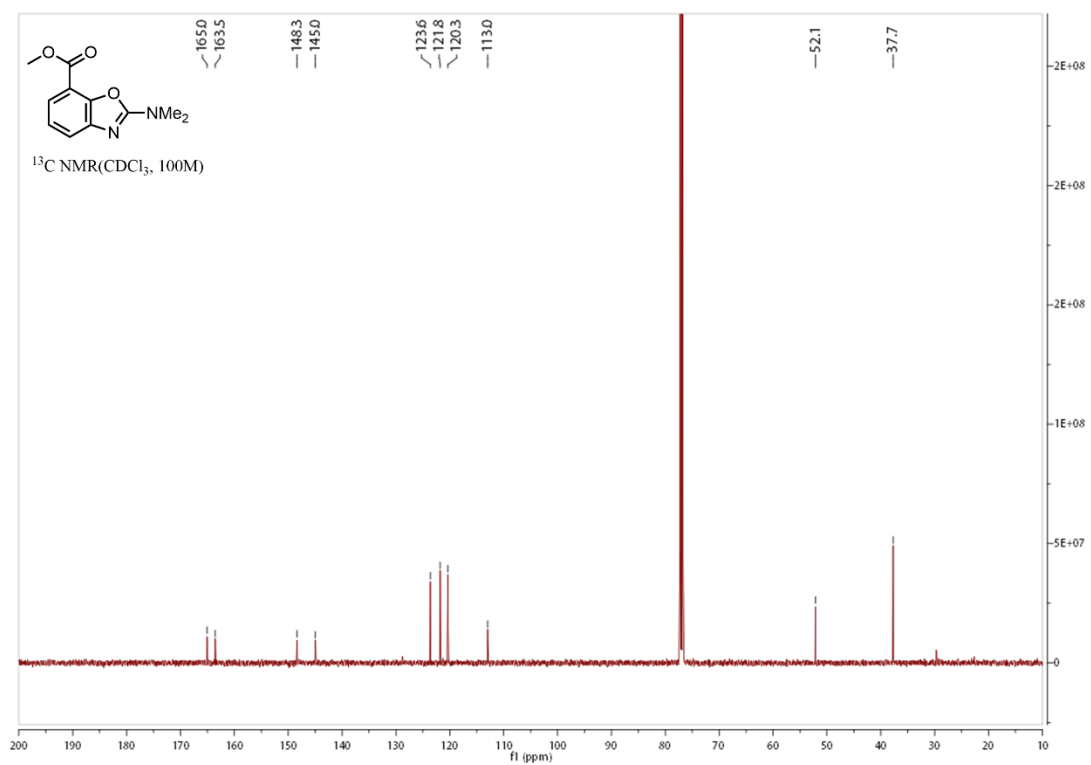

<sup>1</sup>H NMR of **2i** (400 MHz, CDCl<sub>3</sub>) and <sup>13</sup>C NMR of **2i** (100 MHz, CDCl<sub>3</sub>)

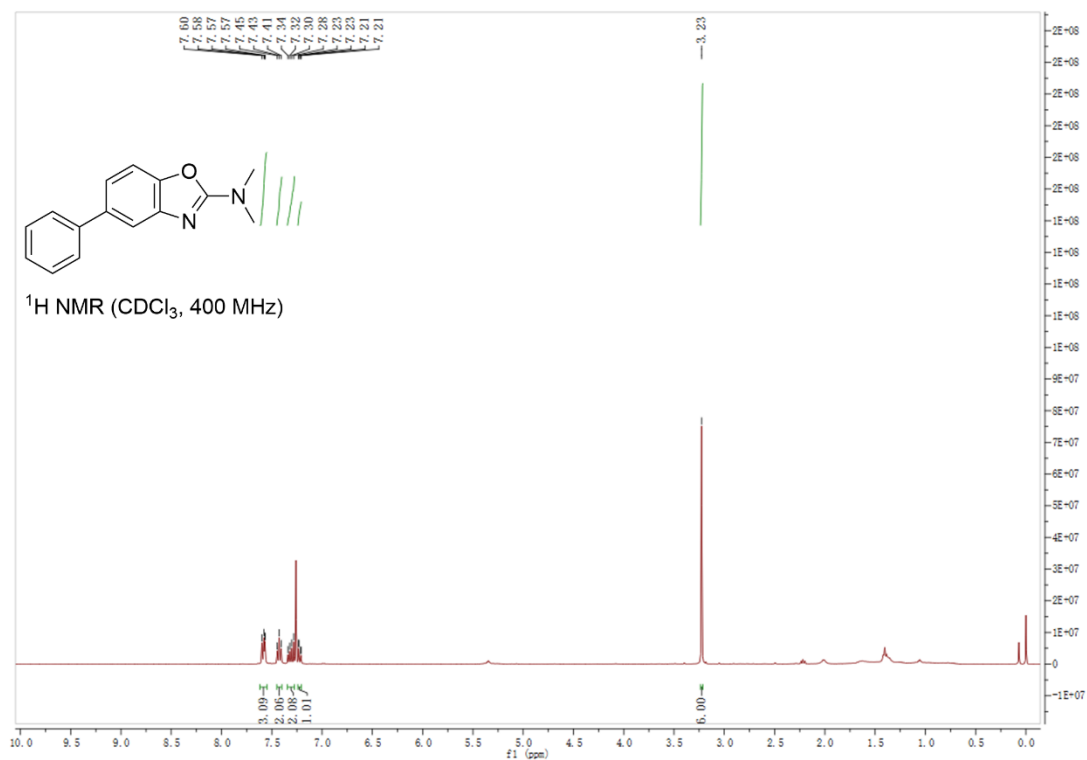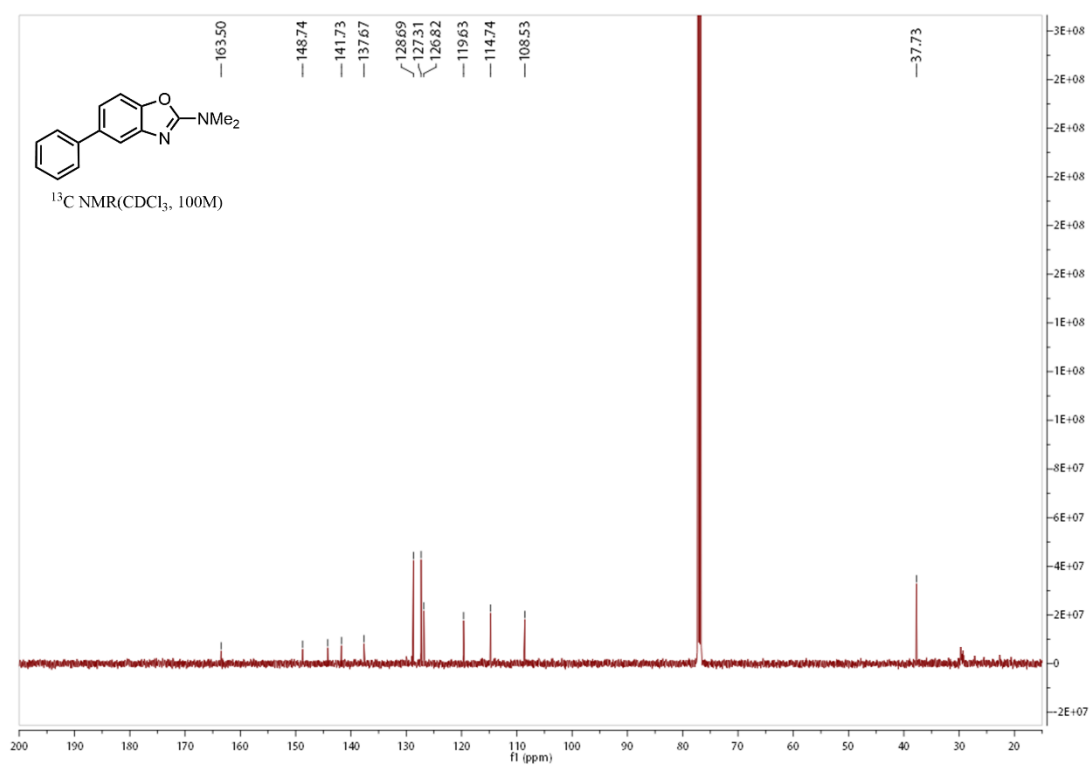

<sup>1</sup>H NMR of **2j** (400 MHz, CDCl<sub>3</sub>) and <sup>13</sup>C NMR of **2j** (100 MHz, CDCl<sub>3</sub>)



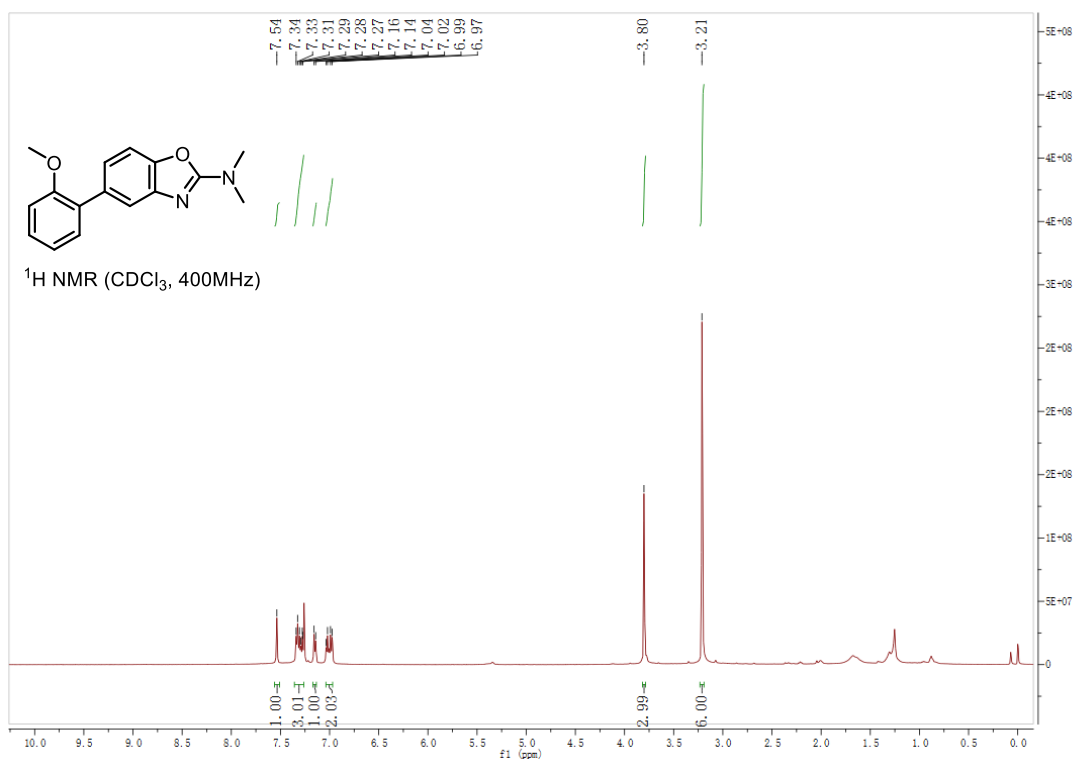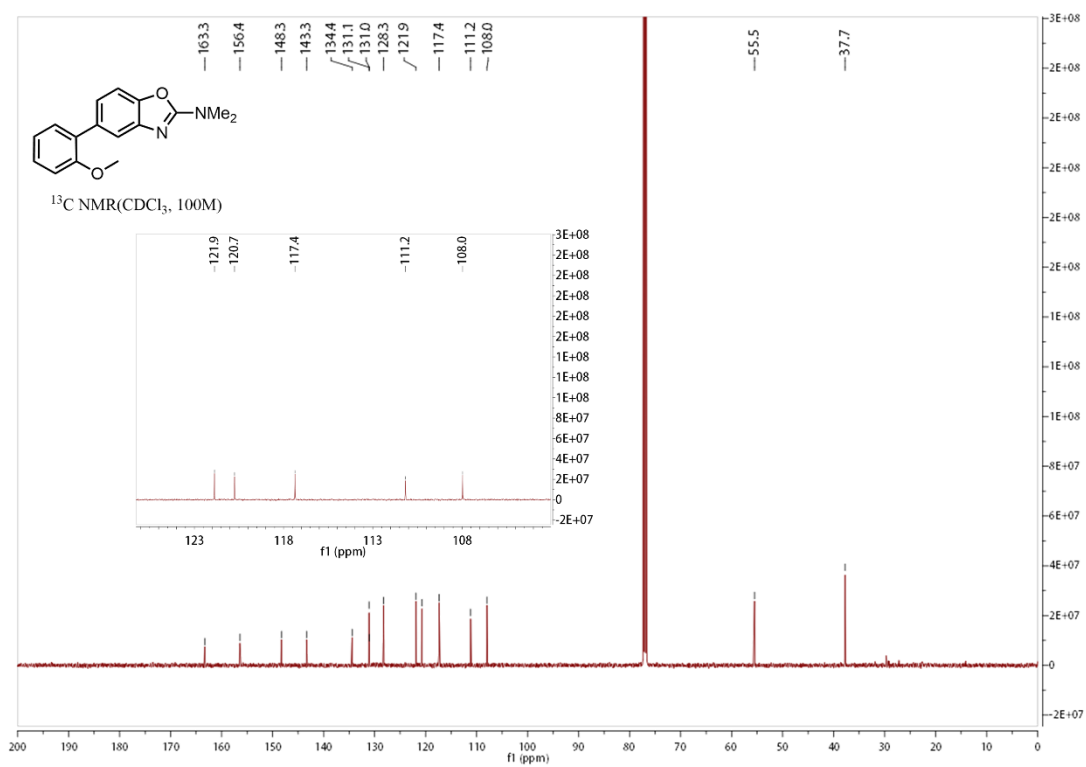

<sup>1</sup>H NMR of **2k** (400 MHz, CDCl<sub>3</sub>) and <sup>13</sup>C NMR of **2k** (100 MHz, CDCl<sub>3</sub>)

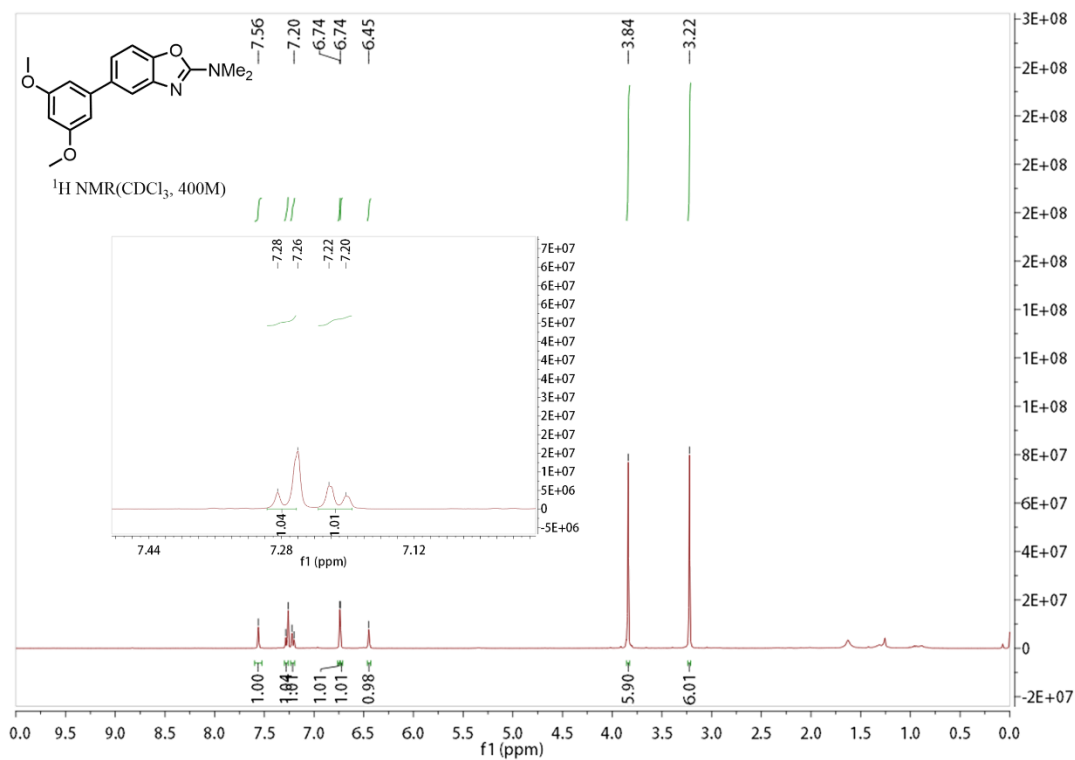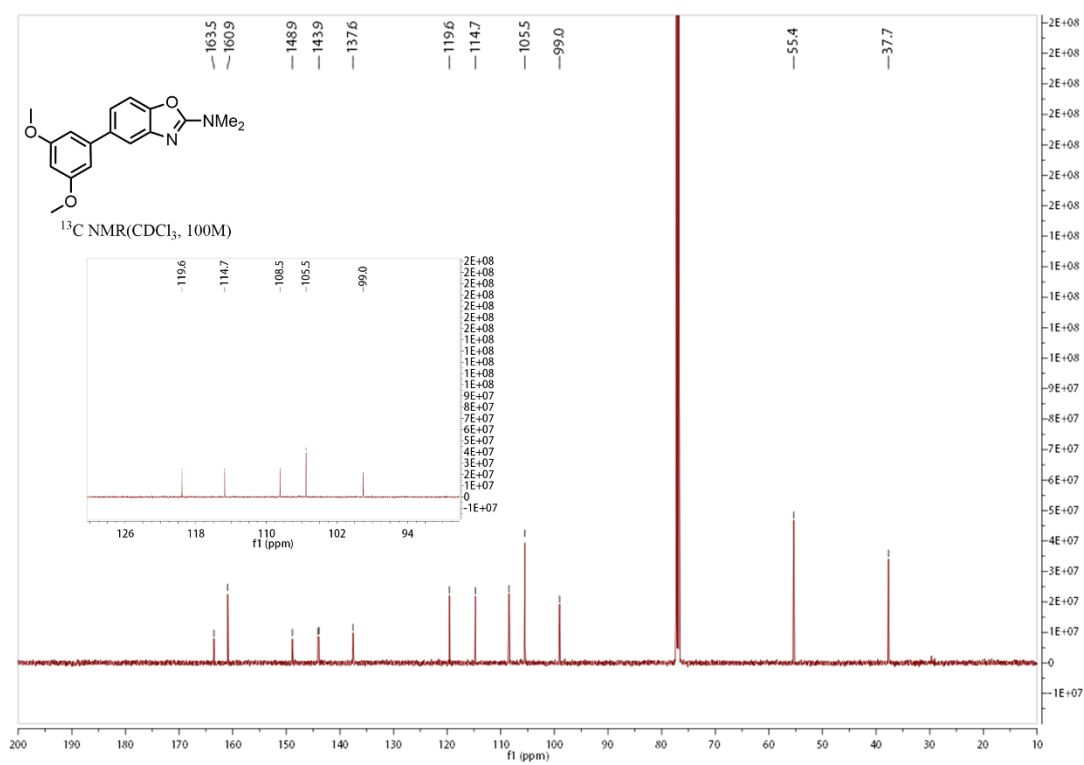

<sup>1</sup>H NMR of **21** (400 MHz, CDCl<sub>3</sub>) and <sup>13</sup>C NMR of **21** (100 MHz, CDCl<sub>3</sub>)

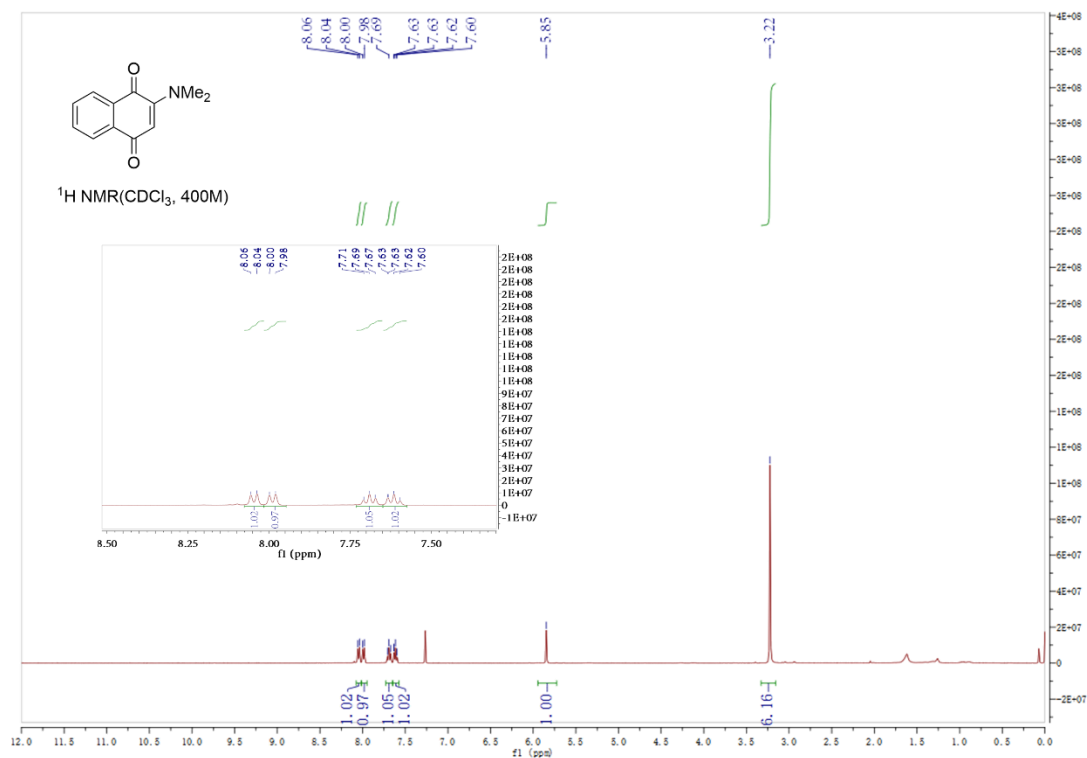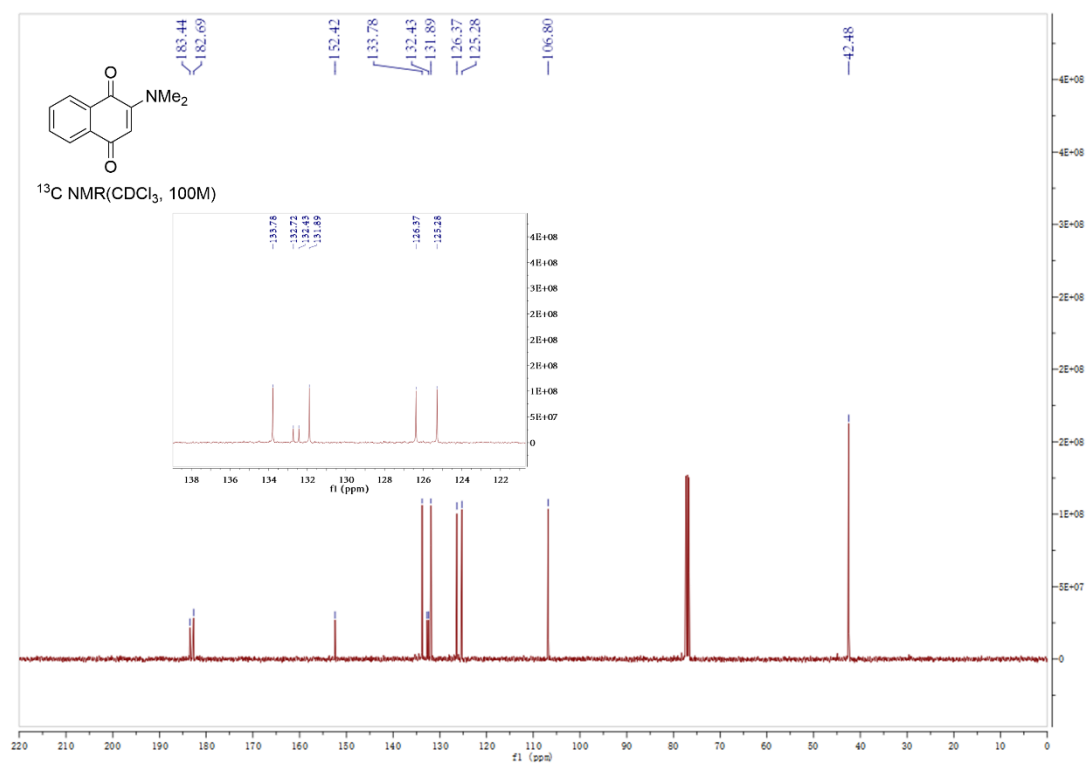

<sup>1</sup>H NMR of **4a** (400 MHz, CDCl<sub>3</sub>) and <sup>13</sup>C NMR of **4a** (100 MHz, CDCl<sub>3</sub>)

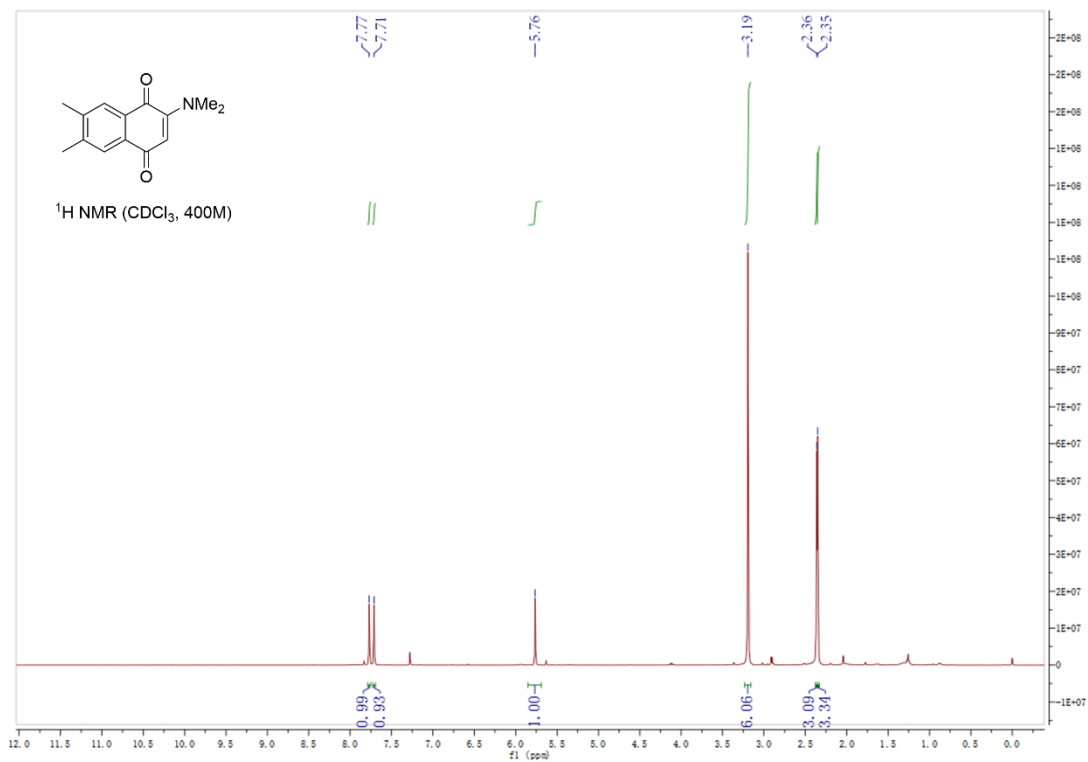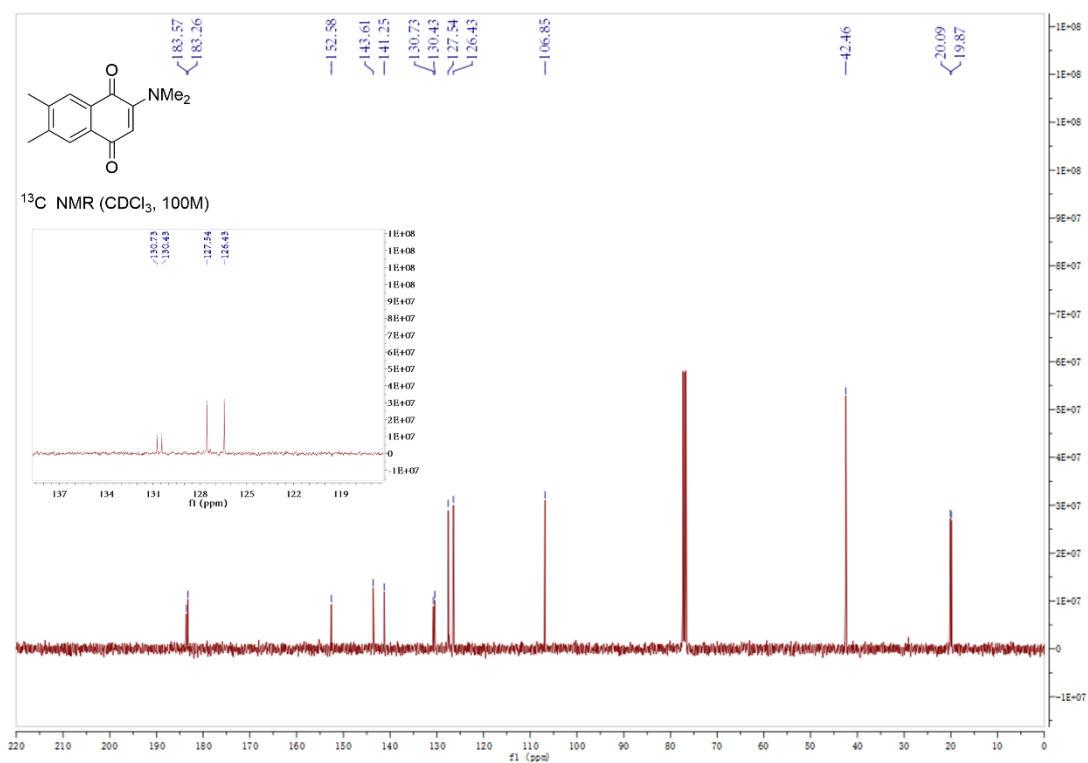

<sup>1</sup>H NMR of **4b** (400 MHz, CDCl<sub>3</sub>) and <sup>13</sup>C NMR of **4b** (100 MHz, CDCl<sub>3</sub>)

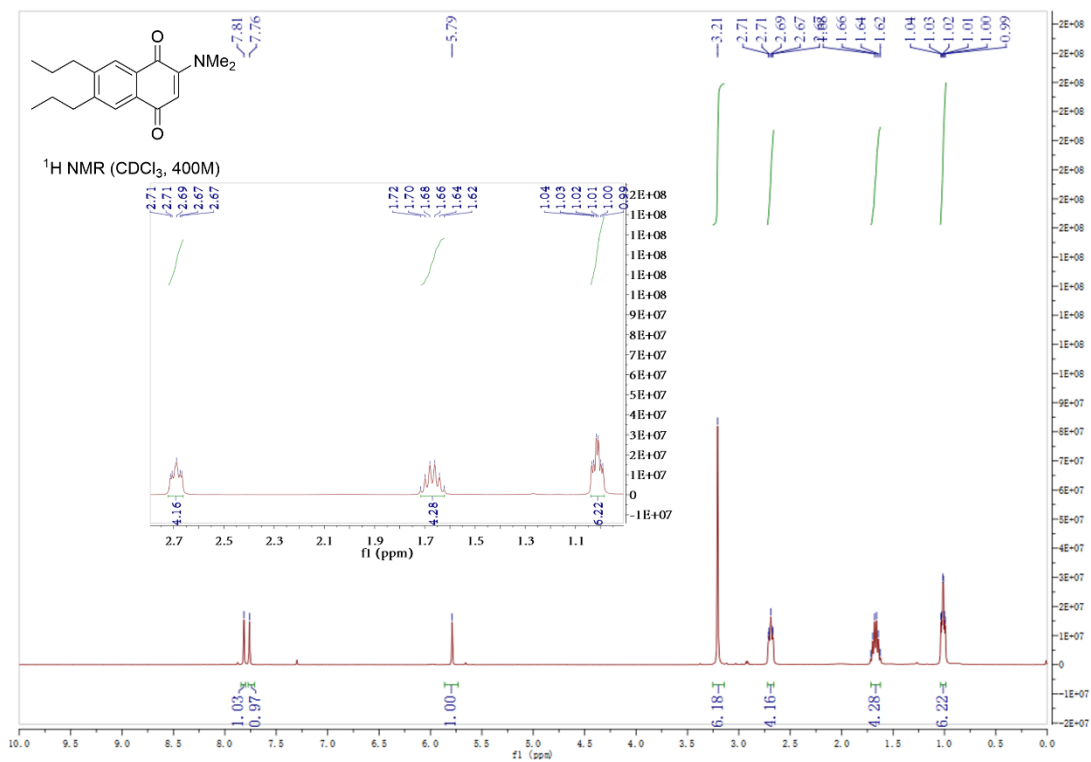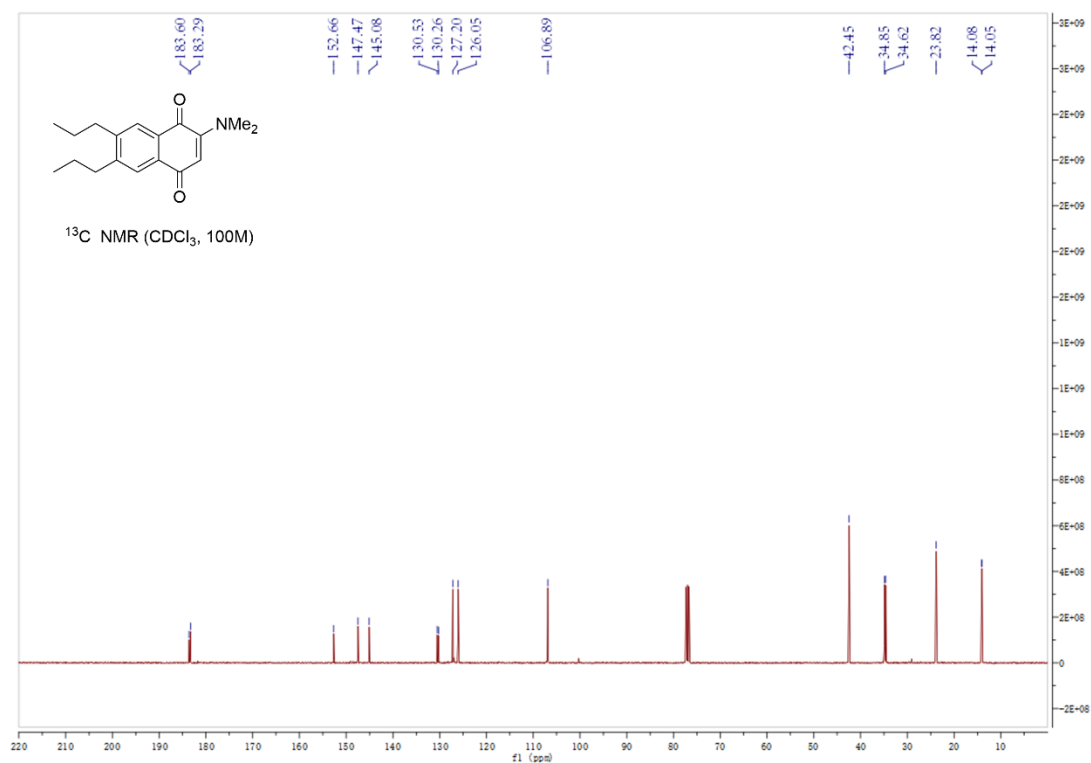

<sup>1</sup>H NMR of **4c** (400 MHz, CDCl<sub>3</sub>) and <sup>13</sup>C NMR of **4c** (100 MHz, CDCl<sub>3</sub>)

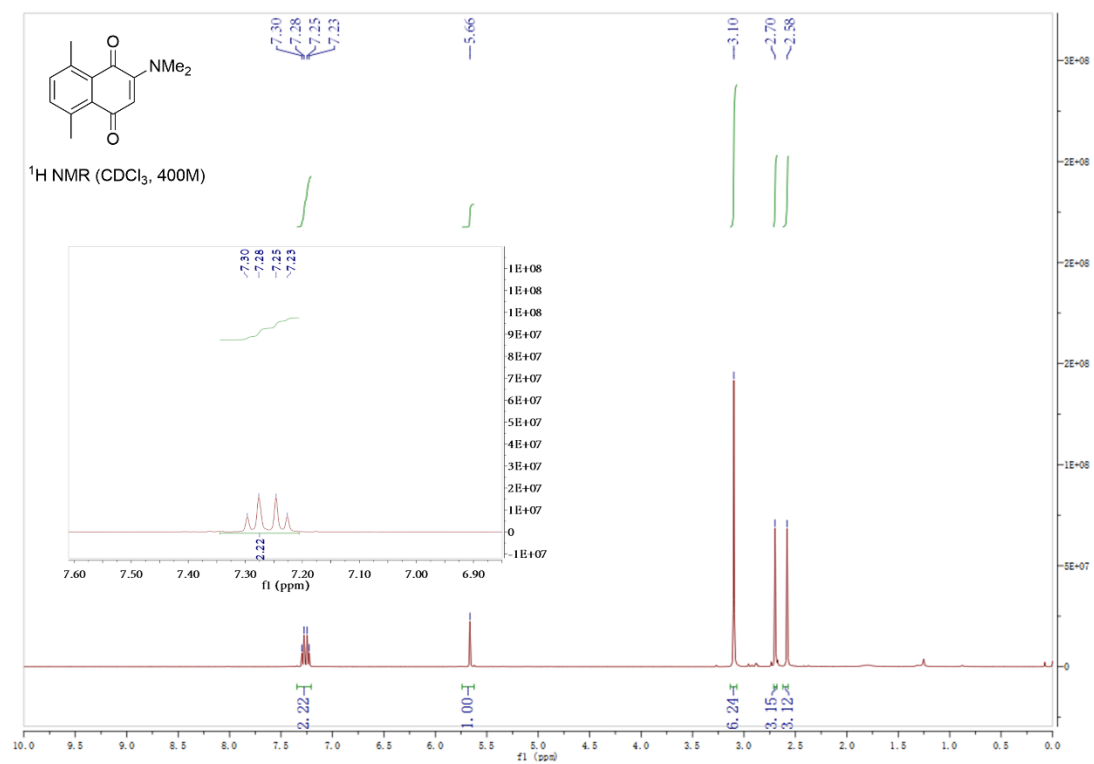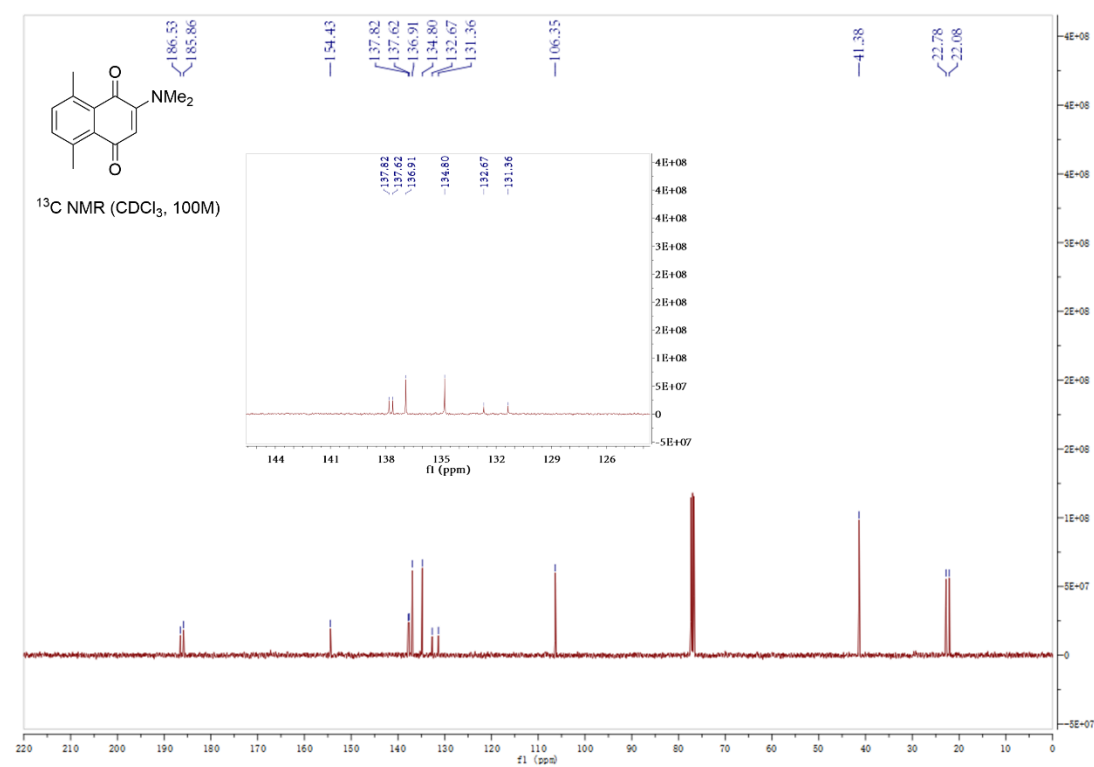

<sup>1</sup>H NMR of **4d** (400 MHz, CDCl<sub>3</sub>) and <sup>13</sup>C NMR of **4d** (100 MHz, CDCl<sub>3</sub>)

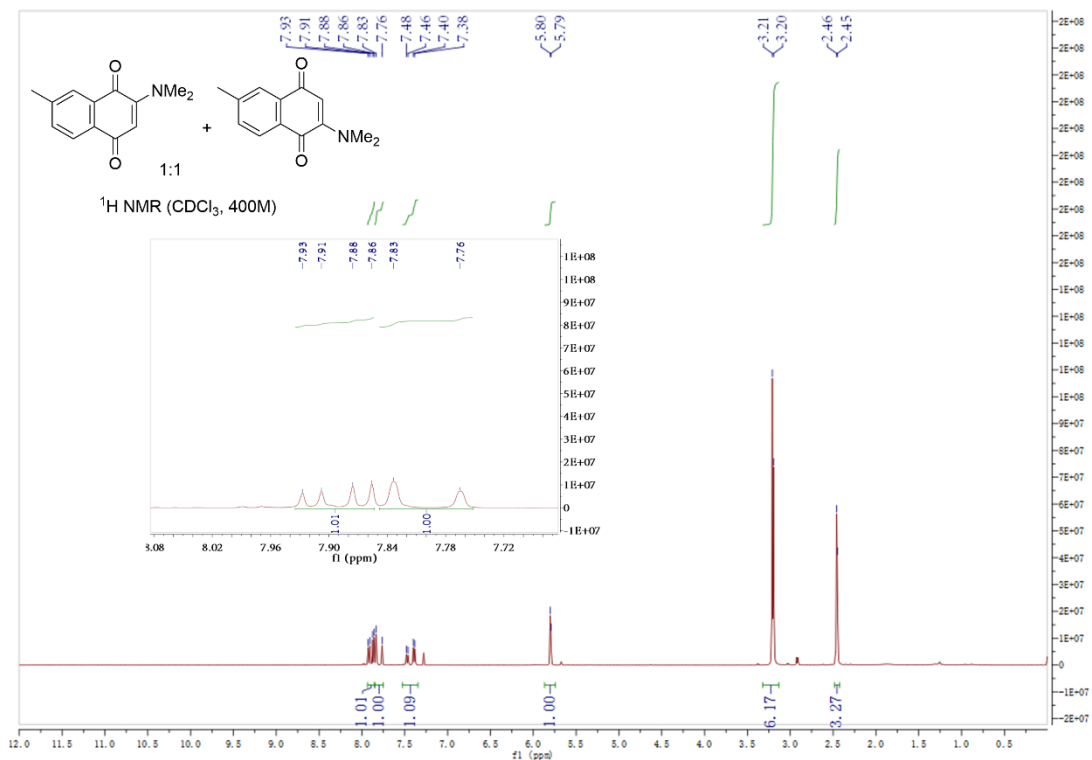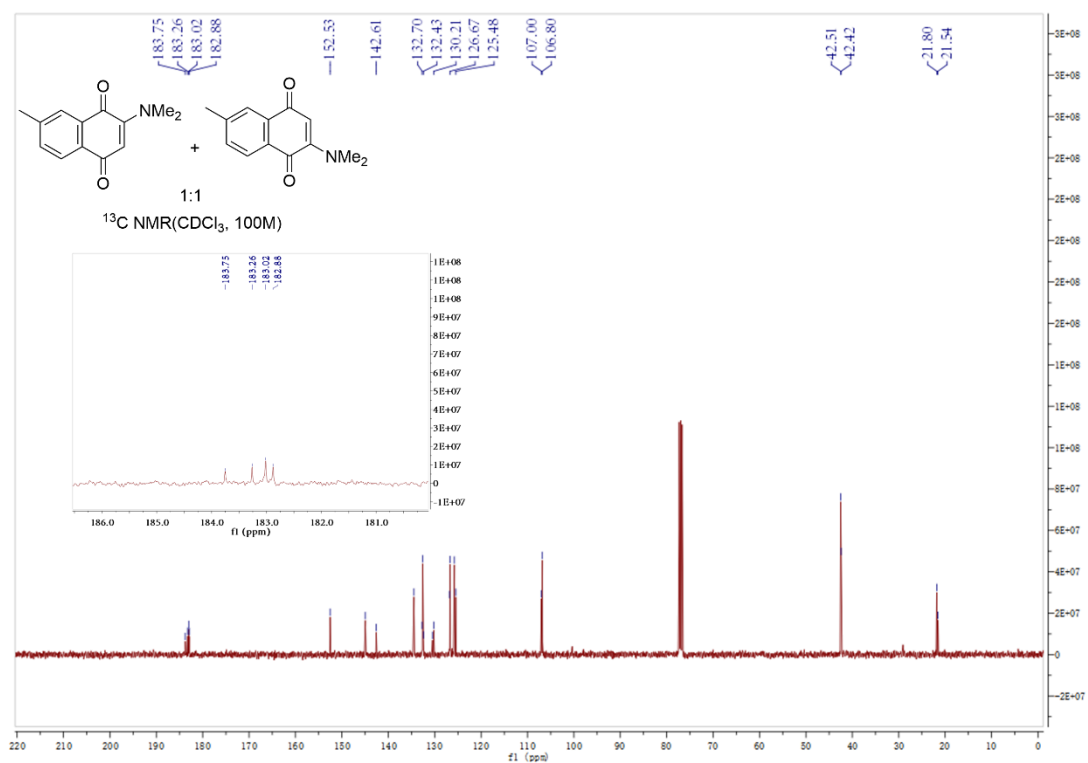

<sup>1</sup>H NMR of **4e** (400 MHz, CDCl<sub>3</sub>) and <sup>13</sup>C NMR of **4e** (100 MHz, CDCl<sub>3</sub>)

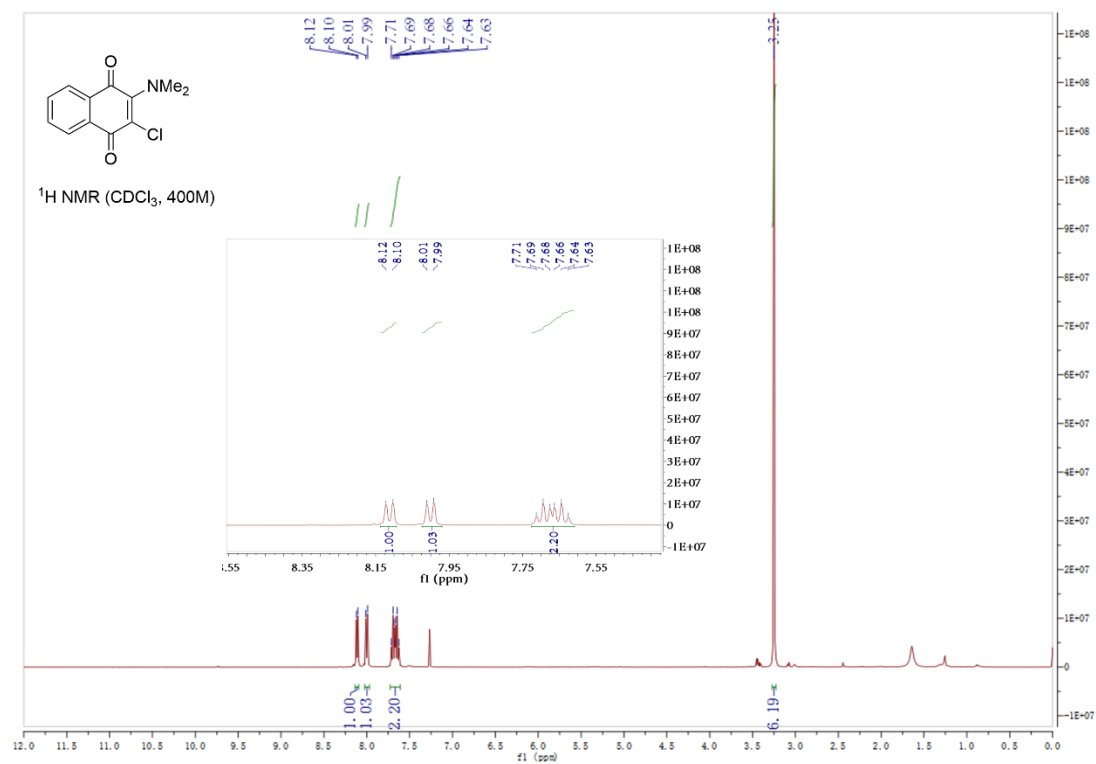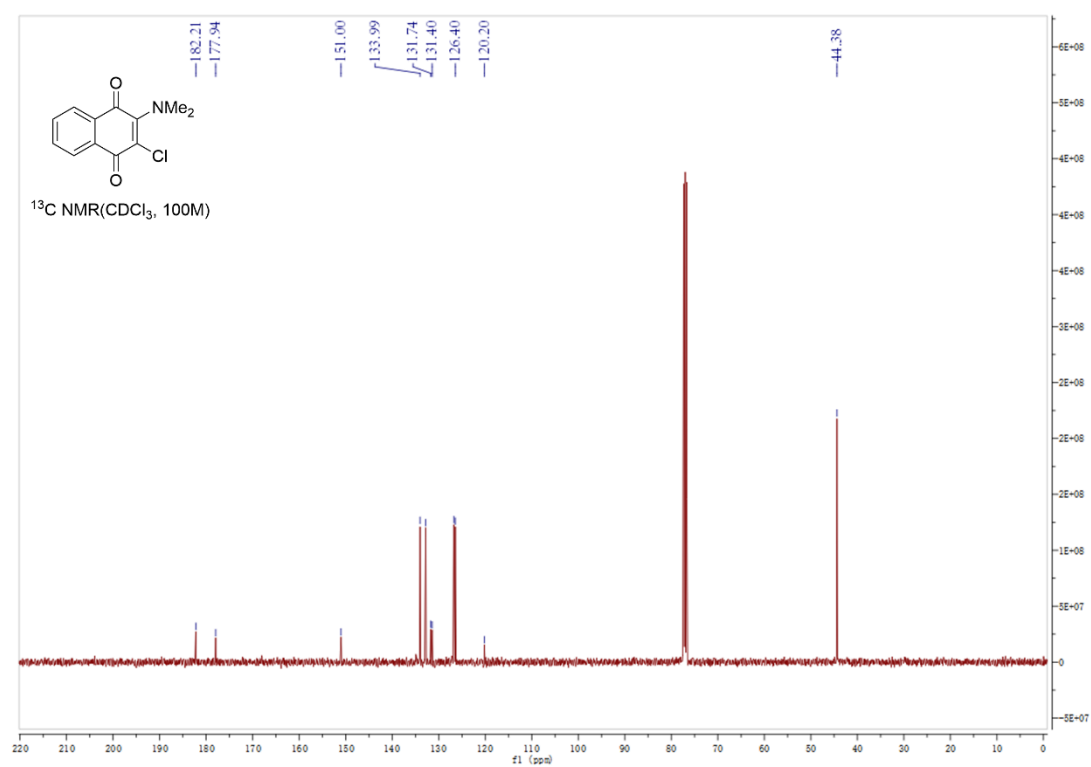

<sup>1</sup>H NMR of **4f** (400 MHz, CDCl<sub>3</sub>) and <sup>13</sup>C NMR of **4f** (100 MHz, CDCl<sub>3</sub>)



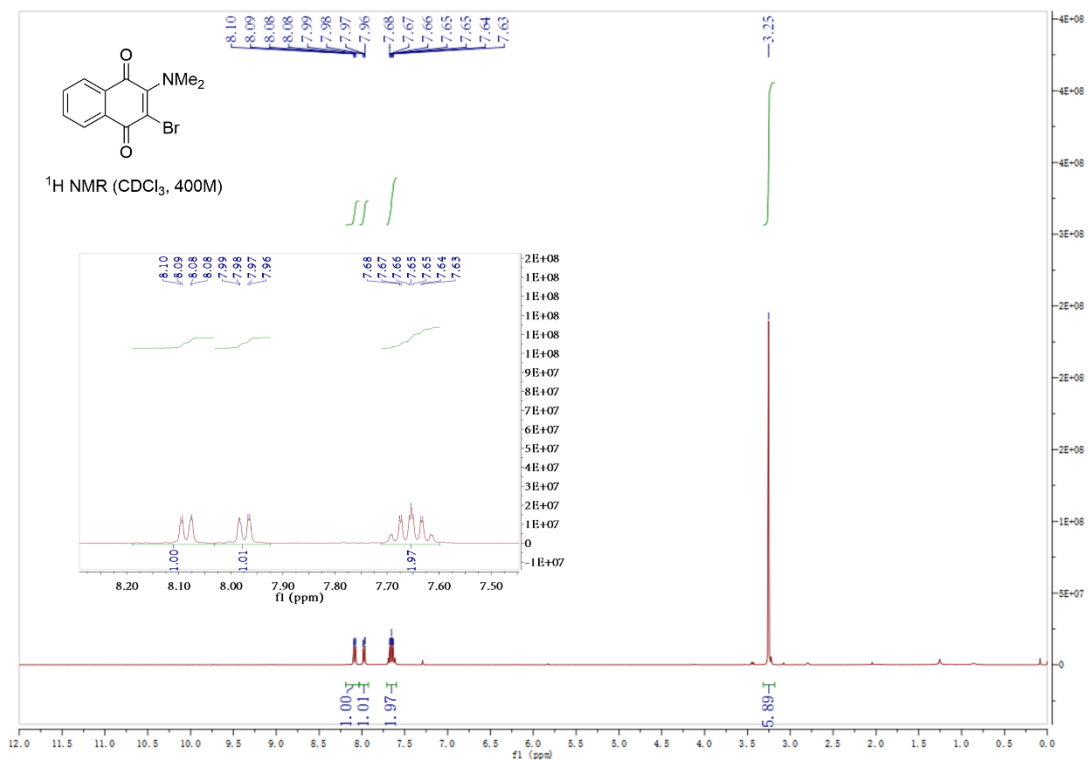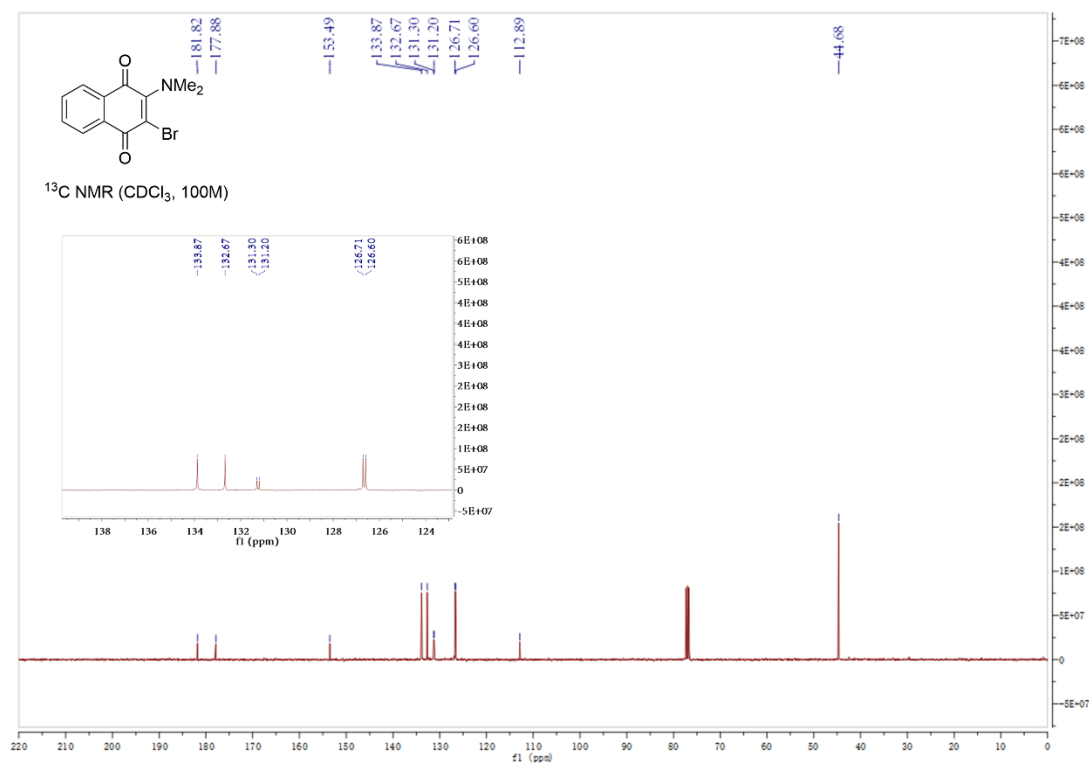

<sup>1</sup>H NMR of **4g** (400 MHz, CDCl<sub>3</sub>) and <sup>13</sup>C NMR of **4g** (100 MHz, CDCl<sub>3</sub>)

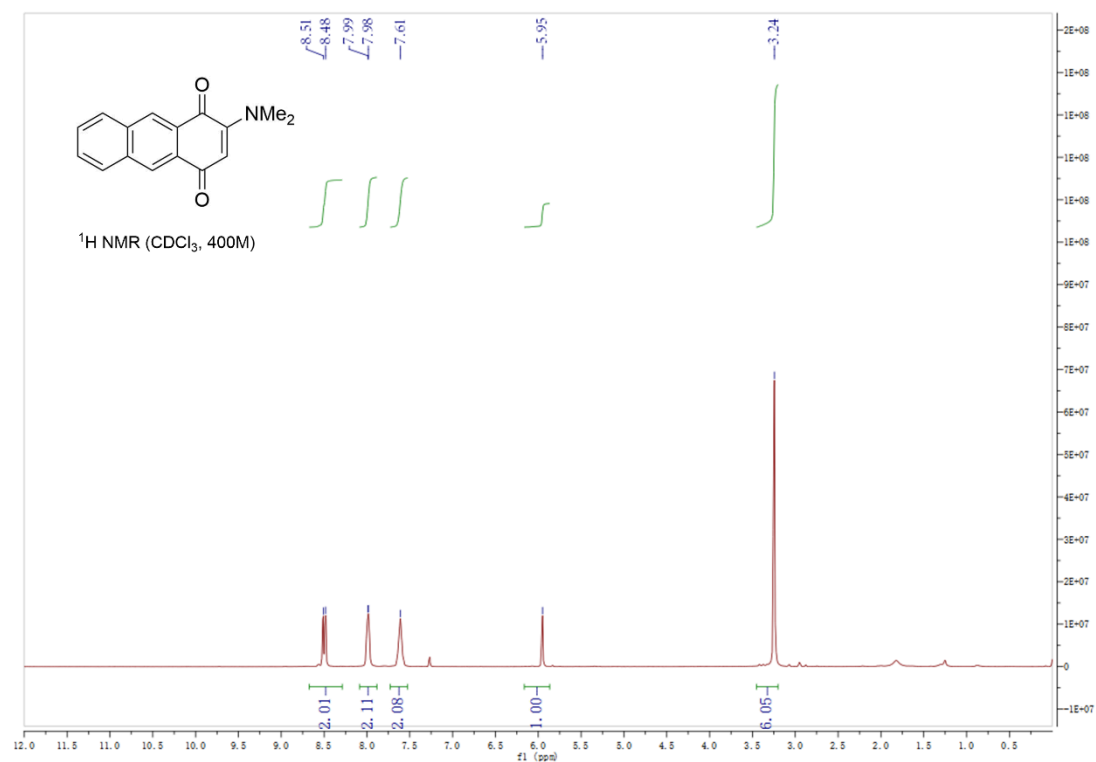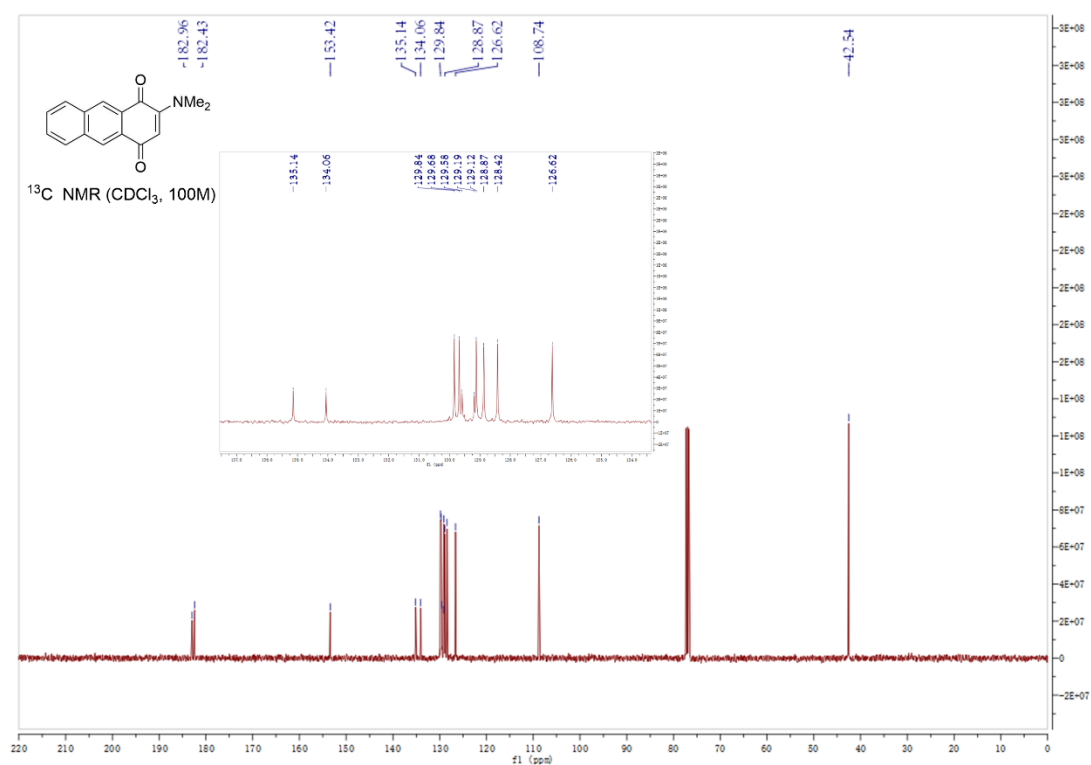

<sup>1</sup>H NMR of **4h** (400 MHz, CDCl<sub>3</sub>) and <sup>13</sup>C NMR of **4h** (100 MHz, CDCl<sub>3</sub>)

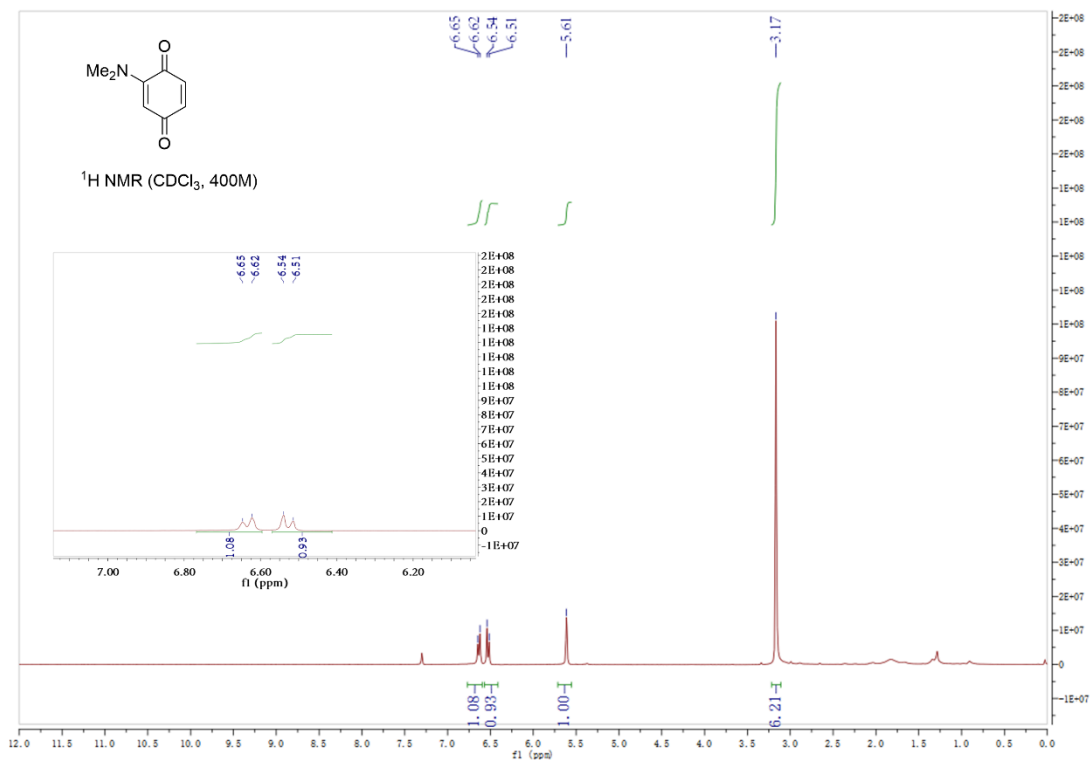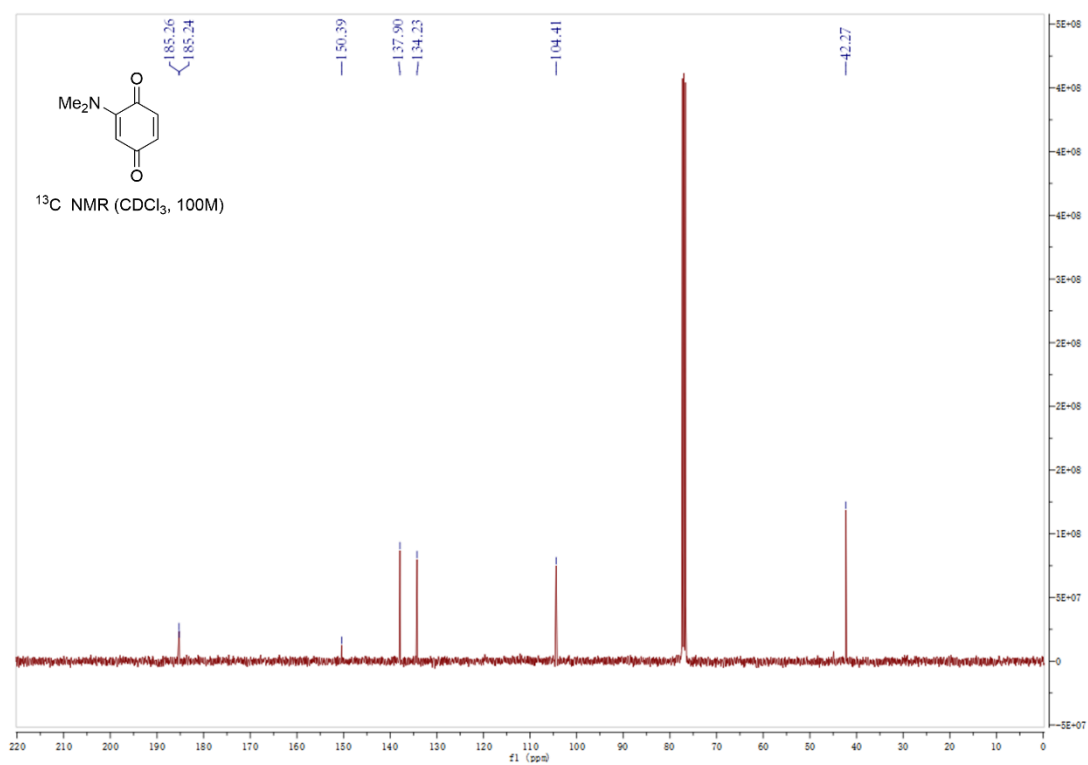

<sup>1</sup>H NMR of **4i** (400 MHz, CDCl<sub>3</sub>) and <sup>13</sup>C NMR of **4i** (100 MHz, CDCl<sub>3</sub>)

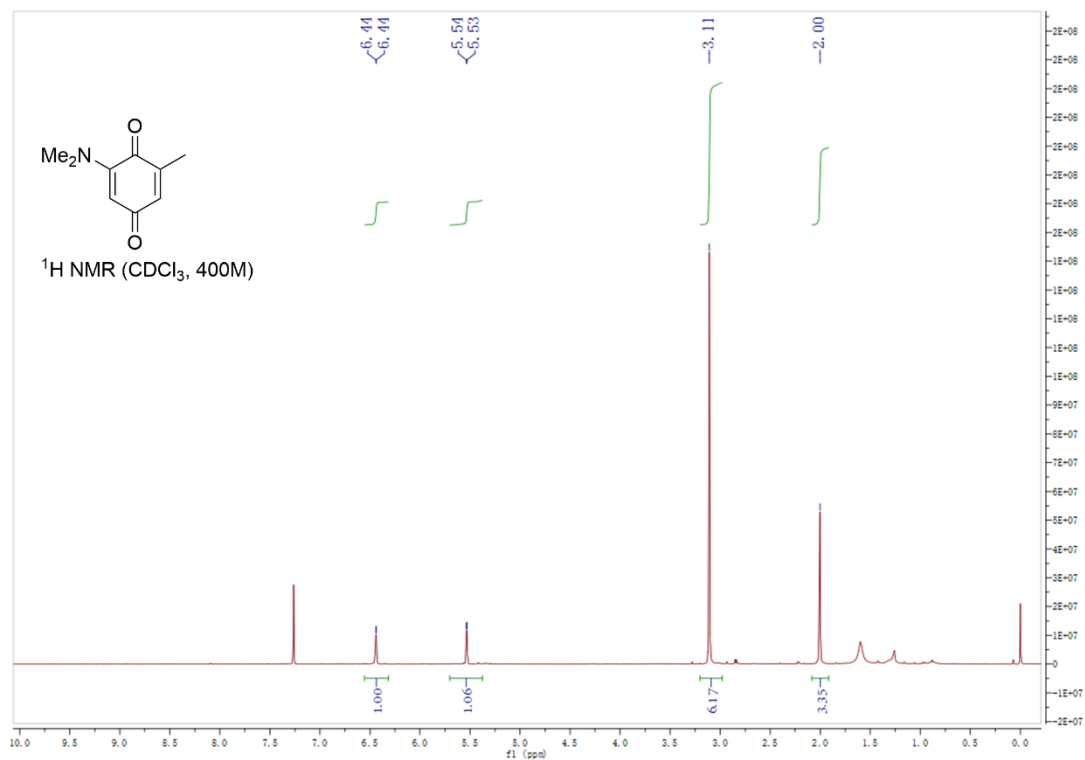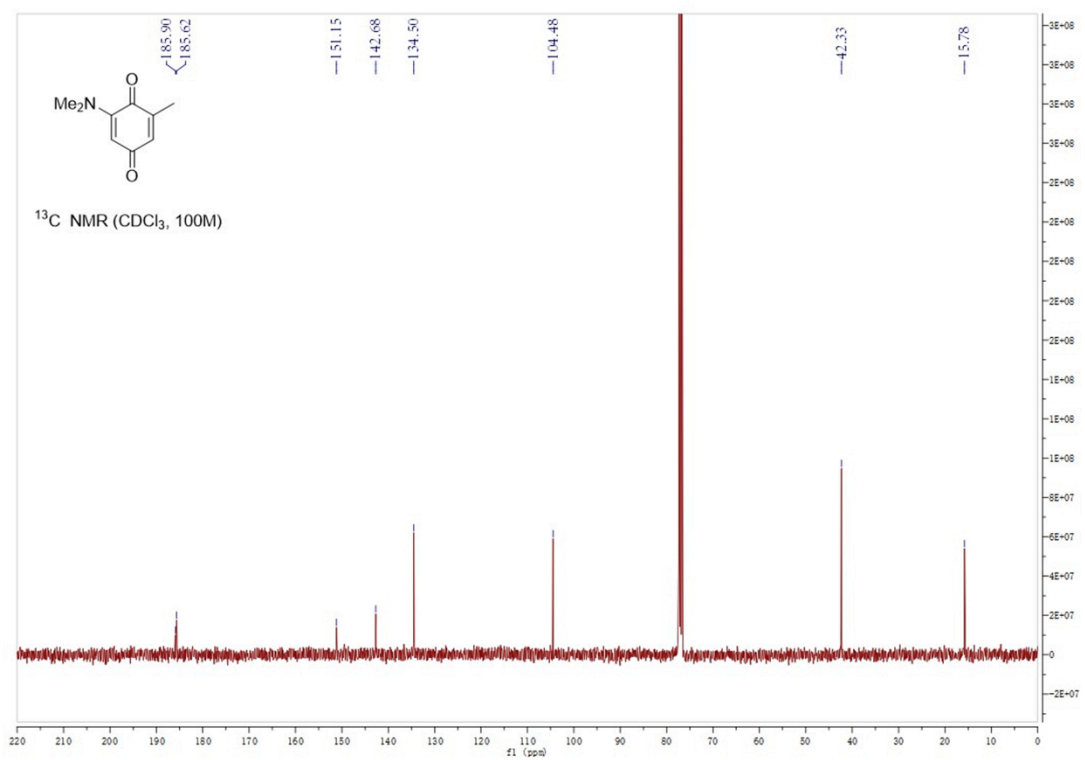

<sup>1</sup>H NMR of **4j** (6-NMe<sub>2</sub>) (400 MHz, CDCl<sub>3</sub>) and <sup>13</sup>C NMR of **4j** (6-NMe<sub>2</sub>) (100 MHz, CDCl<sub>3</sub>)

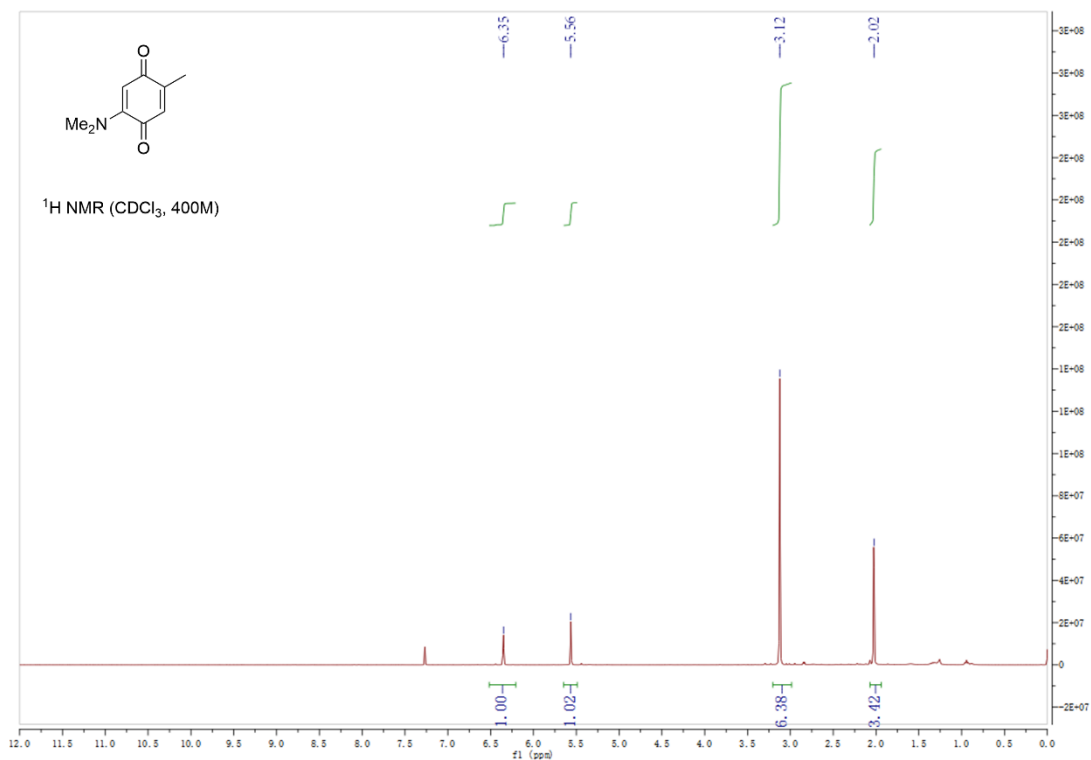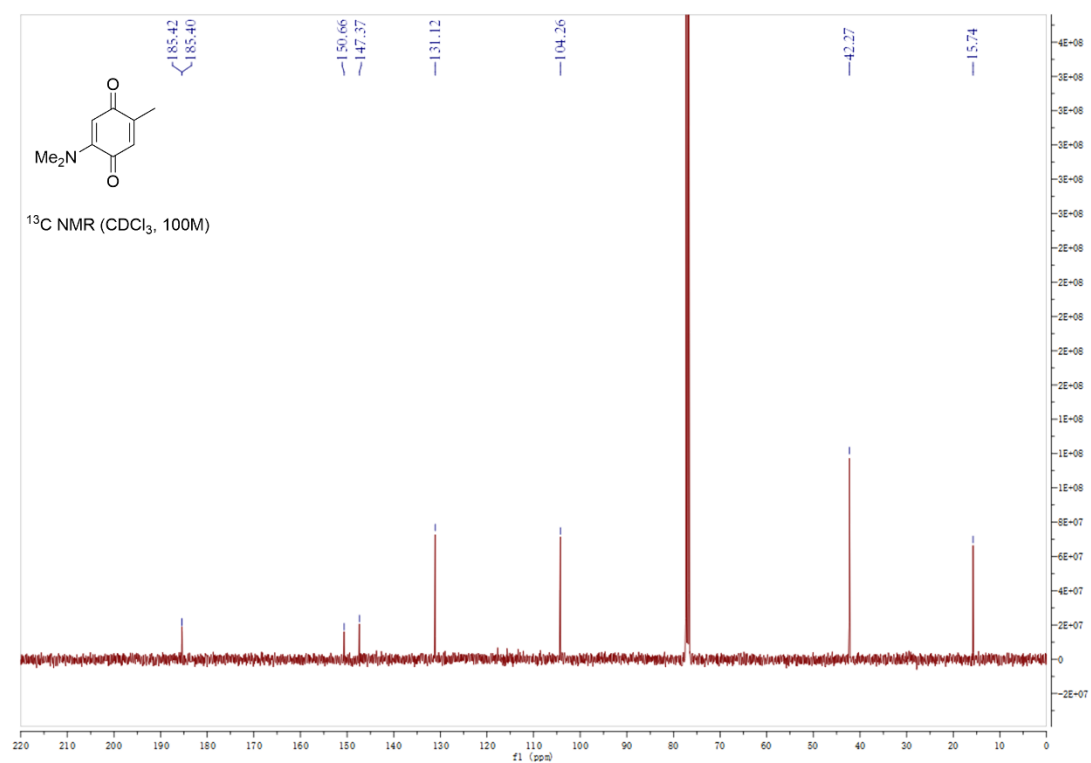

$^1\text{H NMR}$  of **4j** (5-NMe<sub>2</sub>) (400 MHz,  $\text{CDCl}_3$ ) and  $^{13}\text{C NMR}$  of **4j** (5-NMe<sub>2</sub>) (100 MHz,  $\text{CDCl}_3$ )

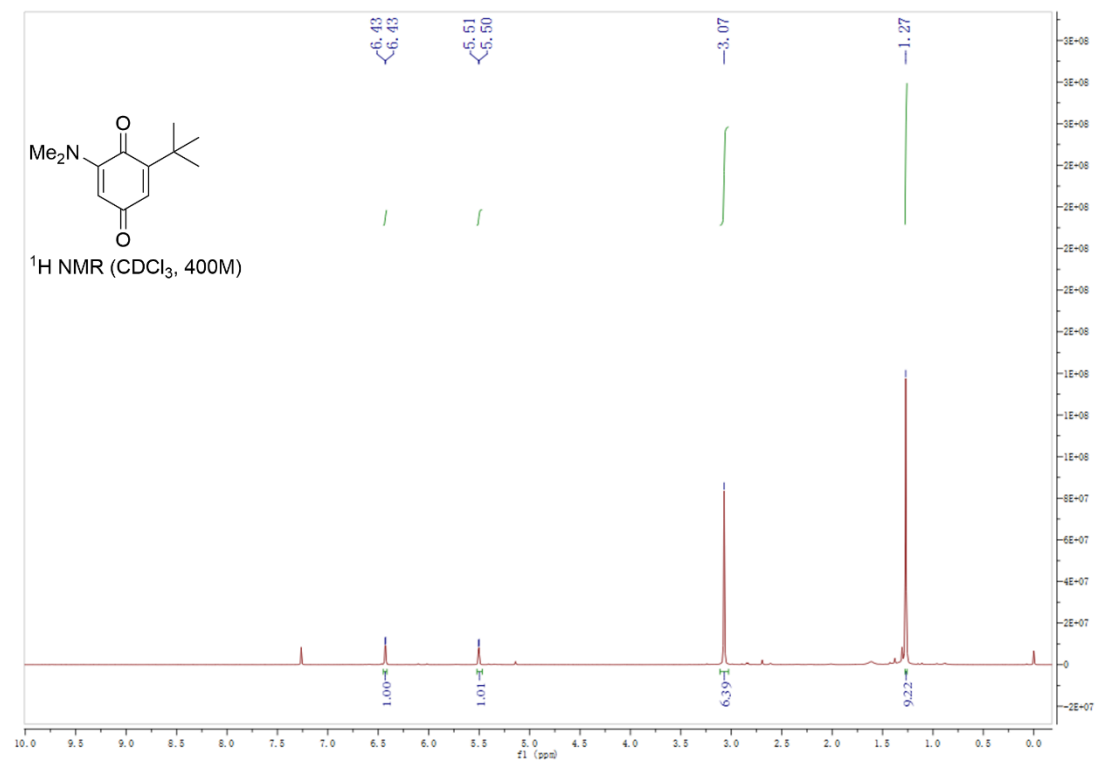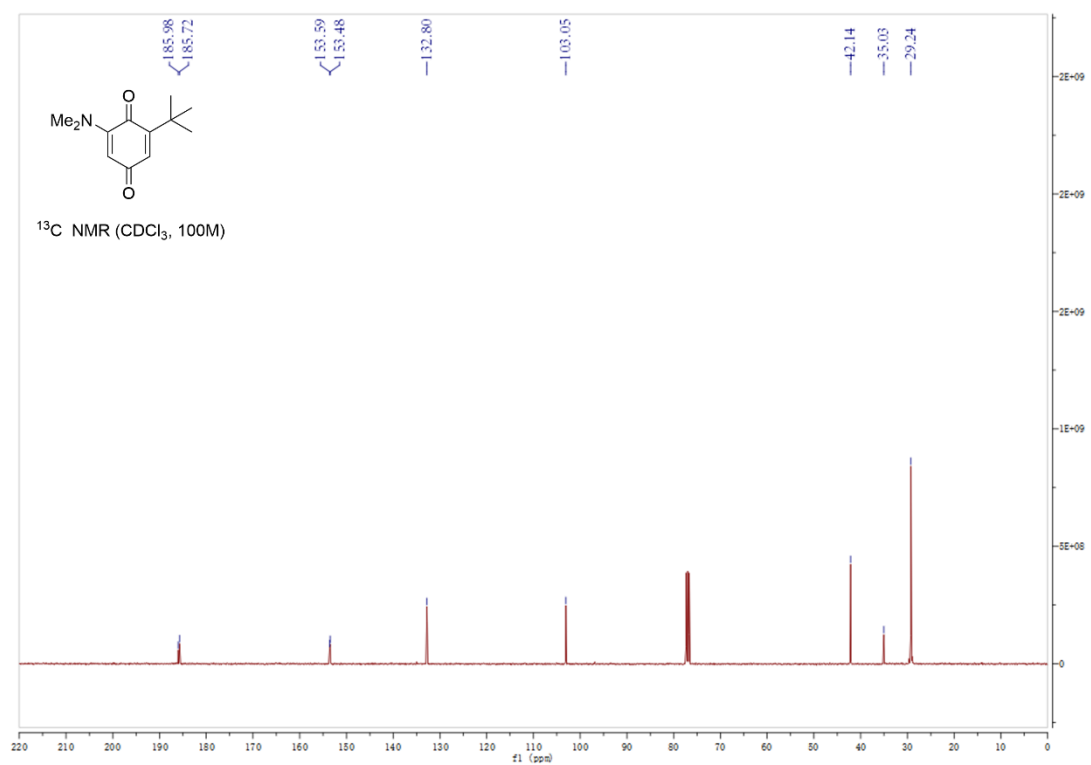

<sup>1</sup>H NMR of **4k** (6-NMe<sub>2</sub>) (400 MHz, CDCl<sub>3</sub>) and <sup>13</sup>C NMR of **4k** (6-NMe<sub>2</sub>) (100 MHz, CDCl<sub>3</sub>)

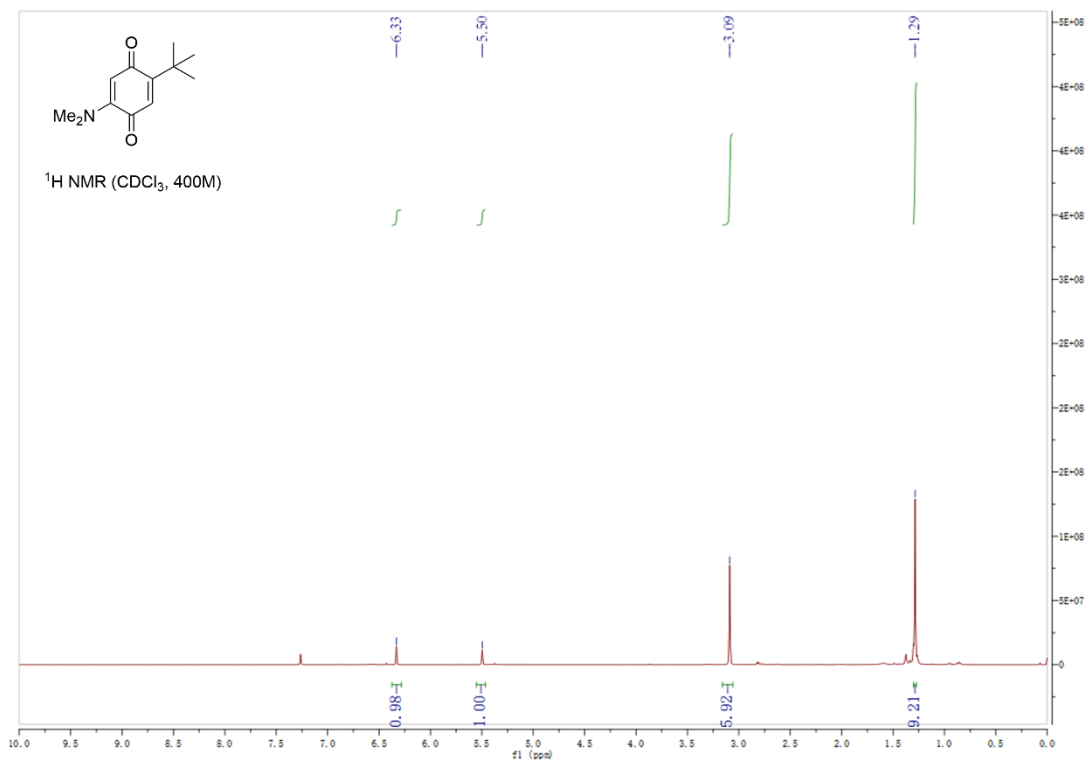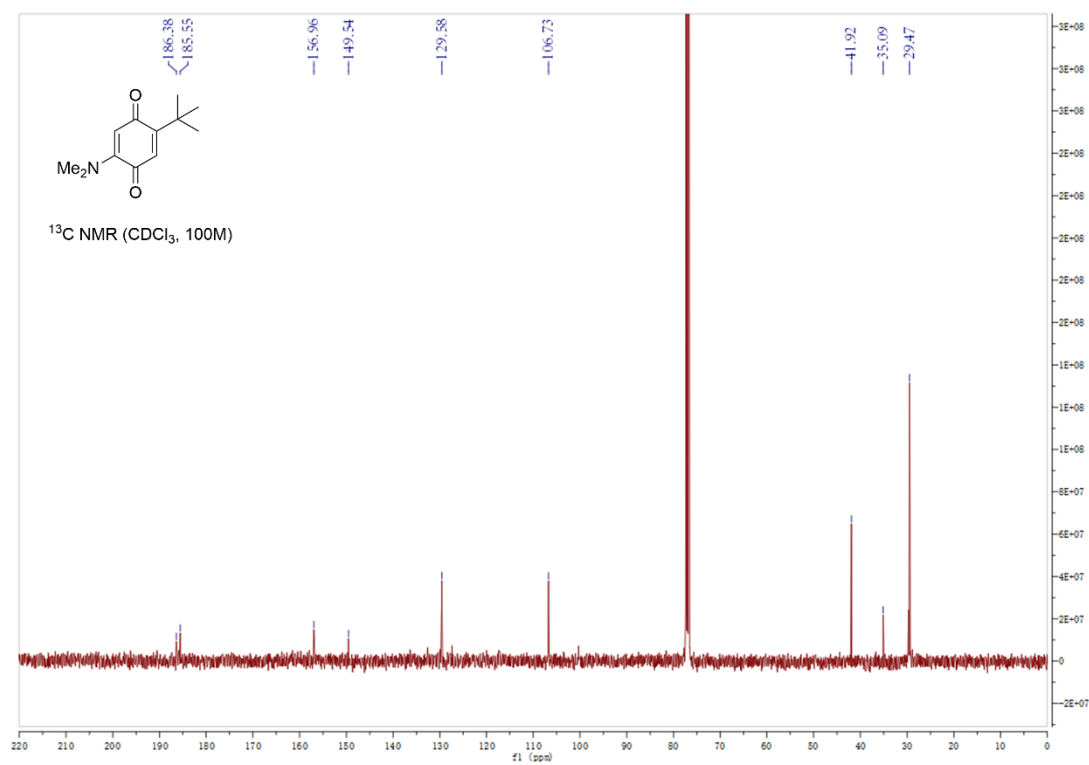

<sup>1</sup>H NMR of **4k** (**5-NMe<sub>2</sub>**) (400 MHz, CDCl<sub>3</sub>) and <sup>13</sup>C NMR of **4k** (**5-NMe<sub>2</sub>**) (100 MHz, CDCl<sub>3</sub>)

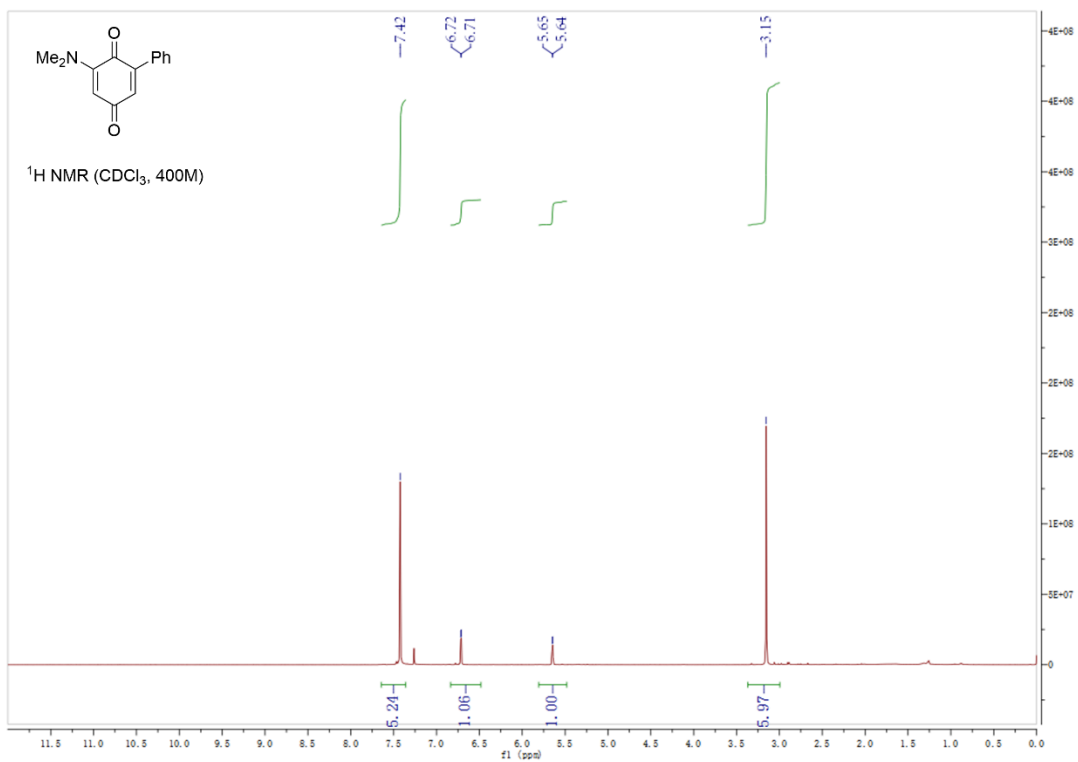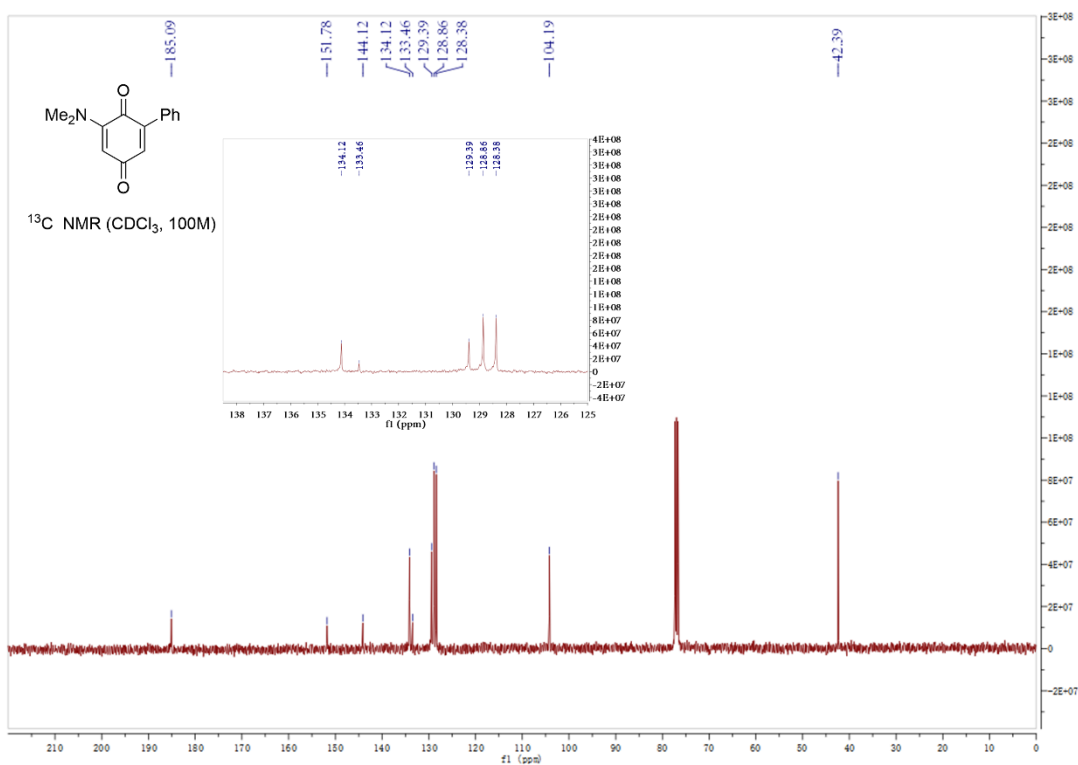

<sup>1</sup>H NMR of **4l** (6-NMe<sub>2</sub>) (400 MHz, CDCl<sub>3</sub>) and <sup>13</sup>C NMR of **4l** (6-NMe<sub>2</sub>) (100 MHz, CDCl<sub>3</sub>)



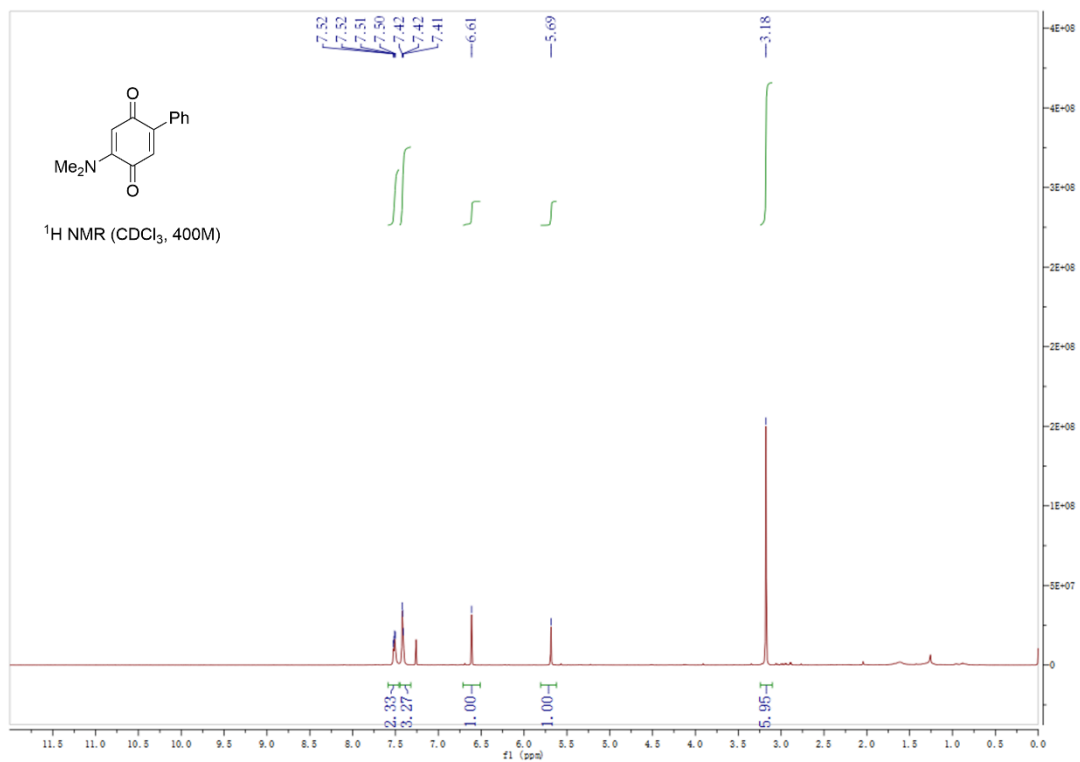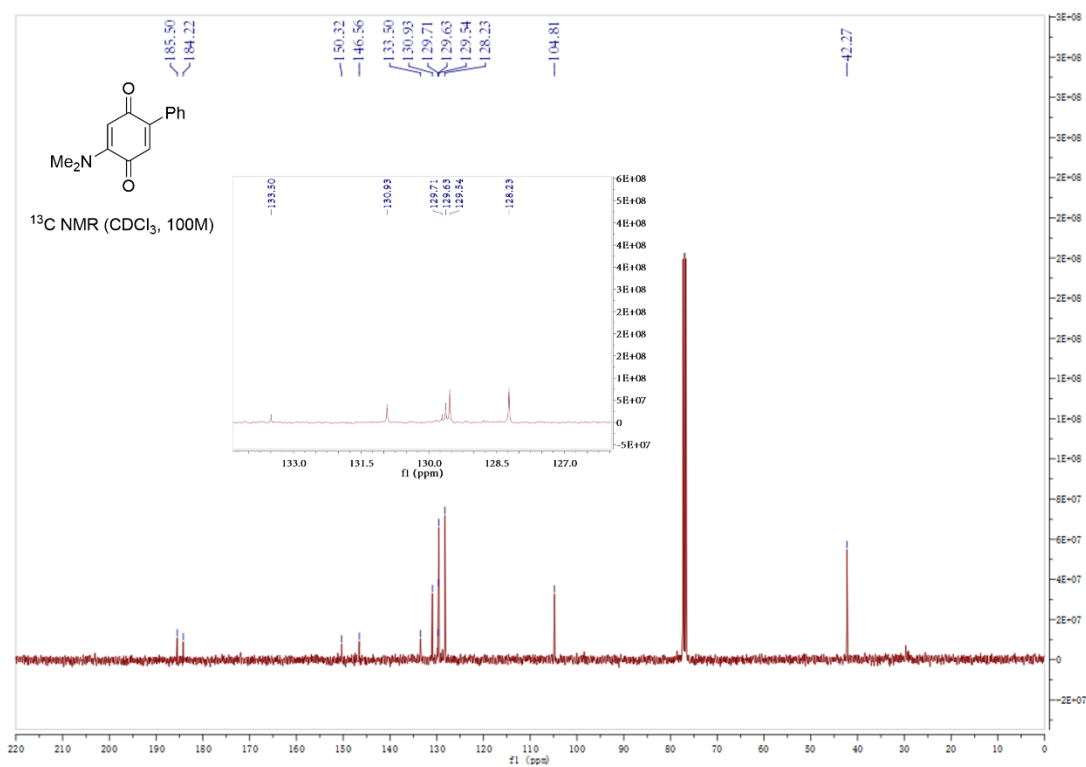

<sup>1</sup>H NMR of **4I** (5-NMe<sub>2</sub>) (400 MHz, CDCl<sub>3</sub>) and <sup>13</sup>C NMR of **4I** (5-NMe<sub>2</sub>) (100 MHz, CDCl<sub>3</sub>)

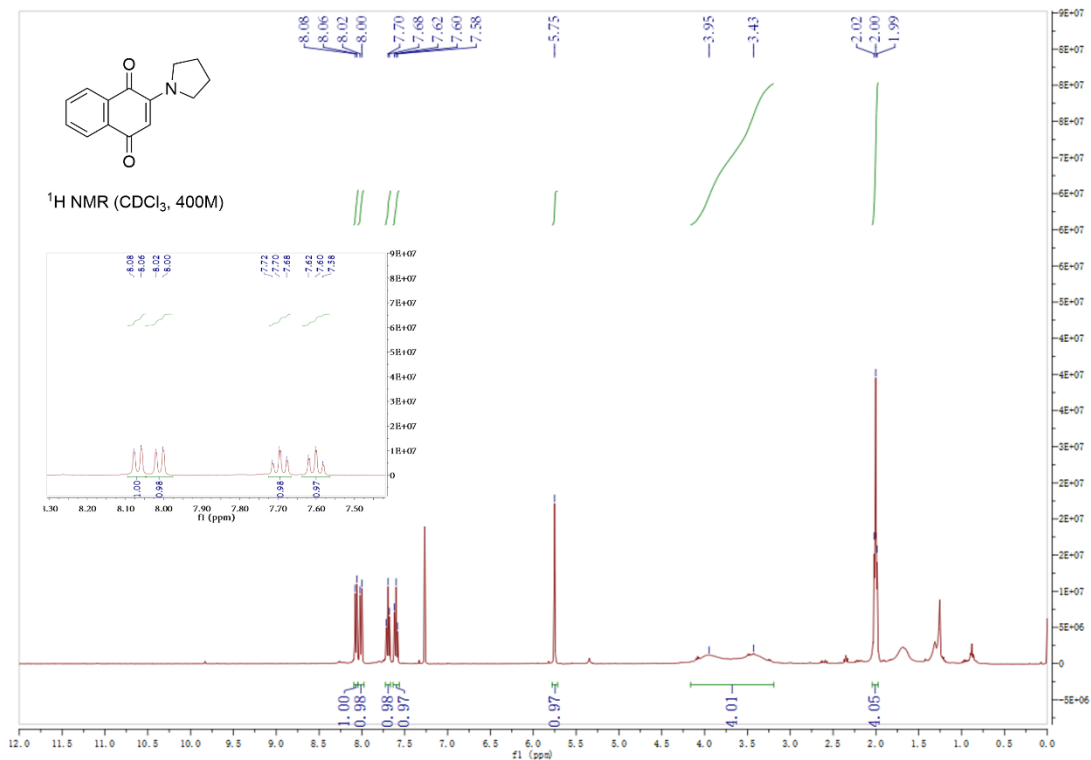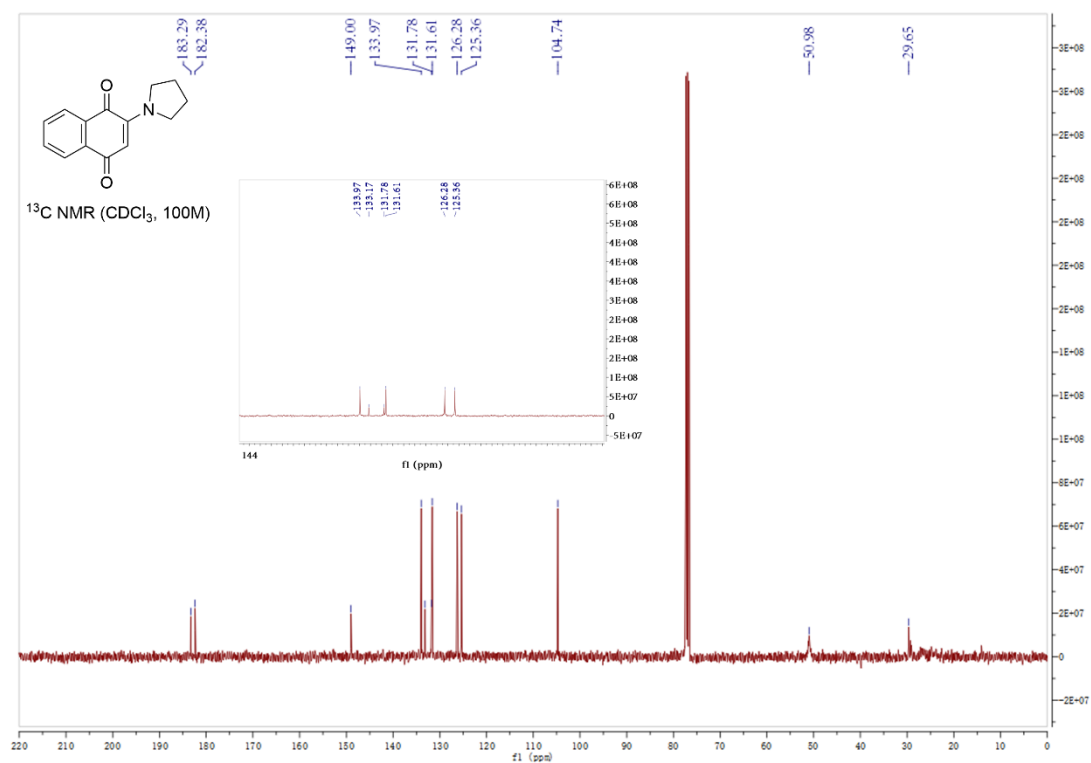

<sup>1</sup>H NMR of **4m** (400 MHz, CDCl<sub>3</sub>) and <sup>13</sup>C NMR of **4m** (100 MHz, CDCl<sub>3</sub>)

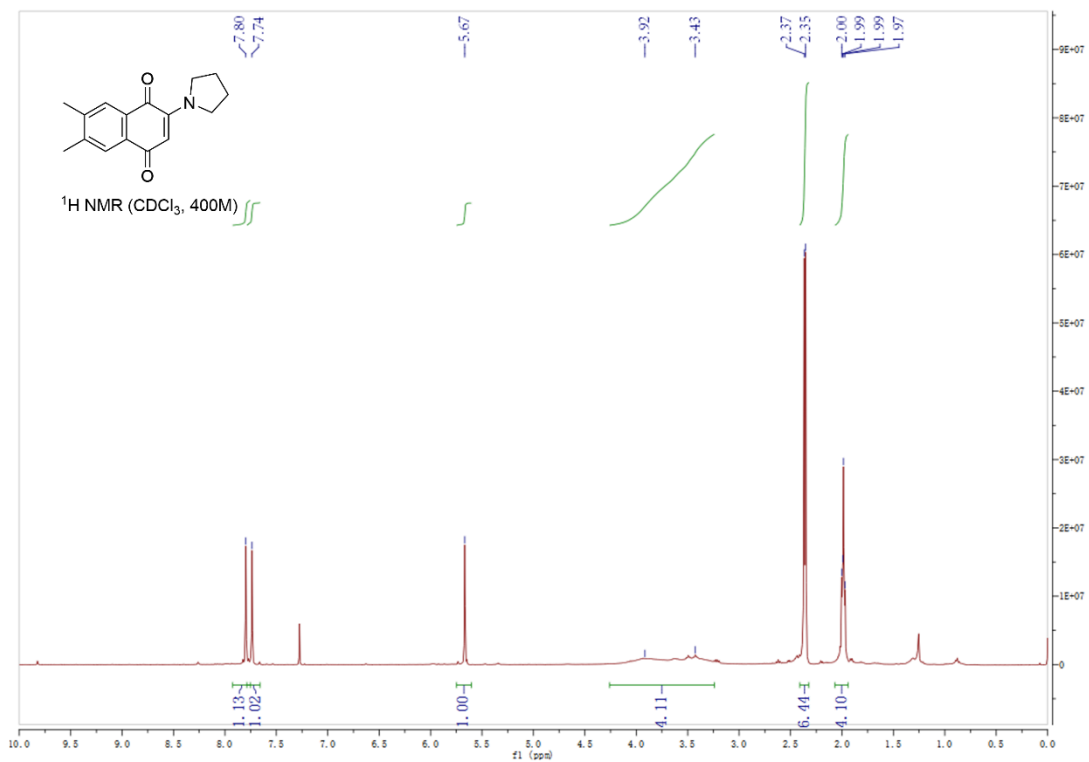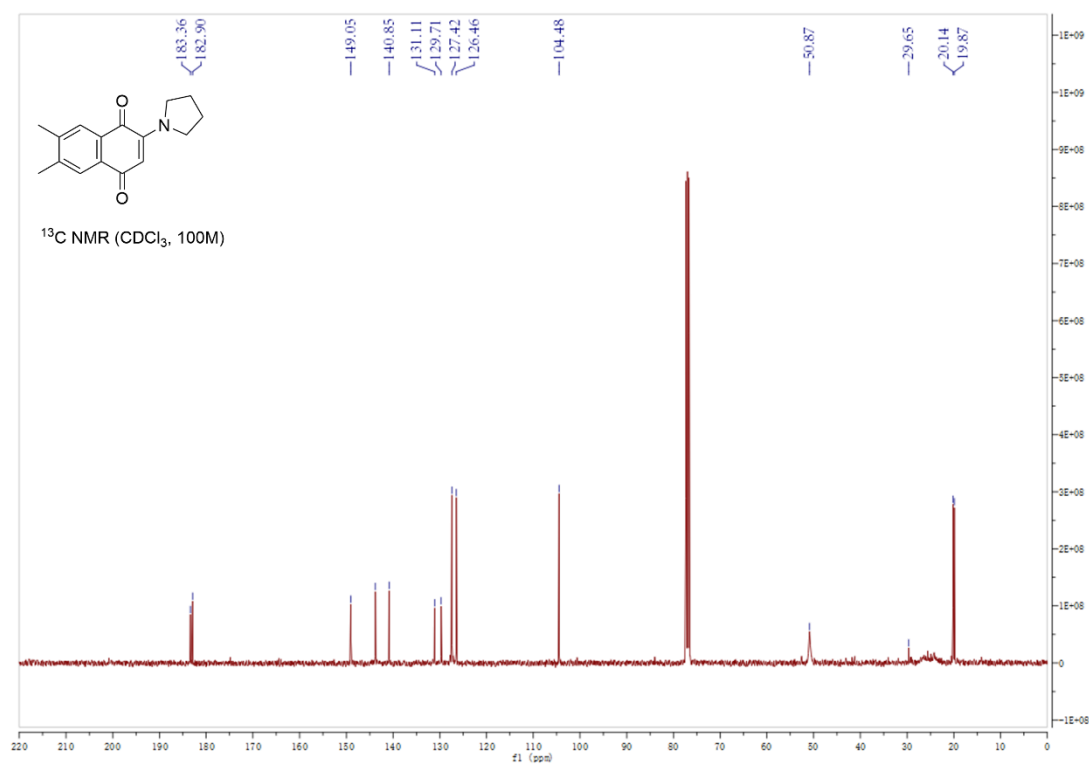

<sup>1</sup>H NMR of **4n** (400 MHz, CDCl<sub>3</sub>) and <sup>13</sup>C NMR of **4n** (100 MHz, CDCl<sub>3</sub>)

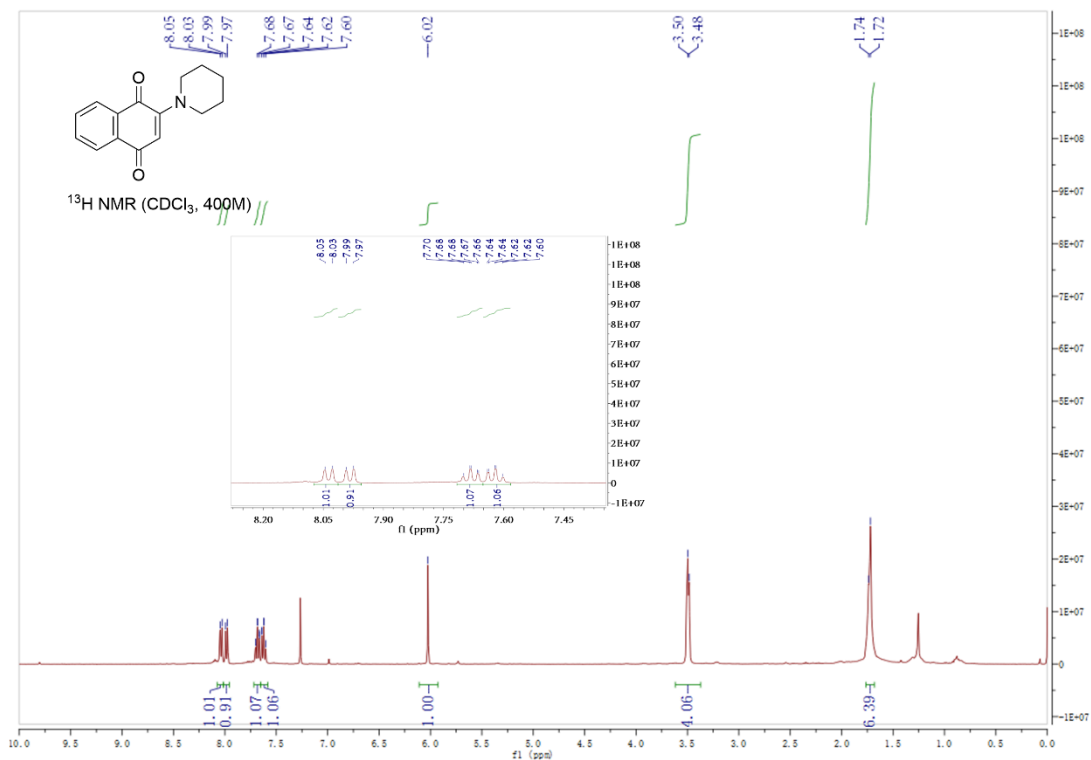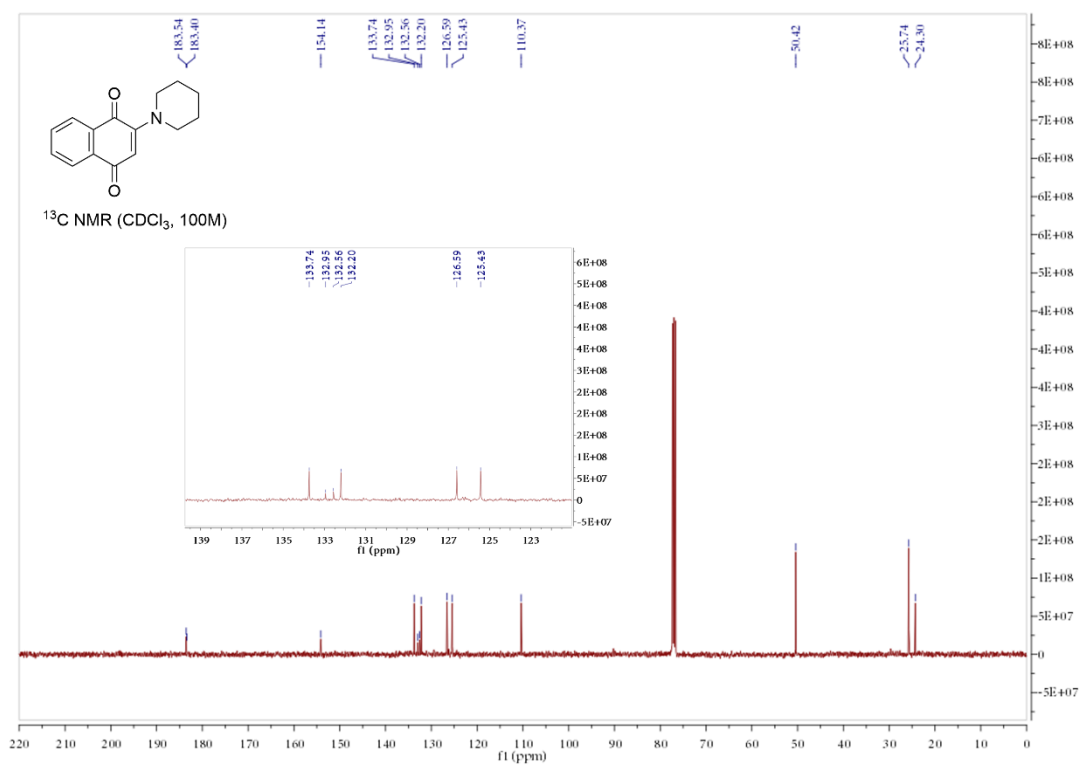

<sup>1</sup>H NMR of **4o** (400 MHz, CDCl<sub>3</sub>) and <sup>13</sup>C NMR of **4o** (100 MHz, CDCl<sub>3</sub>)

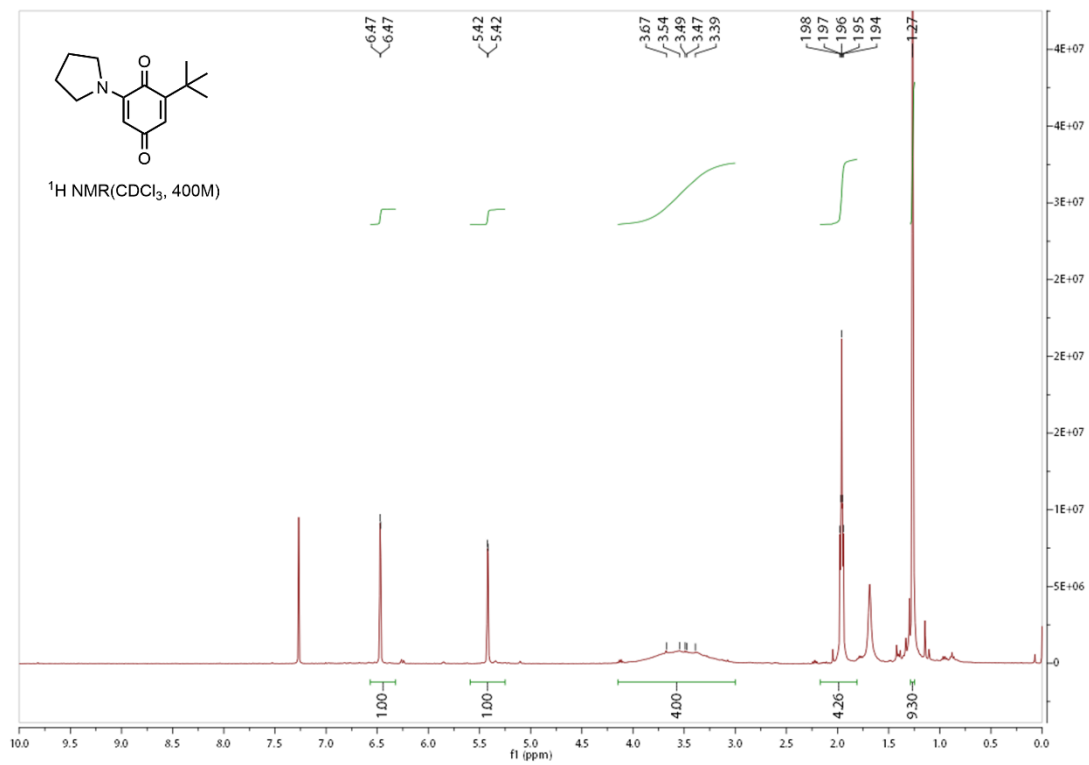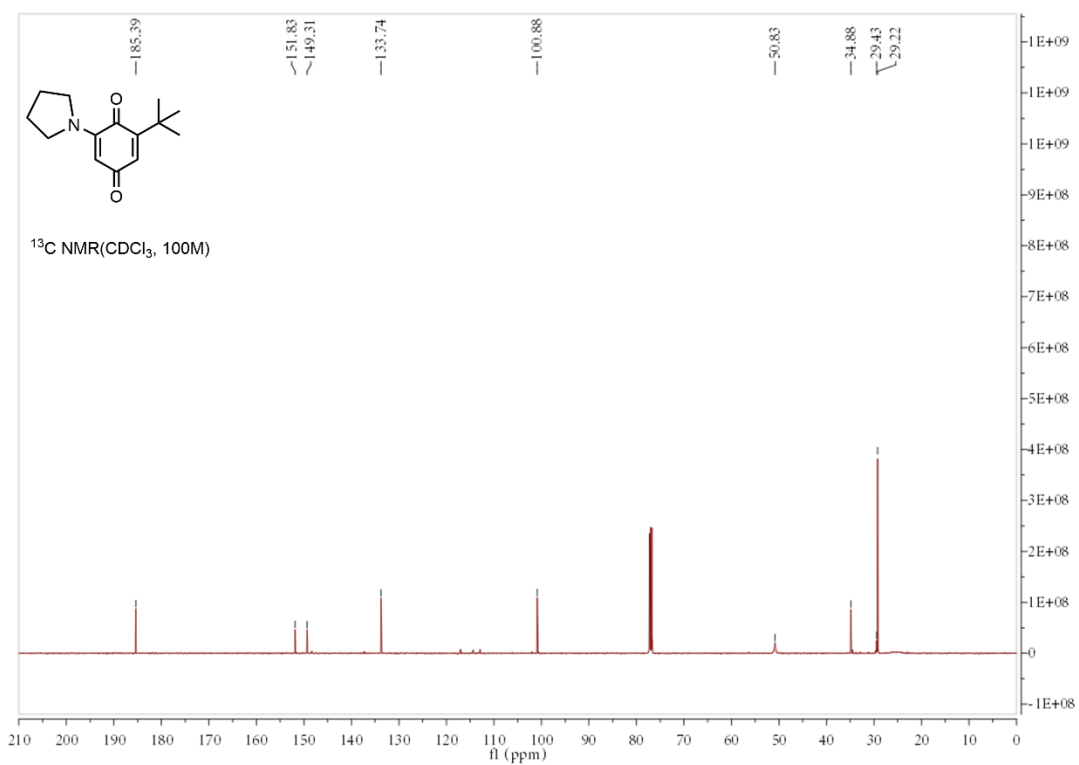

<sup>1</sup>H NMR of **4p (6-NMe<sub>2</sub>)** (400 MHz, CDCl<sub>3</sub>) and <sup>13</sup>C NMR of **4p (6-NMe<sub>2</sub>)** (100 MHz, CDCl<sub>3</sub>)

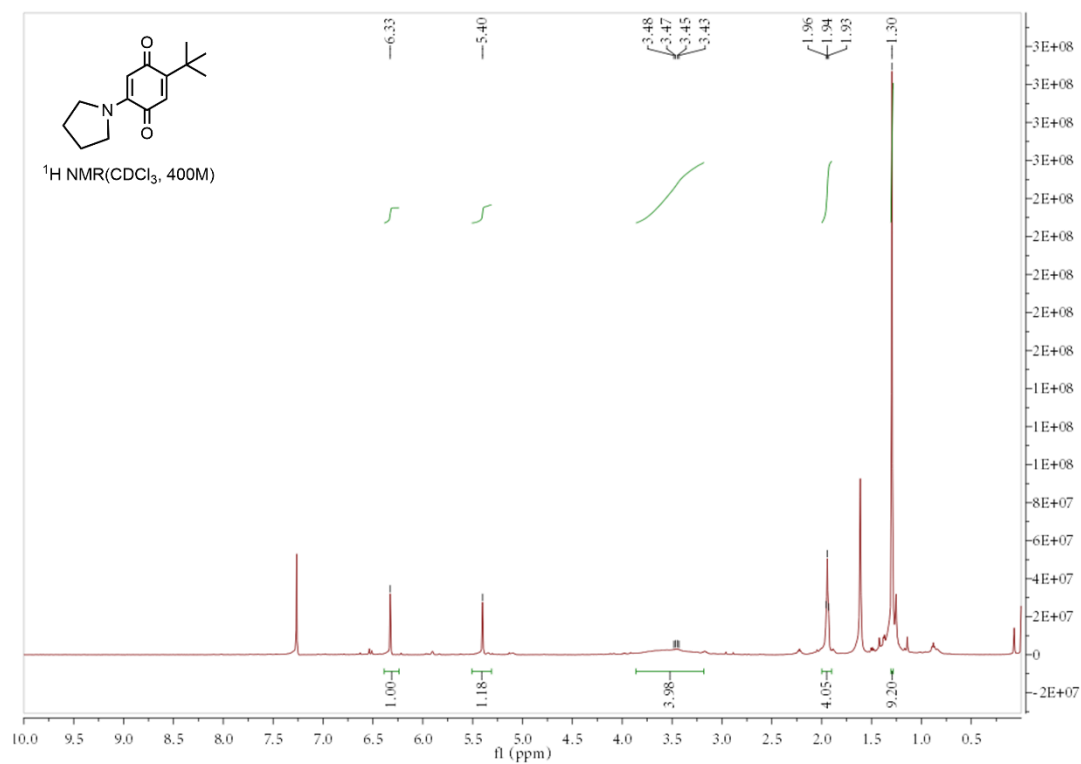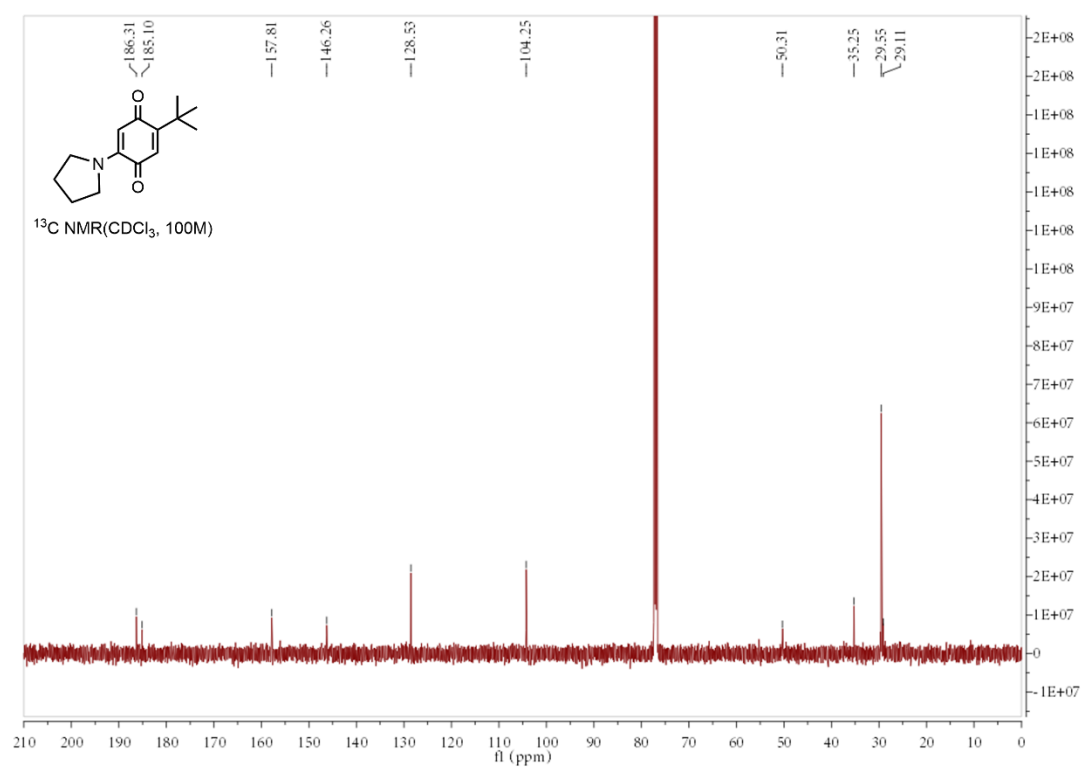

<sup>1</sup>H NMR of **4p** (**5-NMe<sub>2</sub>**) (400 MHz, CDCl<sub>3</sub>) and <sup>13</sup>C NMR of **4p** (**5-NMe<sub>2</sub>**) (100 MHz, CDCl<sub>3</sub>)

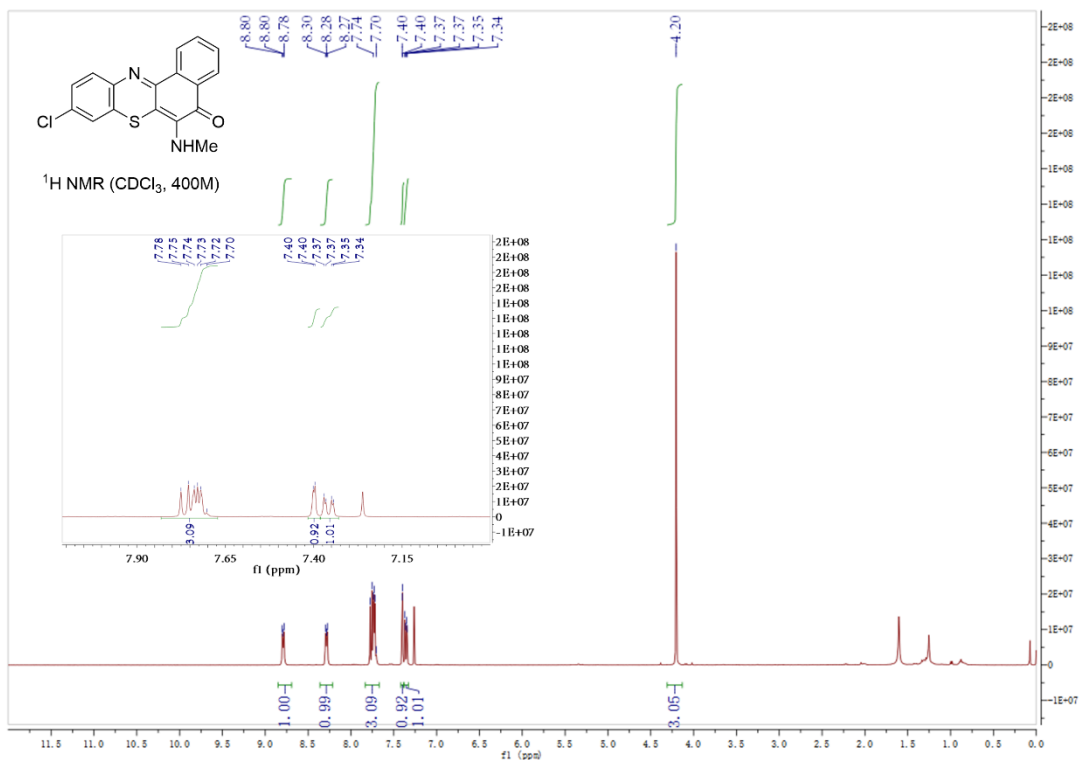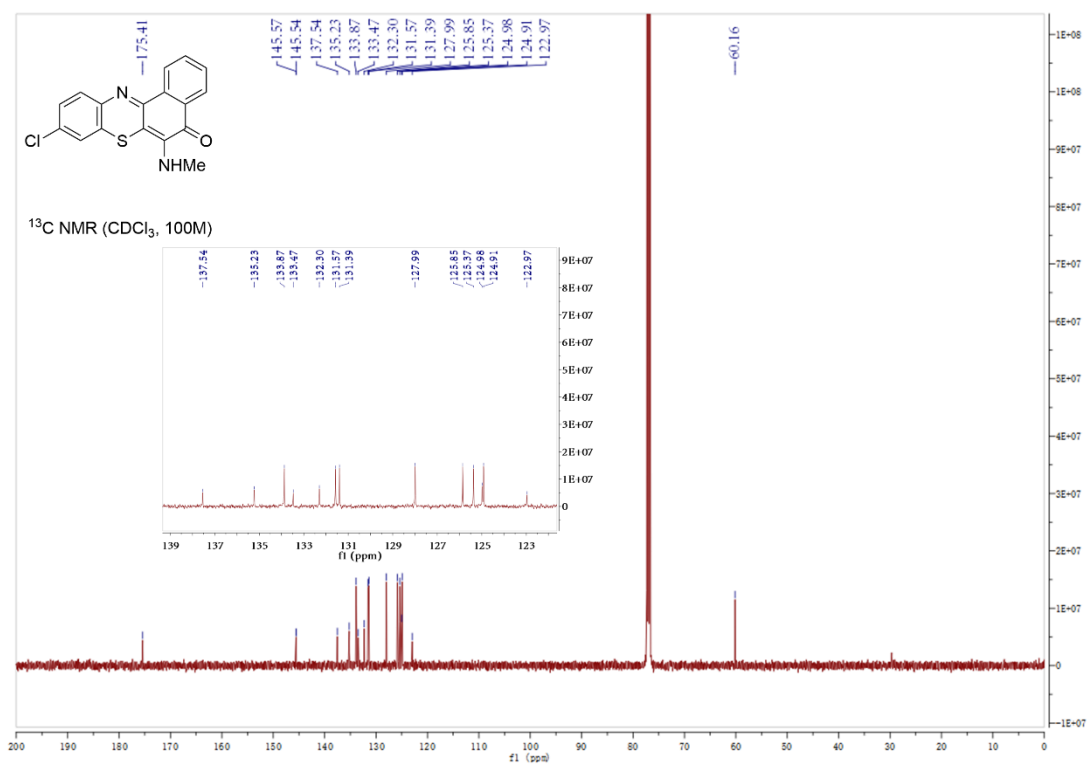

<sup>1</sup>H NMR of **8** (400 MHz, CDCl<sub>3</sub>) and <sup>13</sup>C NMR of **8** (100 MHz, CDCl<sub>3</sub>)

## 7. DFT calculations

### 7.1 Computational Details

All the DFT calculations were carried out with the Gaussian 09 suite of computational programs.<sup>[14]</sup> The geometries of all stationary points were optimized using the B3LYP hybrid functional<sup>[15]</sup> and D3 version of Grimme's dispersion corrections<sup>[16]</sup> with Becke-Johnson damping<sup>[17]</sup> in DMF, at 6-31g(d)<sup>[18]</sup> basis set by using the Solvation Model based on Density (SMD)<sup>[19]</sup> with keyword in the Gaussian code route section "SCRF = (SMD, Solvent = DMF)". Frequencies were analytically computed at the same level of theory to obtain the Gibbs free energies and to confirm whether the structures are minima (no imaginary frequency) or transition states (only one imaginary frequency). The M06L functional<sup>[20,21]</sup> in combination with the 6-311+g(d,p) basis set<sup>[18]</sup> was used to calculate the solvation single point energies to give more accurate energy information. The solvent effects were considered with an SMD solvation model in the DMF solvent. All transition state structures were confirmed to connect the proposed reactants and products by intrinsic reaction coordinate (IRC) calculations. All the energies given in the text are relative free energies corrected with solvation effects.

### 7.2 Additional Computational Results

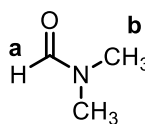

The chemical structure shows N,N-dimethylacetamide (CH<sub>3</sub>C(=O)N(CH<sub>3</sub>)<sub>2</sub>). The C-H bond of the methyl group attached to the carbonyl carbon is labeled 'a'. The C-H bond of the methyl group attached to the nitrogen atom is labeled 'b'.

| C-H bond:                 | a     | b                         |
|---------------------------|-------|---------------------------|
| CBS-QB3/M052X/6-31G*      |       |                           |
| //M052X/6-311+G(d,p)/SMD: | 38.21 | 52.97                     |
| HCOOH                     |       |                           |
| CBS-QB3/M052X/6-31G*      |       |                           |
| //M052X/6-311+G(d,p)/SMD: | 4.33  | (experimental value 3.76) |

Figure S7 Calculated pKa values of different C–H bonds (CBS-QB3/M052X/6-31G\*//M052X/6-311+G(d,p)/SMD)

The data were calculated for the standard state of 298 K and 1 atm in the solvent DMF.

The calculation result is calibrated by formic acid.



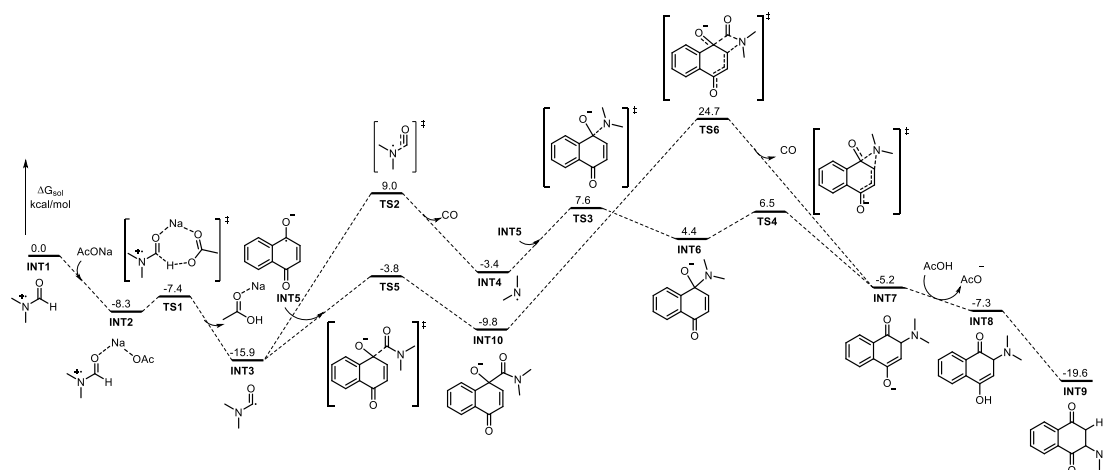

Figure S8 Energy profile for the electrooxidative amination using 4a as arene (M06L/6-311+G(d,p)-SMD(DMF)//B3LYP-D3(BJ)/6-31G(d)-SMD(DMF))

### 7.3 Calculated Energy Values

Table S5. Energies (in Hartree) calculated by M06L/6-311+G(d,p)-SMD(DMF)//B3LYP-D3(BJ)/6-31G(d)-SMD(DMF) level.

| Species          | G <sub>298</sub> <sup>a</sup> | E <sub>298</sub> <sup>b</sup> | E <sub>sol</sub> <sup>c</sup> | Imaginary Frequency |
|------------------|-------------------------------|-------------------------------|-------------------------------|---------------------|
| INT1             | -248.237277                   | -248.3071426                  | -248.324571669                |                     |
| AcONa            | -390.846577                   | -390.8672767                  | -390.896382669                |                     |
| INT2             | -639.104153                   | -639.2117033                  | -639.251223896                |                     |
| TS1              | -639.098111                   | -639.2061086                  | -639.250154153                | -234.4332           |
| AcOHNa           | -391.287702                   | -391.3185937                  | -391.348775304                |                     |
| INT3             | -247.8147160                  | -247.8749760                  | -247.898098881                |                     |
| TS2              | -247.774111                   | -247.8281301                  | -247.852182093                | -374.6619           |
| CO               | -113.319634                   | -113.3055241                  | -113.325592813                |                     |
| INT4             | -134.471024                   | -134.5216060                  | -134.528793453                |                     |
| INT5             | -535.191725                   | -535.2888828                  | -535.335776221                |                     |
| TS3              | -669.648522                   | -669.8218838                  | -669.872656833                | -170.0418           |
| INT6             | -669.654142                   | -669.8296757                  | -669.879910835                |                     |
| TS4              | -669.649035                   | -669.8215984                  | -669.873564721                | -94.0919            |
| INT7             | -669.671813                   | -669.8475015                  | -669.895461850                |                     |
| AcOH             | -229.063235                   | -229.0979480                  | -229.138666891                |                     |
| AcO <sup>-</sup> | -228.574318                   | -228.5969248                  | -228.654520666                |                     |
| INT8             | -670.160163                   | -670.3502693                  | -670.385275542                |                     |
| INT9             | -670.183024                   | -670.3732338                  | -670.404908621                |                     |
| TS5              | -782.988482                   | -783.1697411                  | -783.238462493                | -247.8498           |
| INT10            | -782.996543                   | -783.1799835                  | -783.250186534                |                     |
| TS6              | -782.945306                   | -783.1269078                  | -783.193300703                | -295.9557           |

<sup>a</sup>Sum of electronic and thermal free energies. <sup>b</sup>Sum of electronic energies. <sup>c</sup>Single point energies calculated in DMF solution.

## 7.4 Cartesian Coordinates for All Species

### INT1

|   |             |             |             |
|---|-------------|-------------|-------------|
| N | -2.58381700 | 1.17392000  | -0.01717700 |
| C | -2.76266900 | 1.86816700  | 1.22158400  |
| H | -2.75517600 | 1.20549600  | 2.09408500  |
| O | -2.89497500 | 3.06855800  | 1.23850800  |
| C | -2.54029700 | 1.90540000  | -1.25547700 |
| H | -1.47780200 | 2.05251500  | -1.51330900 |
| H | -2.99879500 | 1.30032400  | -2.04150500 |
| H | -3.01904500 | 2.87572700  | -1.13532900 |
| C | -2.41760100 | -0.25269400 | -0.01658300 |
| H | -2.25699700 | -0.62069300 | 0.99605500  |
| H | -3.33450100 | -0.69604300 | -0.43968300 |
| H | -1.59162400 | -0.51483500 | -0.68748600 |

### AcONa

|   |             |             |             |
|---|-------------|-------------|-------------|
| N | -2.58381700 | 1.17392000  | -0.01717700 |
| C | -2.76266900 | 1.86816700  | 1.22158400  |
| H | -2.75517600 | 1.20549600  | 2.09408500  |
| O | -2.89497500 | 3.06855800  | 1.23850800  |
| C | -2.54029700 | 1.90540000  | -1.25547700 |
| H | -1.47780200 | 2.05251500  | -1.51330900 |
| H | -2.99879500 | 1.30032400  | -2.04150500 |
| H | -3.01904500 | 2.87572700  | -1.13532900 |
| C | -2.41760100 | -0.25269400 | -0.01658300 |
| H | -2.25699700 | -0.62069300 | 0.99605500  |
| H | -3.33450100 | -0.69604300 | -0.43968300 |
| H | -1.59162400 | -0.51483500 | -0.68748600 |

### INT2

|   |             |             |             |
|---|-------------|-------------|-------------|
| N | -2.44423500 | 1.09120300  | -0.36922900 |
| C | -3.11243300 | 1.40967200  | 0.73972800  |
| H | -3.05714000 | 0.64466800  | 1.52586900  |
| O | -3.75166100 | 2.46746000  | 0.90860800  |
| C | -2.41717100 | 1.97586700  | -1.52617500 |
| H | -1.38127200 | 2.23643300  | -1.76821800 |
| H | -2.86419000 | 1.47089500  | -2.38948600 |
| H | -2.97977300 | 2.88046100  | -1.29873900 |
| C | -1.72986500 | -0.17259800 | -0.48759700 |
| H | -1.82334000 | -0.73834300 | 0.44165800  |
| H | -2.14589800 | -0.76242500 | -1.31170600 |
| H | -0.66974200 | 0.01546200  | -0.68866800 |
| C | -6.27372000 | 1.14531200  | 6.06681200  |
| H | -7.16830500 | 0.64675500  | 5.67653300  |

|    |             |            |            |
|----|-------------|------------|------------|
| H  | -6.58970600 | 1.87601700 | 6.81990300 |
| H  | -5.60209600 | 0.41039200 | 6.51689600 |
| C  | -5.60162000 | 1.85760300 | 4.96139300 |
| O  | -4.40504500 | 1.65812500 | 4.58161200 |
| O  | -6.11770100 | 2.76585900 | 4.24157700 |
| Na | -4.91275300 | 3.48751400 | 2.39545000 |

### TS1

|    |             |             |             |
|----|-------------|-------------|-------------|
| N  | -2.84354000 | 1.28410300  | 0.15357300  |
| C  | -3.63001900 | 2.01465000  | 0.91255100  |
| H  | -3.95448000 | 1.46682700  | 1.94200800  |
| O  | -4.07103700 | 3.15004100  | 0.72114300  |
| C  | -2.36132900 | 1.78862600  | -1.13771500 |
| H  | -1.26779200 | 1.80793500  | -1.12492000 |
| H  | -2.70376800 | 1.11755500  | -1.93066000 |
| H  | -2.74961900 | 2.79212800  | -1.30638600 |
| C  | -2.40917100 | -0.06050400 | 0.53534900  |
| H  | -2.81255700 | -0.32606800 | 1.51149500  |
| H  | -2.76097900 | -0.77712400 | -0.21228600 |
| H  | -1.31644700 | -0.08477100 | 0.57319200  |
| C  | -5.45933300 | 0.81503700  | 5.17251000  |
| H  | -6.54713500 | 0.68763200  | 5.13783700  |
| H  | -5.21275600 | 1.46779300  | 6.01585400  |
| H  | -4.98374100 | -0.15847600 | 5.30252100  |
| C  | -5.02809100 | 1.50356000  | 3.89706600  |
| O  | -4.29771300 | 0.74212200  | 3.12884300  |
| O  | -5.35849400 | 2.66389400  | 3.63056100  |
| Na | -5.28386600 | 4.32437200  | 2.22288300  |

### AcOHNa

|    |             |            |            |
|----|-------------|------------|------------|
| H  | -3.88498900 | 0.50534600 | 2.69612800 |
| C  | -5.66116900 | 1.15975400 | 5.28400000 |
| H  | -6.54290600 | 0.53062700 | 5.11373000 |
| H  | -5.97985600 | 2.11704300 | 5.70011400 |
| H  | -5.01012000 | 0.63769100 | 5.99044400 |
| C  | -4.96219400 | 1.36588800 | 3.97820100 |
| O  | -4.28570100 | 0.29582500 | 3.56670300 |
| O  | -4.99896100 | 2.39407700 | 3.30480800 |
| Na | -5.91837000 | 4.36579000 | 3.36975400 |

### INT3

|   |             |            |             |
|---|-------------|------------|-------------|
| C | -4.22754300 | 1.30181700 | 0.16757400  |
| H | -4.40651600 | 2.36584200 | 0.33351000  |
| H | -4.90551400 | 0.93743600 | -0.61320900 |

|   |             |             |             |
|---|-------------|-------------|-------------|
| H | -4.43454400 | 0.75193900  | 1.09339000  |
| C | -2.39958600 | -0.26332700 | -0.48880500 |
| H | -3.02142600 | -0.71711500 | -1.26856500 |
| H | -1.35925000 | -0.24753600 | -0.81532000 |
| H | -2.48800200 | -0.86070600 | 0.42593200  |
| N | -2.84155000 | 1.11063600  | -0.23595700 |
| C | -2.01699900 | 2.15005600  | -0.34130400 |
| O | -0.84431900 | 2.20408000  | -0.65041000 |

**TS2**

|   |             |             |             |
|---|-------------|-------------|-------------|
| C | -4.07036600 | 1.20430200  | 0.44528400  |
| H | -4.33480700 | 2.26176600  | 0.54059300  |
| H | -4.97144500 | 0.64919700  | 0.14288000  |
| H | -3.76037500 | 0.81293900  | 1.42598600  |
| C | -2.56226900 | -0.32575200 | -0.65325400 |
| H | -1.67679700 | -0.36383100 | -1.29465700 |
| H | -2.31779600 | -0.75162900 | 0.33120700  |
| H | -3.34368400 | -0.95769100 | -1.10069500 |
| N | -3.06581900 | 1.03237700  | -0.58888200 |
| C | -1.56287100 | 2.19111400  | -0.10602800 |
| O | -1.70896600 | 3.32642300  | -0.27165200 |

**CO**

|   |             |            |             |
|---|-------------|------------|-------------|
| C | -1.88033000 | 2.45307200 | -0.64556100 |
| O | -1.12257400 | 2.48166400 | -1.49368900 |

**INT4**

|   |             |             |             |
|---|-------------|-------------|-------------|
| C | -4.17838600 | 1.28237500  | 0.15083700  |
| H | -4.42739600 | 2.32331600  | 0.38230600  |
| H | -4.84822100 | 0.93403100  | -0.65486700 |
| H | -4.40418200 | 0.65711400  | 1.03179600  |
| C | -2.42519300 | -0.20811400 | -0.46740500 |
| H | -3.07863800 | -0.68963800 | -1.21546000 |
| H | -1.38738200 | -0.27629200 | -0.80996000 |
| H | -2.52953900 | -0.79775500 | 0.46002600  |
| N | -2.79756300 | 1.16714300  | -0.24716500 |

**INT5**

|   |             |             |             |
|---|-------------|-------------|-------------|
| C | 0.22636800  | -2.55277400 | -0.72628600 |
| C | -1.06429300 | -1.91985400 | -0.69826700 |
| C | -1.06842900 | -0.50354200 | -0.28150800 |
| C | 0.13665900  | 0.16850800  | 0.06324400  |
| C | 1.44015600  | -0.52313900 | 0.02067500  |
| C | 1.39687800  | -1.90015900 | -0.39040200 |

|   |             |             |             |
|---|-------------|-------------|-------------|
| H | -3.19248500 | -0.32901800 | -0.49408500 |
| H | 0.24727500  | -3.59754200 | -1.03202200 |
| C | -2.28576100 | 0.20434800  | -0.22467200 |
| C | 0.07779500  | 1.52091700  | 0.45510300  |
| H | 2.34950900  | -2.42589900 | -0.42832800 |
| C | -1.12934700 | 2.19964000  | 0.50635500  |
| C | -2.32341300 | 1.53457900  | 0.16226300  |
| H | 1.01150700  | 2.01110600  | 0.71480900  |
| H | -1.15775500 | 3.24294700  | 0.81128600  |
| H | -3.27109600 | 2.06620700  | 0.20143000  |
| O | 2.51393200  | 0.06856900  | 0.32691900  |
| O | -2.13091100 | -2.52383900 | -1.00573800 |

### TS3

|   |             |            |             |
|---|-------------|------------|-------------|
| C | -1.31825800 | 6.06702300 | -1.94300900 |
| C | -2.62477800 | 5.73996900 | -1.32902300 |
| C | -3.05757300 | 6.71616100 | -0.26430500 |
| C | -2.24974800 | 7.80571300 | 0.11478600  |
| C | -0.92530300 | 8.04443800 | -0.53407400 |
| C | -0.52981800 | 7.10886300 | -1.57995700 |
| H | -4.91893900 | 5.71418300 | 0.02267000  |
| H | -1.00833000 | 5.39591600 | -2.74153300 |
| C | -4.30527600 | 6.54873000 | 0.34745700  |
| C | -2.69728500 | 8.69605300 | 1.10527400  |
| H | 0.43347800  | 7.29033200 | -2.05167000 |
| C | -3.93141000 | 8.51142400 | 1.71553200  |
| C | -4.73957900 | 7.42993500 | 1.33180700  |
| H | -2.05423800 | 9.52756600 | 1.37721200  |
| H | -4.27196100 | 9.20203200 | 2.48249600  |
| H | -5.70861700 | 7.28492800 | 1.80334000  |
| O | -0.20693100 | 8.99714300 | -0.19580600 |
| O | -3.50514600 | 5.13250100 | -2.01041700 |
| C | -1.55475600 | 3.25118000 | -0.91093500 |
| H | -2.31626100 | 3.21306200 | -1.70221600 |
| H | -0.55132200 | 3.22067900 | -1.38668600 |
| H | -1.64410800 | 2.32191700 | -0.31625800 |
| C | -0.67766500 | 4.80277600 | 0.68783800  |
| H | 0.27413400  | 4.92189800 | 0.12687100  |
| H | -0.87242700 | 5.75352000 | 1.20022100  |
| H | -0.47785200 | 4.05384700 | 1.47749700  |
| N | -1.81123400 | 4.41895500 | -0.10816200 |

### INT6

|   |             |            |             |
|---|-------------|------------|-------------|
| C | -1.78871000 | 5.23300400 | -1.57706700 |
|---|-------------|------------|-------------|

|   |             |            |             |
|---|-------------|------------|-------------|
| C | -3.03834200 | 5.27904000 | -0.71824000 |
| C | -3.06270900 | 6.55563900 | 0.14502500  |
| C | -2.11241400 | 7.58430900 | 0.01296500  |
| C | -0.95384200 | 7.44900700 | -0.92166000 |
| C | -0.88549400 | 6.22893500 | -1.71951000 |
| H | -4.86700000 | 5.94915000 | 1.12118600  |
| H | -1.71436000 | 4.34363100 | -2.20030400 |
| C | -4.13507700 | 6.74523700 | 1.02692300  |
| C | -2.24520700 | 8.76977500 | 0.75672700  |
| H | -0.07795000 | 6.18179600 | -2.44858600 |
| C | -3.30926000 | 8.94076000 | 1.63279100  |
| C | -4.26014400 | 7.91725400 | 1.76617300  |
| H | -1.49289000 | 9.54244800 | 0.62997400  |
| H | -3.40667400 | 9.85769900 | 2.20805600  |
| H | -5.09765800 | 8.04196700 | 2.44877000  |
| O | -0.10691300 | 8.34735900 | -1.02633800 |
| O | -4.05723300 | 5.25736200 | -1.57855700 |
| C | -3.35187800 | 2.84688100 | -0.40614400 |
| H | -4.12930400 | 3.04322200 | -1.14820900 |
| H | -2.47886900 | 2.39867600 | -0.92388700 |
| H | -3.71170300 | 2.10384600 | 0.31957000  |
| C | -1.88339300 | 4.00124900 | 1.10467100  |
| H | -1.69038500 | 4.95979600 | 1.59855400  |
| H | -2.04482400 | 3.24853000 | 1.88849200  |
| H | -0.96173600 | 3.71323300 | 0.56097900  |
| N | -3.06089800 | 4.10218000 | 0.26043400  |

#### TS4

|   |             |             |             |
|---|-------------|-------------|-------------|
| C | -2.33409700 | 5.40417900  | -1.29526500 |
| C | -3.63471800 | 5.98597400  | -0.96005800 |
| C | -3.56990100 | 7.23983500  | -0.14634400 |
| C | -2.33548500 | 7.87634500  | 0.09721600  |
| C | -1.04499500 | 7.31261600  | -0.42216900 |
| C | -1.13495600 | 6.05480700  | -1.11400800 |
| H | -5.69029600 | 7.31374700  | 0.11714300  |
| H | -2.37288700 | 4.47600400  | -1.85936800 |
| C | -4.75198800 | 7.81500700  | 0.33435900  |
| C | -2.31382700 | 9.07299400  | 0.82933400  |
| H | -0.20121000 | 5.60137300  | -1.43782600 |
| C | -3.49094400 | 9.62783900  | 1.31966900  |
| C | -4.71722600 | 8.99444100  | 1.07158900  |
| H | -1.35324400 | 9.54883100  | 1.00028700  |
| H | -3.46184100 | 10.55223400 | 1.89073400  |
| H | -5.63898100 | 9.42643700  | 1.45288400  |

|   |             |            |             |
|---|-------------|------------|-------------|
| O | 0.02688100  | 7.92391600 | -0.23550800 |
| O | -4.70235600 | 5.61295500 | -1.48418000 |
| C | -3.64963400 | 3.26797500 | 0.18549100  |
| H | -4.39616200 | 3.42209800 | -0.60689600 |
| H | -2.83171500 | 2.63634000 | -0.22248100 |
| H | -4.14027200 | 2.66398300 | 0.97561200  |
| C | -2.01247000 | 4.50328300 | 1.42780600  |
| H | -1.21051200 | 3.88054100 | 0.97688300  |
| H | -1.60452900 | 5.51620800 | 1.55371600  |
| H | -2.18003200 | 4.10704300 | 2.44897300  |
| N | -3.23371100 | 4.54832000 | 0.68324000  |

### INT7

|   |             |             |             |
|---|-------------|-------------|-------------|
| C | -2.33491400 | 4.32089400  | -0.04902200 |
| C | -3.57967300 | 5.02235000  | 0.48114600  |
| C | -3.54983900 | 6.50909700  | 0.40697700  |
| C | -2.30236100 | 7.16094200  | 0.46333800  |
| C | -1.01258200 | 6.38055400  | 0.65047600  |
| C | -1.11486200 | 5.00141300  | 0.49682200  |
| H | -5.68503000 | 6.71314100  | 0.31800100  |
| H | -2.38098500 | 3.27028200  | 0.29334200  |
| C | -4.73721500 | 7.24368000  | 0.33733200  |
| C | -2.27675600 | 8.55690800  | 0.43758700  |
| H | -0.21634200 | 4.40178800  | 0.63277600  |
| C | -3.45993000 | 9.29199300  | 0.33024200  |
| C | -4.69503900 | 8.63778500  | 0.27964200  |
| H | -1.31030000 | 9.04426800  | 0.52031300  |
| H | -3.42231400 | 10.37837800 | 0.29727300  |
| H | -5.61583400 | 9.20964800  | 0.20231700  |
| O | 0.02154100  | 7.04441400  | 0.97157600  |
| O | -4.55159800 | 4.41727900  | 0.92283300  |
| C | -1.20087800 | 3.95988600  | -2.19886100 |
| H | -0.40111700 | 4.63440100  | -1.88551600 |
| H | -0.88488200 | 2.92259500  | -1.96696700 |
| H | -1.32000100 | 4.03690300  | -3.28593600 |
| C | -3.52806700 | 3.46946500  | -2.00998800 |
| H | -4.48314600 | 3.77792200  | -1.57597000 |
| H | -3.61442900 | 3.53314800  | -3.10080800 |
| H | -3.36632700 | 2.40533700  | -1.74441800 |
| N | -2.44918400 | 4.33609100  | -1.55094200 |

### AcOH

|   |             |             |            |
|---|-------------|-------------|------------|
| C | -3.46812700 | 0.41974300  | 0.03338500 |
| H | -3.07329400 | -0.47558900 | 0.52503800 |

|   |             |             |             |
|---|-------------|-------------|-------------|
| H | -3.17252100 | 1.30953000  | 0.59053100  |
| H | -3.04007200 | 0.45787400  | -0.97442300 |
| C | -4.96722500 | 0.34558000  | -0.05191800 |
| O | -5.74966400 | 1.16539000  | 0.38413400  |
| O | -5.37664200 | -0.77204800 | -0.69645300 |
| H | -6.35463500 | -0.74262000 | -0.71500900 |

**AcO<sup>-</sup>**

|   |             |             |             |
|---|-------------|-------------|-------------|
| C | -3.47176400 | 0.41045300  | 0.04112900  |
| H | -3.00929300 | -0.52084600 | 0.39187600  |
| H | -3.18918300 | 1.23062600  | 0.71205900  |
| H | -3.04082000 | 0.62635000  | -0.94786900 |
| C | -5.01799800 | 0.26405000  | -0.08465600 |
| O | -5.69766200 | 1.28318900  | 0.20619400  |
| O | -5.42432000 | -0.85230300 | -0.50317600 |

**INT8**

|   |             |             |             |
|---|-------------|-------------|-------------|
| C | 1.37337000  | -0.82209500 | -0.52890300 |
| C | 0.12609200  | -1.65559000 | -0.20190700 |
| C | -1.14912100 | -0.94616000 | 0.06480800  |
| C | -1.28055800 | 0.42580000  | -0.24619800 |
| C | -0.13166600 | 1.15330500  | -0.80478000 |
| C | 1.08065900  | 0.59024200  | -0.93985800 |
| H | -2.10233800 | -2.70235400 | 0.82968100  |
| H | 1.87732000  | -1.34121800 | -1.35346800 |
| C | -2.23177300 | -1.64885200 | 0.60401300  |
| C | -2.50562200 | 1.06237500  | -0.01165000 |
| H | 1.91773800  | 1.17025600  | -1.32287000 |
| C | -3.57572400 | 0.35078700  | 0.53060700  |
| C | -3.44312400 | -1.00580400 | 0.84234000  |
| H | -2.61718800 | 2.11318900  | -0.25206500 |
| H | -4.51898200 | 0.85893200  | 0.70992100  |
| H | -4.27960100 | -1.55449300 | 1.26472000  |
| O | -0.42143000 | 2.44163400  | -1.15461200 |
| O | 0.21371600  | -2.87663900 | -0.10995100 |
| N | 2.33760200  | -0.83268300 | 0.59809800  |
| H | 0.39236300  | 2.86198700  | -1.48598000 |
| C | 1.79051700  | -0.33411800 | 1.85618600  |
| H | 1.08702200  | -1.03535500 | 2.34012700  |
| H | 2.61443500  | -0.15446400 | 2.55595100  |
| H | 1.27198600  | 0.61373300  | 1.68721300  |
| C | 3.02202900  | -2.10578500 | 0.78512700  |
| H | 2.37380200  | -2.90462800 | 1.18067500  |
| H | 3.43660800  | -2.44588700 | -0.16974800 |



H 3.84922200 -1.95813300 1.48991100

**INT9**

C -1.86886600 4.67972700 -1.07836400  
C -3.16091900 5.49789100 -1.15514500  
C -3.23612300 6.65829500 -0.22318500  
C -2.06280500 7.18156000 0.36008400  
C -0.72342900 6.63555900 -0.01226300  
C -0.70486500 5.67767200 -1.18659200  
H -5.37131200 6.80727900 -0.36738300  
H -1.85993500 3.98588400 -1.93543300  
C -4.47745300 7.22076700 0.08801300  
C -2.15349800 8.24782200 1.25859500  
H -0.83117400 6.26399900 -2.10727900  
C -3.39594600 8.79470200 1.57372400  
C -4.55808200 8.28282500 0.98660200  
H -1.24211300 8.64392700 1.69415300  
H -3.46109900 9.62301600 2.27309200  
H -5.52494000 8.71132100 1.23335300  
O 0.29608400 6.97377900 0.57232300  
O -4.06694600 5.21771700 -1.92511600  
C -2.97656200 3.07245600 0.35692900  
H -3.91185800 3.63930500 0.33896100  
H -3.02510500 2.30400500 -0.43614000  
H -2.91156600 2.56376100 1.32331400  
C -0.58356100 3.22141700 0.39384000  
H -0.39341600 2.49390000 -0.41627600  
H 0.27192700 3.89737400 0.45967400  
H -0.64248400 2.67184300 1.33811700  
N -1.82869800 3.96638500 0.20884600  
H 0.26670900 5.18532700 -1.24707300

**TS5**

C 0.25022500 -0.78528300 -0.37606000  
C -1.20267300 -0.97453800 -0.12199500  
C -1.77807000 0.06008000 0.81605300  
C -1.01248500 1.14102100 1.30518200  
C 0.43237300 1.27092900 0.96759400  
C 1.00052700 0.23179000 0.11610900  
H -3.72454700 -0.81245200 0.71150400  
H 0.68599600 -1.51270700 -1.05975700  
C -3.14279400 -0.00063100 1.13788600  
C -1.61181900 2.10522800 2.13643700  
H 2.05927000 0.32799800 -0.11668300

|   |             |             |             |
|---|-------------|-------------|-------------|
| C | -2.95483700 | 2.01308500  | 2.47203600  |
| C | -3.72445500 | 0.95110100  | 1.96488300  |
| H | -0.99425900 | 2.91881700  | 2.50514300  |
| H | -3.41224200 | 2.75901800  | 3.11667400  |
| H | -4.78020000 | 0.88120000  | 2.21627700  |
| O | 1.11526100  | 2.21495800  | 1.39756000  |
| O | -1.94370200 | -1.37858100 | -1.08390200 |
| C | 0.33797900  | -1.54918700 | 2.93022700  |
| H | -0.14421000 | -0.61350400 | 2.66769200  |
| H | 0.20784400  | -1.70331600 | 4.00836800  |
| H | 1.41570900  | -1.46976400 | 2.72780700  |
| C | -0.06266500 | -3.96803800 | 2.81911400  |
| H | -0.58907000 | -4.04897800 | 3.78015200  |
| H | -0.44005100 | -4.72978200 | 2.13756400  |
| H | 1.00705800  | -4.13592500 | 3.00182500  |
| N | -0.27228100 | -2.65411200 | 2.21710300  |
| C | -0.95547100 | -2.53800700 | 1.03648300  |
| O | -1.48004500 | -3.50683200 | 0.50437500  |

#### INT10

|   |             |             |             |
|---|-------------|-------------|-------------|
| C | 0.53091000  | -0.72093800 | -0.08797600 |
| C | -0.89684500 | -1.08638100 | 0.19519500  |
| C | -1.60873600 | -0.01056600 | 1.02957400  |
| C | -1.03390200 | 1.25690800  | 1.24548300  |
| C | 0.35407600  | 1.57404500  | 0.77143200  |
| C | 1.06870600  | 0.51865100  | 0.08366700  |
| H | -3.35635400 | -1.22349400 | 1.32176500  |
| H | 1.09022800  | -1.49431600 | -0.60935800 |
| C | -2.90790600 | -0.24859700 | 1.49530000  |
| C | -1.75919700 | 2.24880100  | 1.92194400  |
| H | 2.04619100  | 0.77783200  | -0.31819900 |
| C | -3.04798000 | 1.99954500  | 2.38289100  |
| C | -3.62356800 | 0.74116000  | 2.16627800  |
| H | -1.28440200 | 3.21282000  | 2.07705200  |
| H | -3.60287000 | 2.77312200  | 2.90704300  |
| H | -4.63046700 | 0.53505300  | 2.52123100  |
| O | 0.84008400  | 2.70249600  | 0.95640800  |
| O | -1.34999900 | -1.12195500 | -1.07921600 |
| C | 0.47879900  | -1.75119200 | 2.79971900  |
| H | 0.30475900  | -0.73366500 | 2.46415700  |
| H | 0.27595400  | -1.79094800 | 3.87713700  |
| H | 1.53933400  | -1.99543600 | 2.64529600  |
| C | -0.47433600 | -4.00151500 | 2.75355400  |
| H | -0.89790300 | -3.91490100 | 3.76315000  |

|   |             |             |            |
|---|-------------|-------------|------------|
| H | -1.11039400 | -4.64469900 | 2.14704900 |
| H | 0.52432600  | -4.45114000 | 2.84217600 |
| N | -0.39165500 | -2.69520400 | 2.12011600 |
| C | -1.05065500 | -2.47358800 | 0.93403900 |
| O | -1.77553000 | -3.33920900 | 0.44074500 |

**TS6**

|   |             |             |             |
|---|-------------|-------------|-------------|
| C | 0.47443000  | -1.11790300 | 0.93649800  |
| C | -1.01726900 | -1.01460600 | 0.44437300  |
| C | -1.85939600 | -0.09236600 | 1.30694700  |
| C | -1.25006400 | 0.90988000  | 2.08344900  |
| C | 0.25515900  | 1.09664800  | 2.13790400  |
| C | 1.02842200  | 0.11485500  | 1.51266700  |
| H | -3.70322900 | -0.94698100 | 0.62305300  |
| H | 1.05138900  | -1.49779800 | 0.08916900  |
| C | -3.25377400 | -0.18064500 | 1.25028800  |
| C | -2.06543300 | 1.79433500  | 2.80533400  |
| H | 2.11079600  | 0.24152100  | 1.51738500  |
| C | -3.45377100 | 1.68569600  | 2.76976800  |
| C | -4.05436000 | 0.69125900  | 1.98734900  |
| H | -1.56938000 | 2.56826000  | 3.38328100  |
| H | -4.07108100 | 2.37337100  | 3.34347800  |
| H | -5.13744300 | 0.60154000  | 1.95193100  |
| O | 0.69602500  | 2.13563100  | 2.71527900  |
| O | -1.26714900 | -1.04910800 | -0.79432900 |
| C | 1.40763400  | -3.39608600 | 1.64140100  |
| H | 1.43946800  | -3.64112400 | 0.57799200  |
| H | 2.38602500  | -3.01948000 | 1.95858200  |
| H | 1.16508700  | -4.29745100 | 2.21014400  |
| C | 0.21592900  | -2.07425600 | 3.30630000  |
| H | 1.11526900  | -1.58938500 | 3.69337500  |
| H | -0.63640600 | -1.40878500 | 3.44439300  |
| H | 0.03621700  | -3.01086700 | 3.84055600  |
| N | 0.37661300  | -2.37649400 | 1.87429500  |
| C | -1.14924400 | -2.71854200 | 1.21088800  |
| O | -1.39820800 | -3.84564600 | 0.93899400  |

## 8. References

- [1] S. H. Cho, J. Y. Kim, S. Y. Lee, S. Chang, *Angew. Chem., Int. Ed.* **2009**, *48*, 9127.
- [2] G. Li, H. Li, Z. Lu, B. Yu, *Org. Biomol. Chem.*, **2022**, *20*, 5125.
- [3] G. Lahm, T. Opatz, *Org. Lett.* **2014**, *16*, 4201.
- [4] L. P. Long, X. Li, Y. Wang, X. Su, L. Qiao, W. J. Luo, Z. Chen, *J. Org. Chem.*, **2023**, *88*, 7571.
- [5] J. Wang, J. T. Hou, J. Wen, J. Zhang, X. Q. Yu, *Chem. Commun.*, **2011**, *47*, 3652.
- [6] Jha, R. K.; Batabyal, M.; Kumar S. Blue Light Irradiated Metal-, Oxidant-, and Base-Free Cross-Dehydrogenative Coupling of C(sp<sup>2</sup>)-H and N-H Bonds: Amination of Naphthoquinones with Amines. *J. Org. Chem.* **2023**, *88*, 7401-7424.
- [7] Varricchio, C.; Pascale Aeschlimann, K. B.; Heard, C.; Rozanowska, M.; Votruba, M.; Brancale, A. Discovery of Novel 2-Aniline-1,4-naphthoquinones as Potential New Drug Treatment for Leber's Hereditary Optic Neuropathy (LHON). *J. Med. Chem.* **2020**, *63*, 13638-13655.
- [8] Ueda, K.; Yamashita, M.; Sakaguchi, K.; Tokuda, H.; Iida, A. Concise Synthesis of Heterocycle-Fused Naphthoquinones by Employing Sonogashira Coupling and Tandem Addition-Elimination/Intramolecular Cyclization. *Chem. Pharm. Bull.* **2013**, *61*, 648-654.
- [9] Dong, Y.; Peng, Z.; Chen, Y.; Lin, Y.; Lan, M.; Wu, C.; Shi, Z.; Deng, G.; He, B. Copper-catalyzed direct oxidative amination of maleimides and quinones with formamides in the presence of an oxidant KIO<sub>3</sub>. *Tetrahedron.* **2024**, *155*, 133916.
- [10] Wunderer, H. Darstellung und Eigenschaften von Jodamino-*p*-benzochinonen. *Chemische Berichte.* **1972**, *105*, 3479-3490.
- [11] Johnson-Ajinwo, O. R.; Imran Ullah, I.; Mbye, H.; Richardson, A.; Horrocks, P.; Li, W. The synthesis and evaluation of thymoquinone analogues as anti-ovarian cancer and antimalarial agents. *Bioorg. Med. Chem. Lett.* **2018**, *28*, 1219-1222.
- [12] Hewgill, F. R.; Mullings, L. R. Nucleophilic substitution of Bromo-*p*-benzoquinones by dimethylamine. *Aust. J. Chem.* **1975**, *28*, 2561-2566.
- [13] Koharazawa, R.; Hayakawa, M.; Takeda, K.; Miyazaki, K.; Tode, C.; Hirota, Y.; Suhara, Y. Exploring 2-methyl-substituted vitamin K<sub>3</sub> derivatives with potent inhibitory activity against the 3CL protease of SARS-CoV-2. *Bioorg. Med. Chem. Lett.* **2024**, *100*, 129642.
- [14] Gaussian 09, Revision A.02, M. J. Frisch, G. W. Trucks, H. B. Schlegel, G. E. Scuseria, M. A. Robb, J. R. Cheeseman, G. Scalmani, V. Barone, B. Mennucci, G. A. Petersson, H. Nakatsuji, M. Caricato, X. Li, H. P. Hratchian, A. F. Izmaylov, J. Bloino, G. Zheng, J. L. Sonnenberg, M. Hada, M. Ehara, K. Toyota, R. Fukuda, J. Hasegawa, M. Ishida, T. Nakajima, Y. Honda, O. Kitao, H. Nakai, T. Vreven, J. A. Montgomery, Jr., J. E. Peralta, F. Ogliaro, M. Bearpark, J. J. Heyd, E. Brothers, K. N. Kudin, V. N. Staroverov, R. Kobayashi, J. Normand, K. Raghavachari, A. Rendell, J. C. Burant, S. S. Iyengar, J. Tomasi, M. Cossi, N. Rega, J. M. Millam, M. Klene, J. E. Knox, J. B. Cross, V. Bakken, C. Adamo, J. Jaramillo, R. Gomperts, R. E. Stratmann, O. Yazyev, A. J. Austin, R. Cammi, C. Pomelli, J. W. Ochterski, R. L. Martin, K. Morokuma, V. G. Zakrzewski, G. A. Voth, P. Salvador, J. J. Dannenberg, S. Dapprich, A. D. Daniels, Ö. Farkas, J. B. Foresman, J. V. Ortiz, J. Cioslowski, D. J. Fox, Gaussian, Inc., Wallingford CT, **2009**.
- [15] (a) Becke, A. D. *J. Chem. Phys.* **1993**, *98*, 5648. (b) Becke, A. D. *J. Chem. Phys.* **1993**, *98*, 1372. (c) Lee, C.; Yang, W.; Parr, R. G. *Phys. Rev. B* **1988**, *37*, 785. (d) Stephens, P. J.; Devlin, F. J.; Chabalowski, C. F.; Frisch, M. J. *J. Phys. Chem.* **1994**, *98*, 11623.
- [16] S. Grimme, J. Antony, S. Ehrlich, H. Krieg, *J. Chem. Phys.* **2010**, *132*, 154104.
- [17] S. Grimme, S. Ehrlich, L. Goerigk, *J. Comput. Chem.* **2011**, *32*, 1456-1465.

- [18] R. Krishnan, J. S. Binkley, R. Seeger, J. A. Pople, *J. Phys. Chem.* **1980**, *72*, 650-654.
- [19] A. V. Marenich, C. J. Cramer, D. G. Truhlar, *J. Phys. Chem. B* **2009**, *113*, 6378-6396.
- [20] (a) Y. Zhao, D. G. Truhlar, *Theor. Chem. Acc.* **2008**, *120*, 215. (b) Y. Zhao, D. G. Truhlar, *Acc. Chem. Res.* **2008**, *41*, 157.
- [21] (a) L. Szentpály, P. Fuentealba, H. Preuss, H. Stoll, *Chem. Phys. Lett.* **1982**, *93*, 555. (b) M. Dolg, U. Wedig, H. Stoll, H. Preuss, *J. Chem. Phys.* **1987**, *86*, 866. (c) P. Schwerdtfeger, M. Dolg, W. H. E. Schwarz, G. A. Bowmaker, P. D. W. Boyd, *J. Chem. Phys.* **1989**, *91*, 1762.
